# Supplementary material for: An ethnopharmacological survey and comparative analysis of plants from the Sudhnoti District, Azad Jammu and Kashmir, Pakistan
Source: PubMed Central journal article supplement (PMC7980561; doi:10.1186/s13002-021-00435-2), 2021-03-20
Supplement: 13002_2021_435_MOESM1_ESM.pdf [file 13002_2021_435_MOESM1_ESM.pdf]

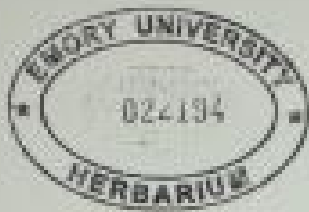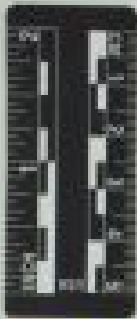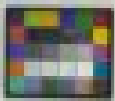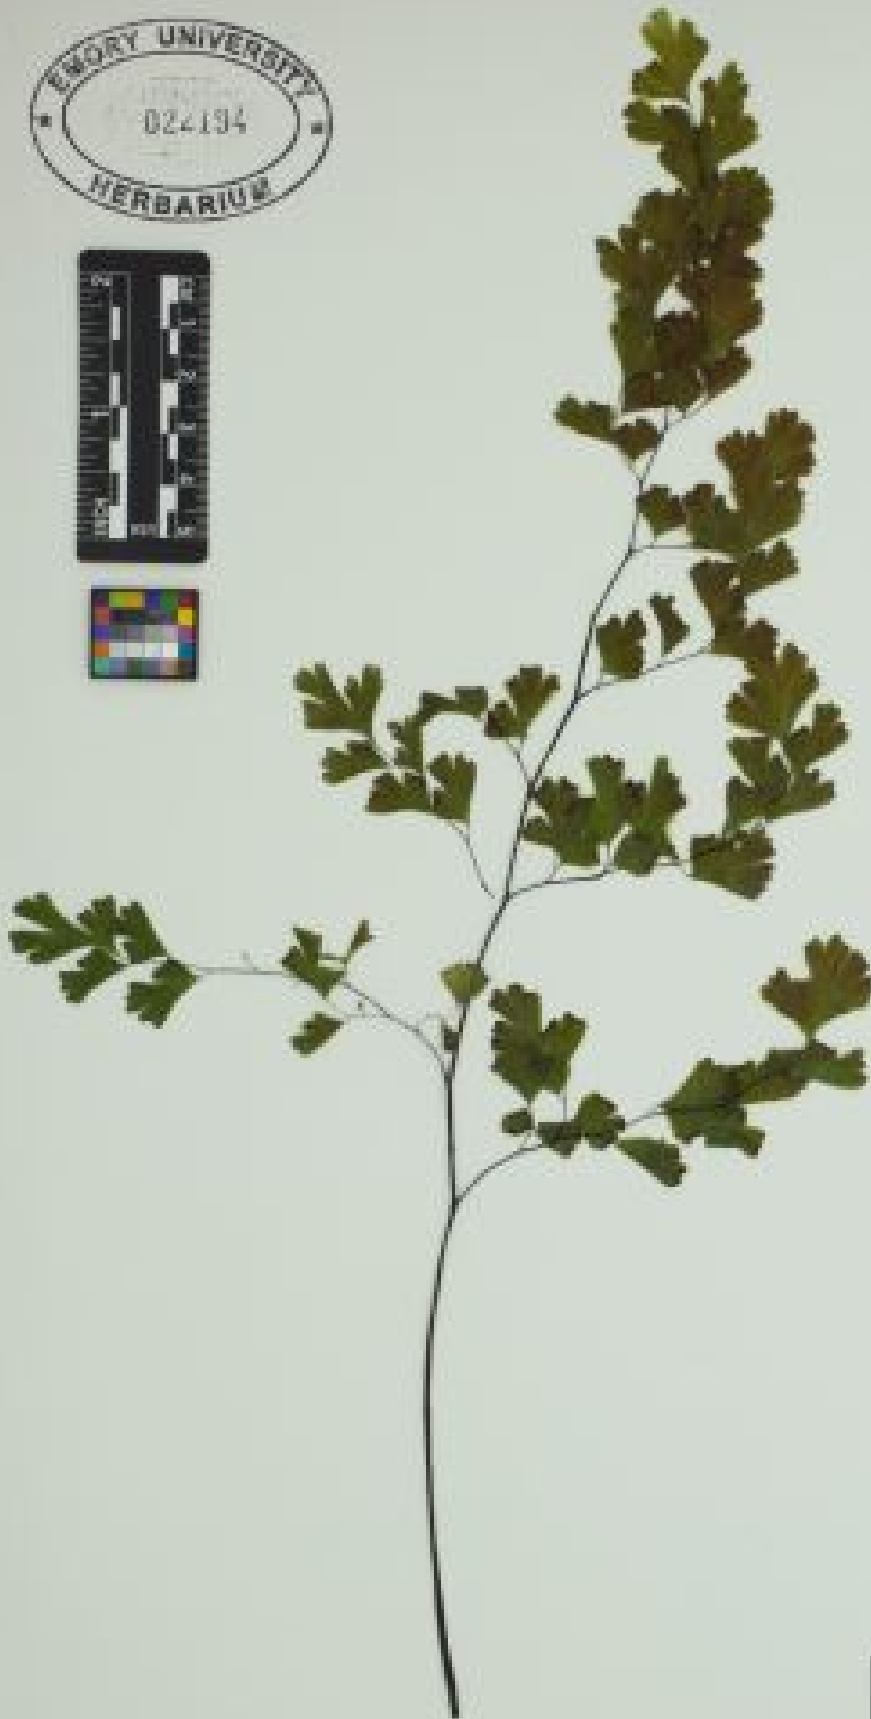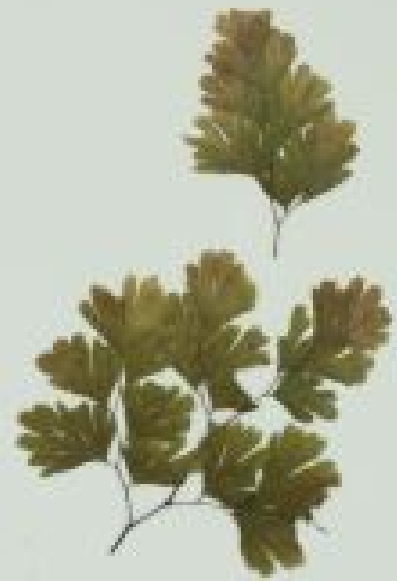

INCORPORATED INTO THE  
MEDICAL BOTANY SPECIAL COLLECTION

**EMORY UNIVERSITY HERBARIUM**  
FLORA OF ISLAMIC REPUBLIC OF PAKISTAN

*Jalsowia capitata* (Desf.) L. PTERIDIACEAE  
"Common maidenhair"

Gandhi, Sialkot, Azad Kashmir, Islamic Republic of Pakistan.

study

shiny, glabrous

Roots are ground and used to treat urinary tract infection common name: Kakra

Muhammad Faraz Khan PK-108 6 June 2017

TP-10

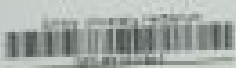

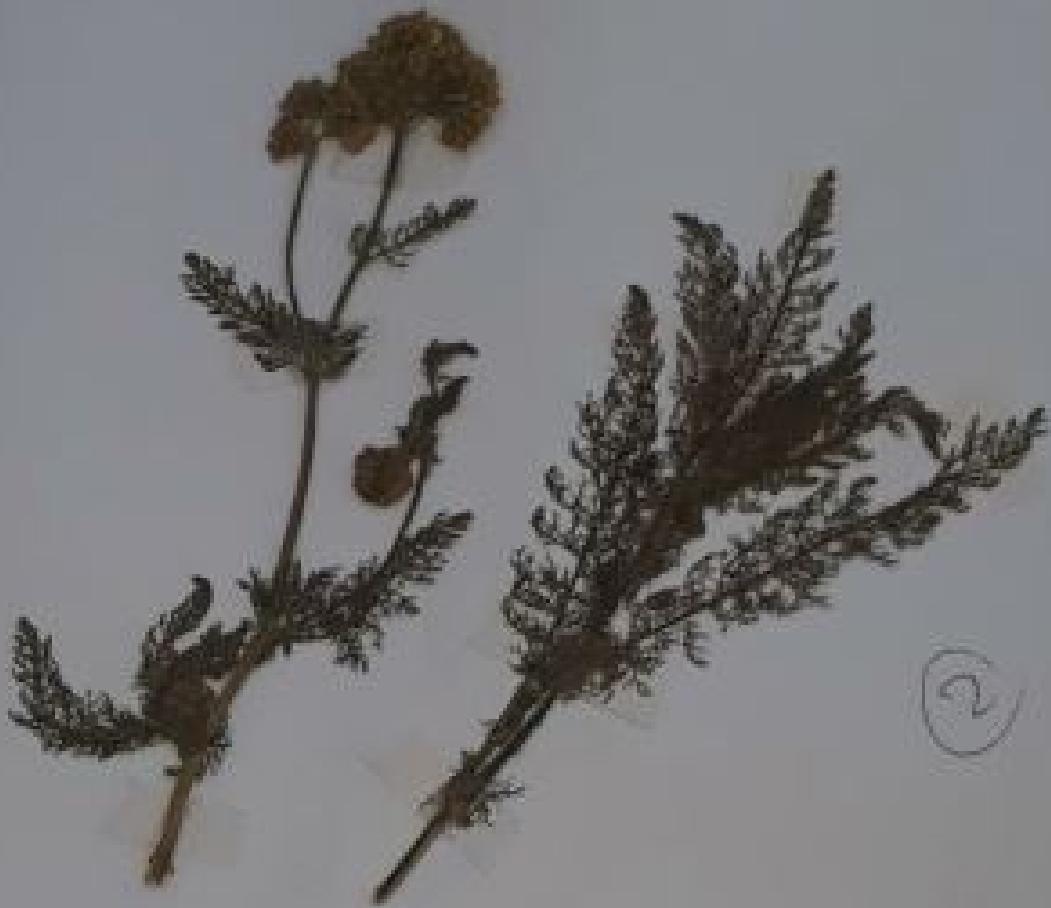

HERBARIUM  
DEPARTMENT OF BOTANY  
PMAS - ARD AGRICULTURE UNIVERSITY RAWALPINDI

Date \_\_\_\_\_  
Accession No. PK-1110 / Specimen No. 2  
Type: Herb  
Botanical Name: Achillea millefolium Linn.  
Local Name: Karagi  
Family: Asteraceae  
Locality: Kot Kotli Chulha  
Date of Collection: \_\_\_\_\_  
Collected By: Fazal  
Identified By: Dr. Rana

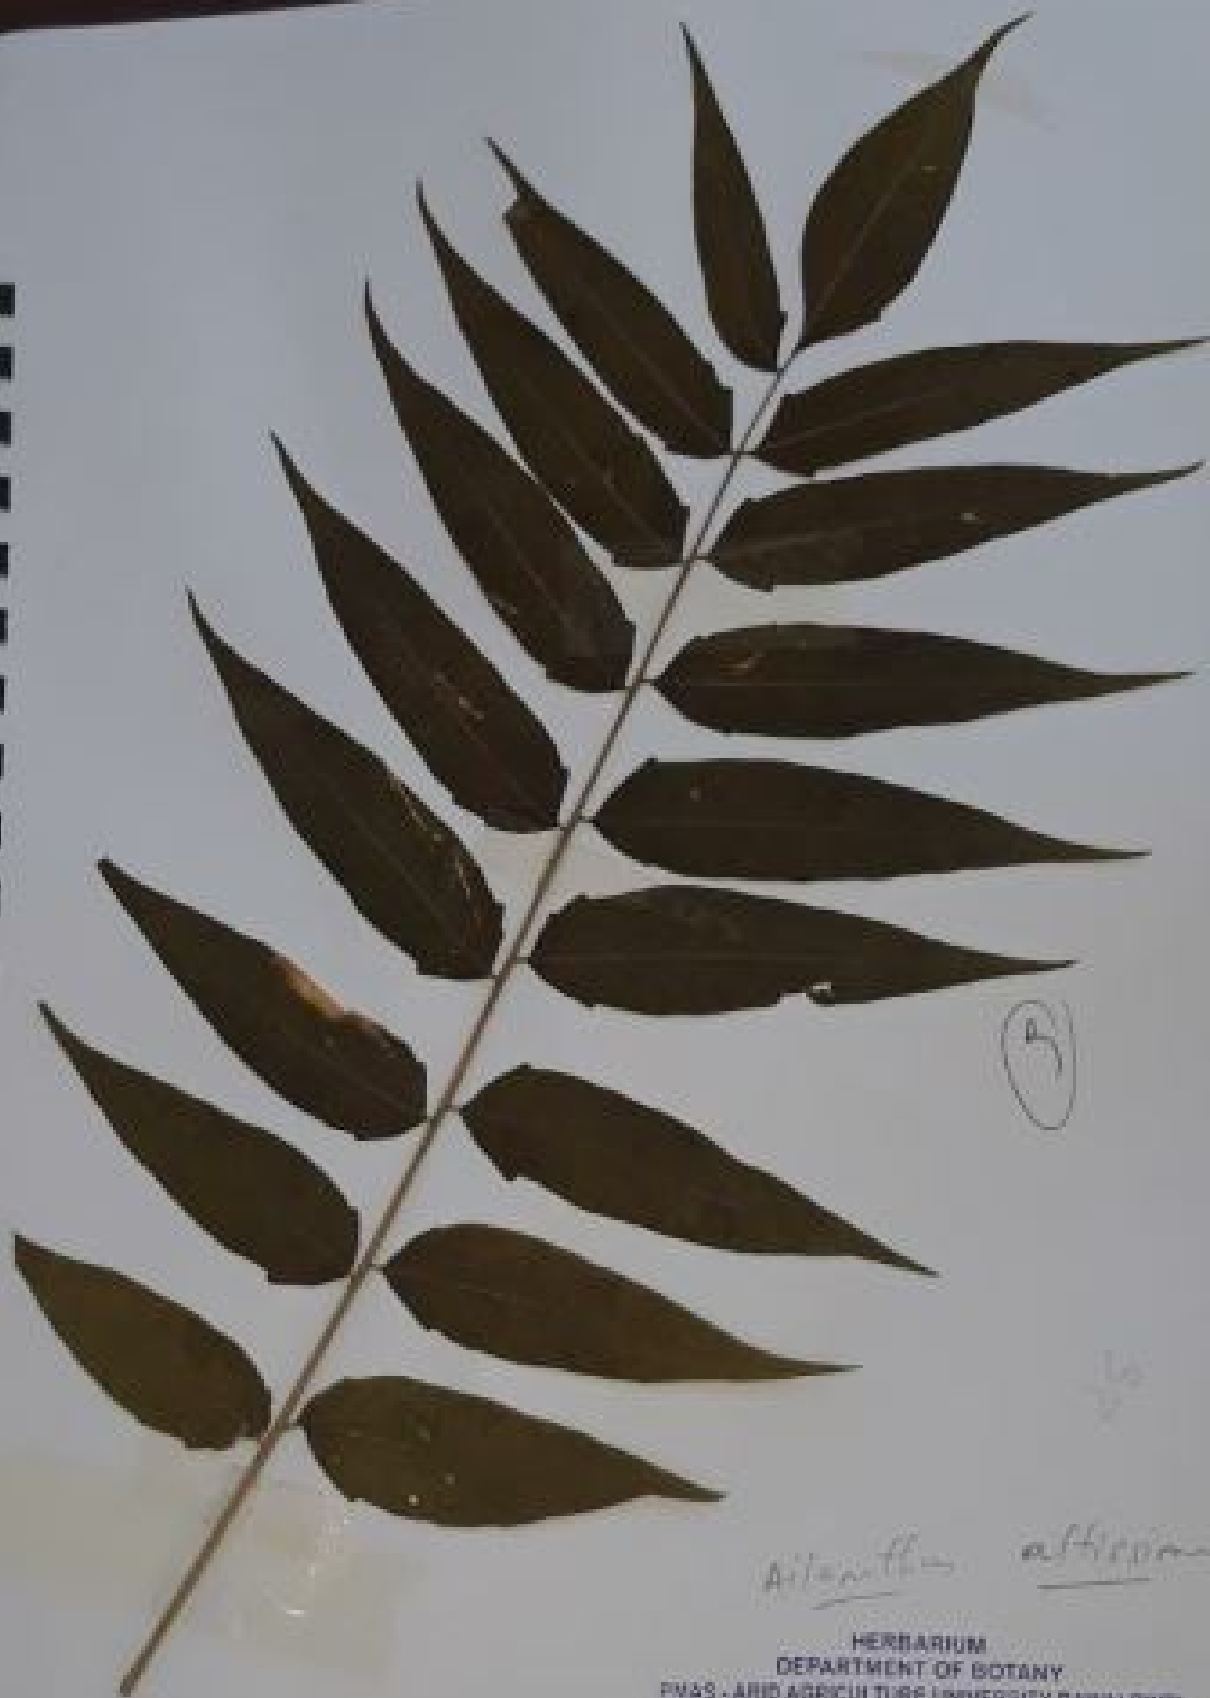

(A)

26

*Ailanthus altissima*

HERBARIUM  
DEPARTMENT OF BOTANY  
FVAS - ARID AGRICULTURE UNIVERSITY RAWALPINDI

Date \_\_\_\_\_

Accession No. ~~112~~ 112 Collector Specimen No. 2

Height \_\_\_\_\_

Botanical Name *Ailanthus altissima*

Local Name DYON

Family \_\_\_\_\_

Locality Baloch (Suth)

Date of Collection \_\_\_\_\_

Collected By Farooq

Identified By Dr. Rahmat

DYON

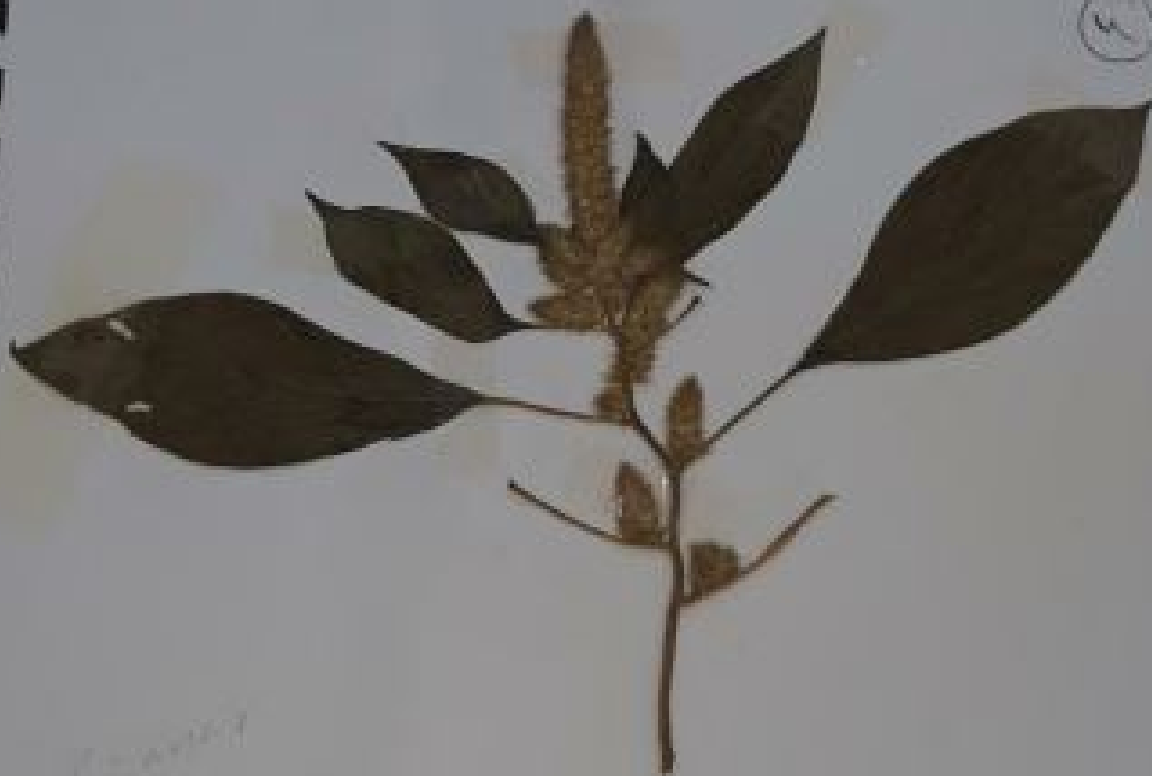

2-11-1977

*Spiridula*

HERBARIUM  
DEPARTMENT OF BOTANY  
PMAS - ARID AGRICULTURE UNIVERSITY RAWALPINDI

Date \_\_\_\_\_

Accession No. EW 1136 Voucher Specimen No. 4

Name Herb

Botanical Name *Amoranthus spinosus*

Local Name Cheera

Family Amaranthaceae

Locality Baloch (Gudh)

Date of Collection \_\_\_\_\_

Collected By Fazal

Handled By Dr. Rehmat

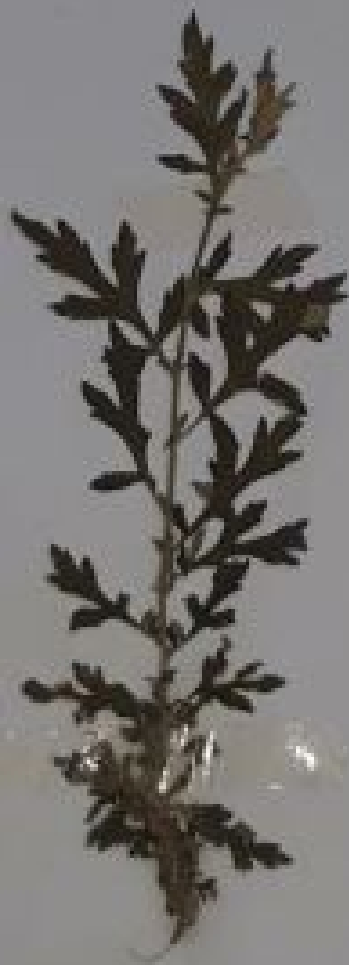

70

Asplenium

HERBARIUM  
DEPARTMENT OF BOTANY  
PMAS - ARID AGRICULTURE UNIVERSITY RAIPUR

Date \_\_\_\_\_  
Accession No. PA 2022 Voucher Specimen No. 6  
Habit Herb  
Botanical Name Asplenium vulgare L.  
Local Name Asplenium  
Family Polypodiaceae  
Locality Basal (Sudh)  
Date of Collection \_\_\_\_\_  
Collected By Farooq  
Identified By Dr. Rehmat

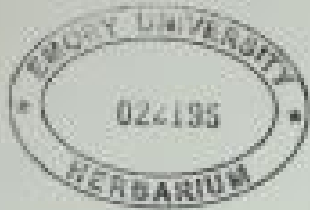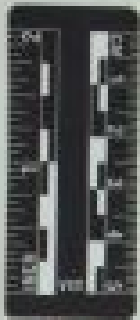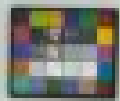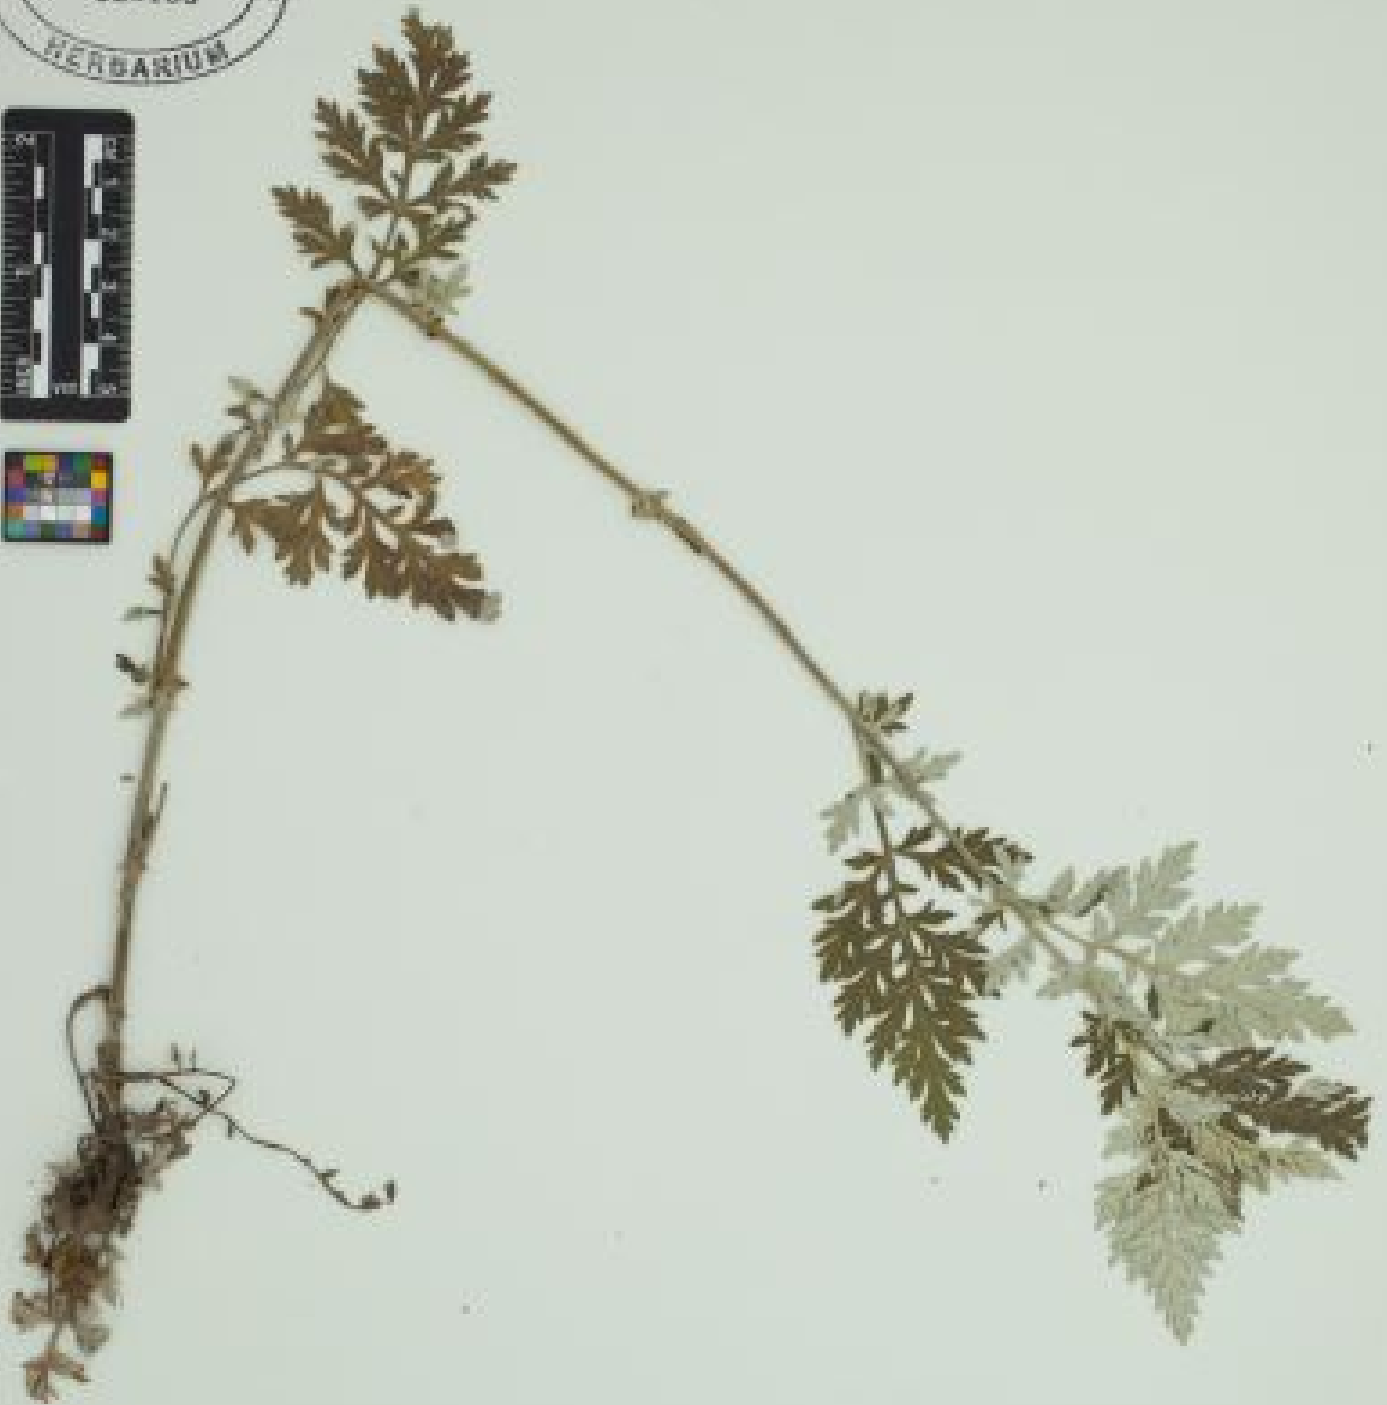

INCORPORATED INTO THE  
MEDICAL BOTANY SPECIAL COLLECTION

FK-106

EMORY UNIVERSITY HERBARIUM  
FLORA OF ISLAMIC REPUBLIC OF PAKISTAN

*Asarum adustum* L. ANTERACEAE  
"aksharban"

Daska, Peshawar, Azad Kashmir, Islamic Republic of Pakistan

wild herb in rural habitat

herb, flowers whitish yellow, stem hollow

Whole plant used for digestive disorders and to treat hypertension  
Local name: Isatana

Muhammad Faraz Khan FK-106

9 June 2017

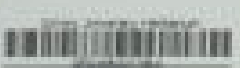

PK0004\_0005

25-September-2017

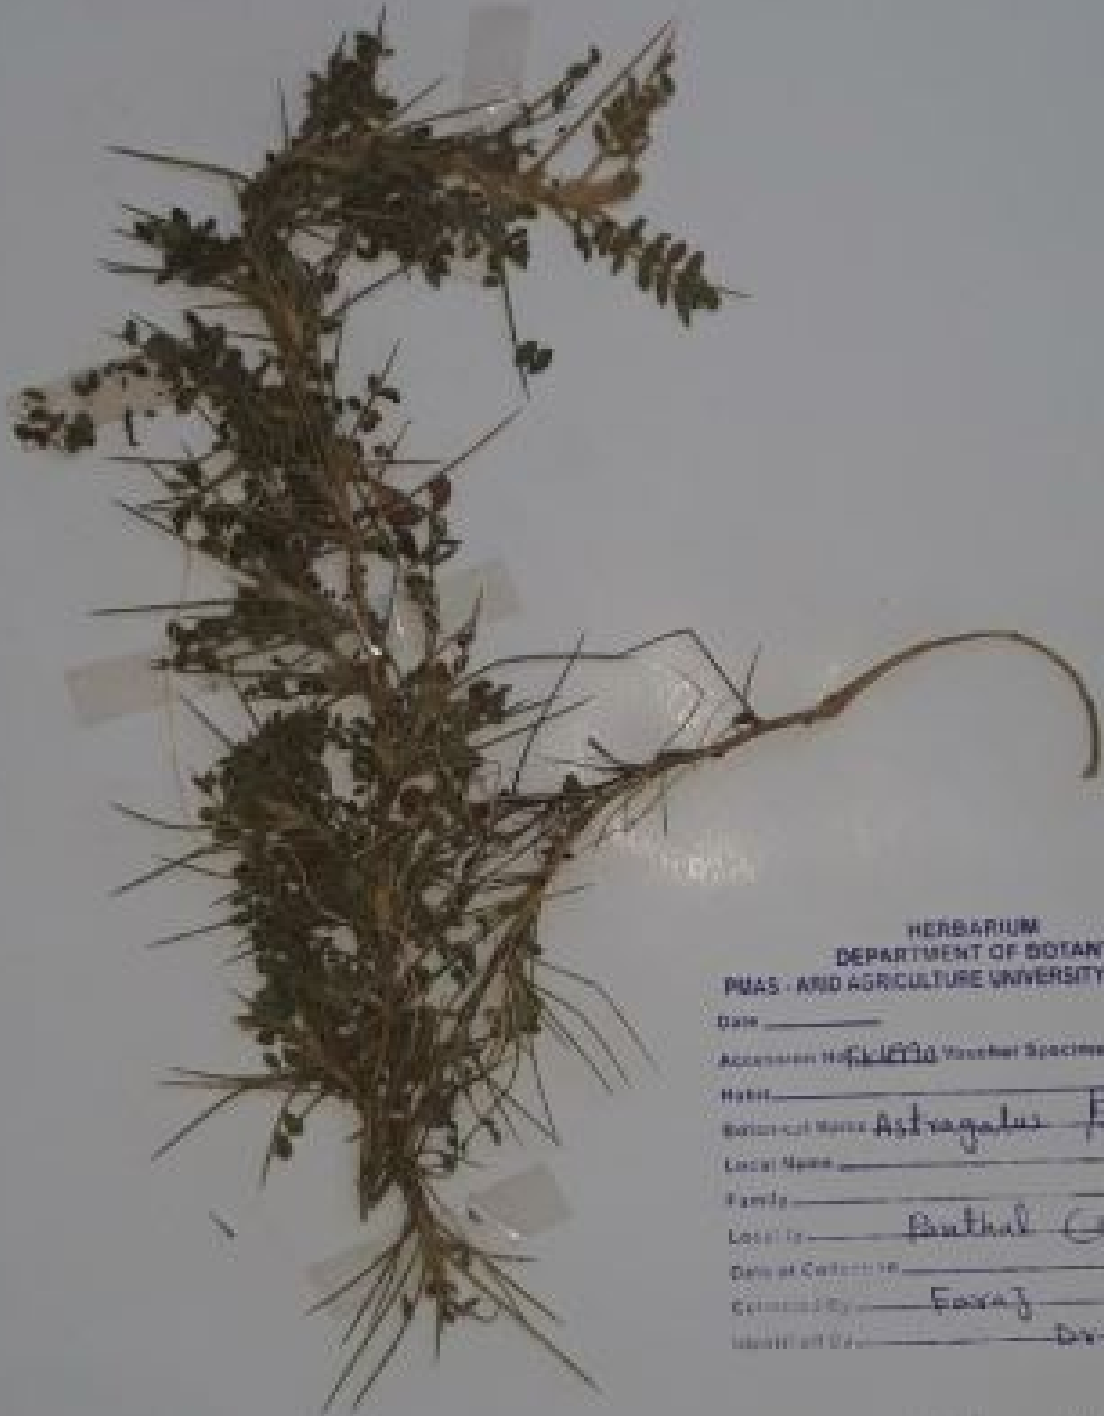

HERBARIUM  
DEPARTMENT OF BOTANY  
PMAAS - AND AGRICULTURE UNIVERSITY RAIPUR

Date \_\_\_\_\_  
Accession No. 11111 Voucher Specimen No. 3  
Host \_\_\_\_\_  
Botanical Name Astragalus filicentus  
Local Name \_\_\_\_\_  
Family \_\_\_\_\_  
Local Use Banthal (cudh)  
Date of Collection \_\_\_\_\_  
Collected by Fozarj  
Number of Sheets one sheet

*Astragalus*  
*filicentus*  
*Psilocentrus*

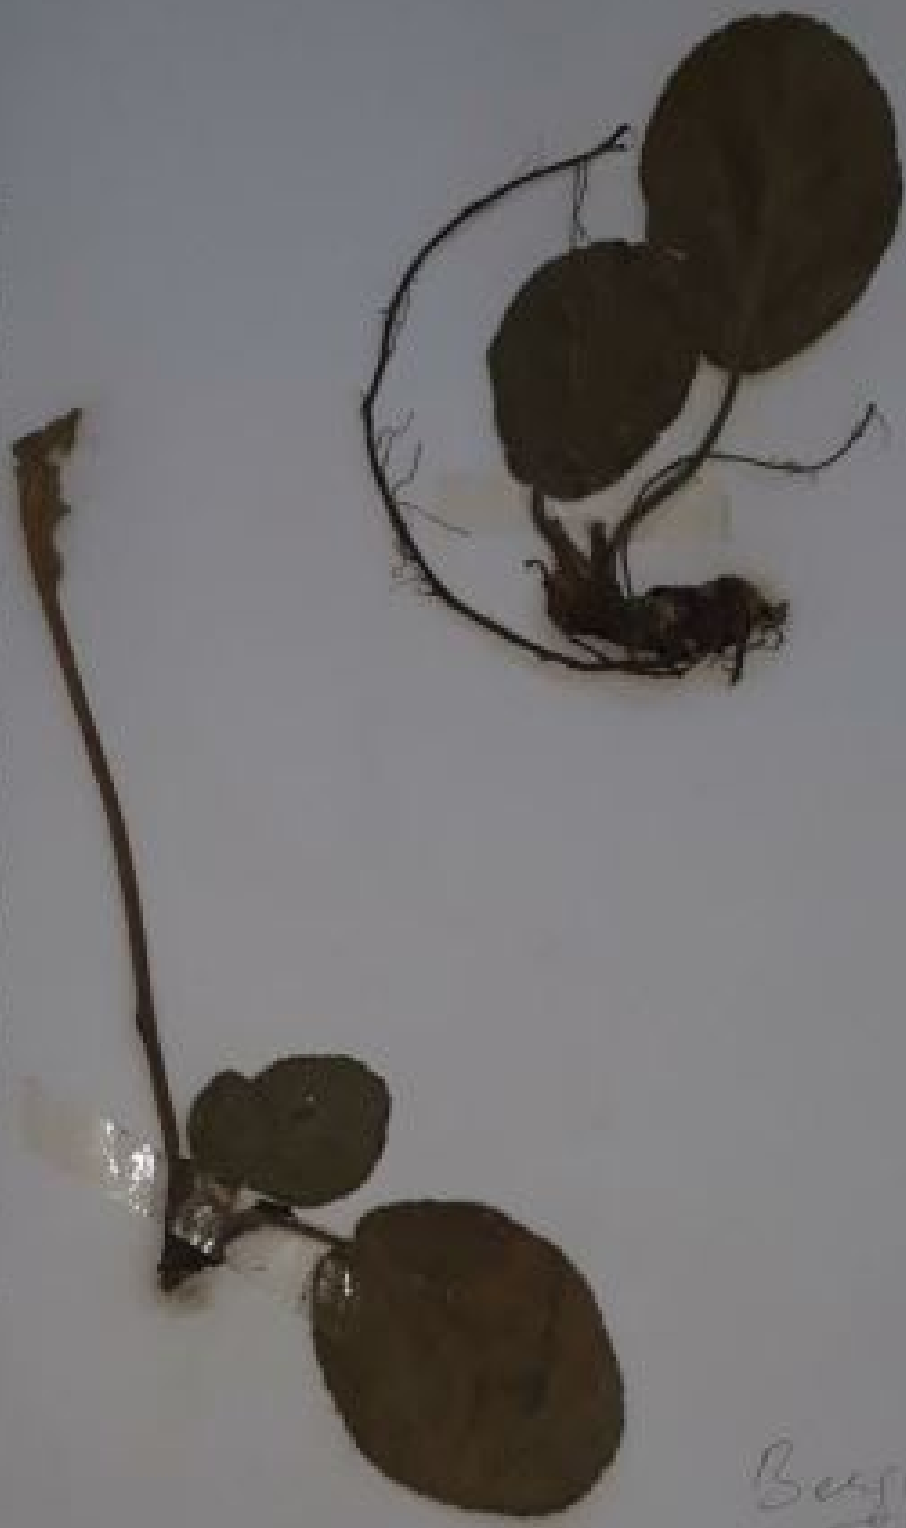

9

*Bergenia ciliata*

HERBARIUM  
 DEPARTMENT OF BOTANY  
 PNAS - ARII AGRICULTURE UNIVERSITY RAWALPINDI

Date \_\_\_\_\_

Accession No. 14111 Voucher Specimen No. 9

Habit Herb

Botanical Name Bergenia ciliata (Horn)

Local Name Chitab

Family Cruciferae

Locality Pothohar (Sudh)

Date of Collection \_\_\_\_\_

Collected by Fazal

Identified by Dr. Rehman



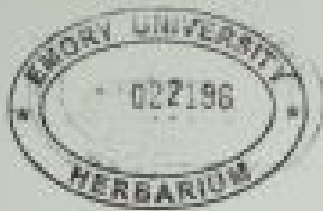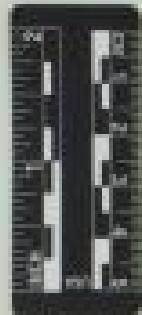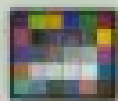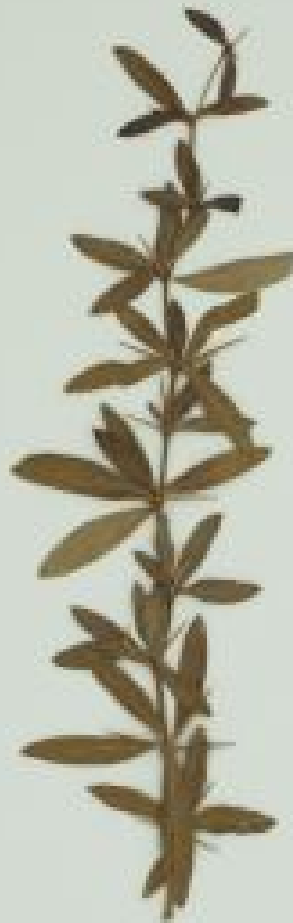

INCORPORATED INTO THE  
MEDICAL BOTANY SPECIAL COLLECTION

FK-MS

EMORY UNIVERSITY HERBARIUM  
FLORA OF ISLAMIC REPUBLIC OF PAKISTAN

*Berberis julina* Royle BERBERIDACEAE  
Goral, Sindhwa, Asal Karim, Islamic Republic of Pakistan  
common in dry habitat  
flowers yellow in color very prickly  
root decoction is used to treat diabetes, piles and jaundice, enteric  
infections local name: Sumbal  
Muhammad Faiz Khan FK-105 5 June 2007

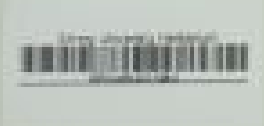

(10)

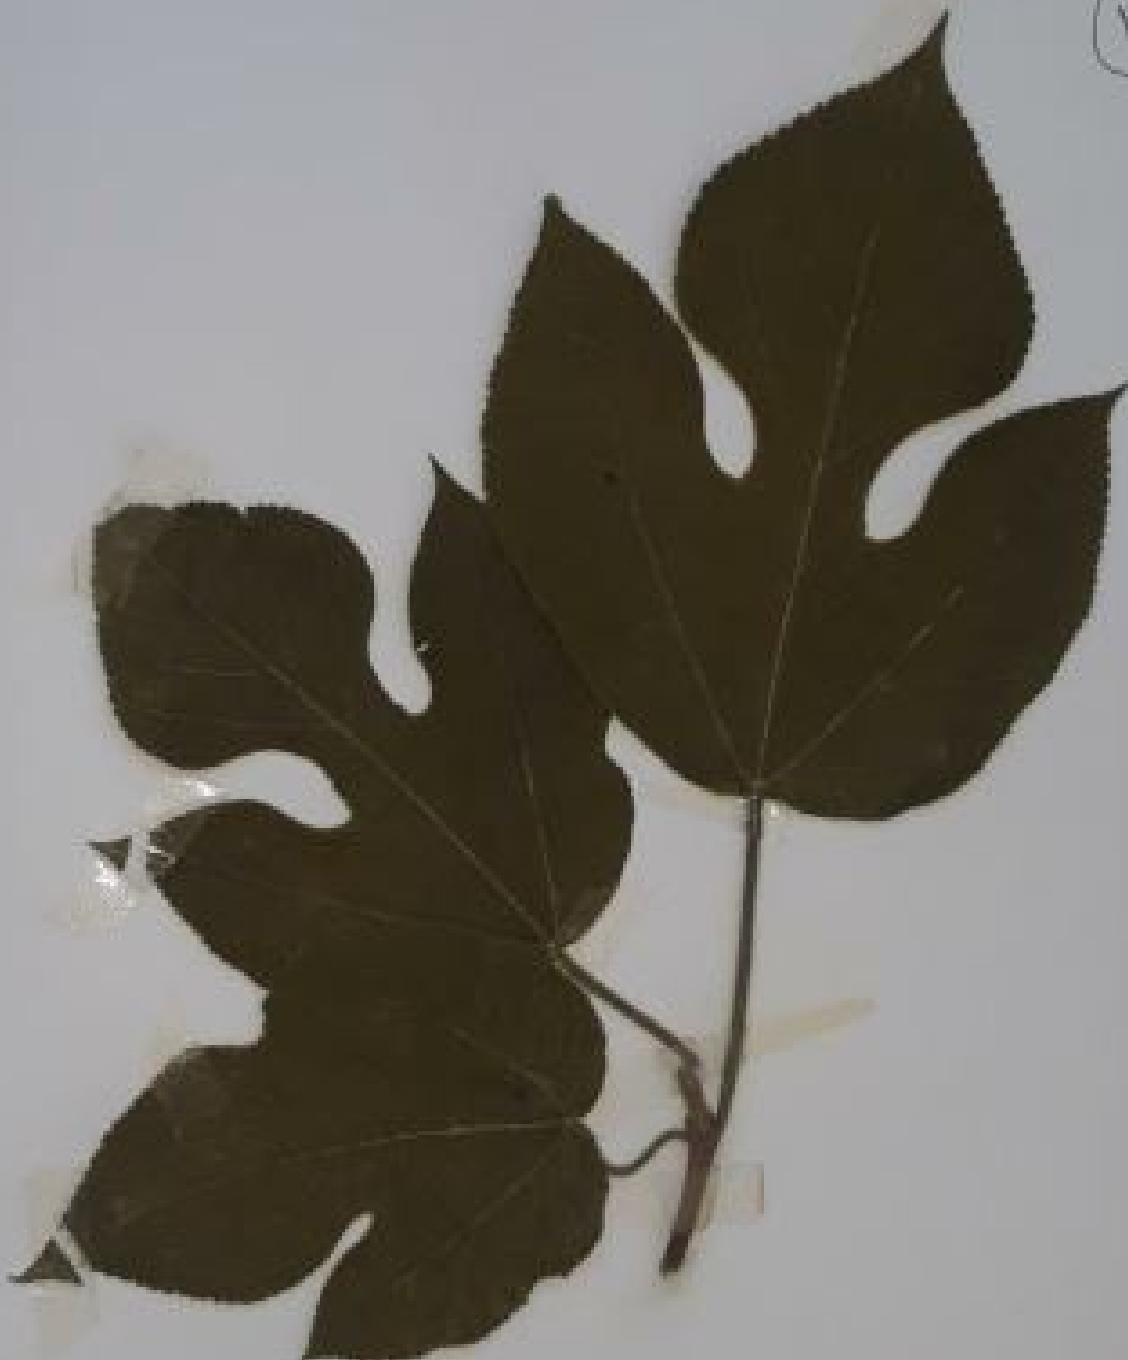

*Handwritten note:* 10/10/10

HERBARIUM  
DEPARTMENT OF BOTANY  
PMAS - ARID AGRICULTURE UNIVERSITY RAJAPURDI

Date \_\_\_\_\_

Accession No. Ec-4593 Number Specimen No. 11

Habit: \_\_\_\_\_

Botanical Name *Broussonetia pumila*

Local Name Kayson / Jangli Toot

Family: \_\_\_\_\_

Locality Gach

Date of Collection: \_\_\_\_\_

Collected By Arum Shah

Identified By Dr. Rajan

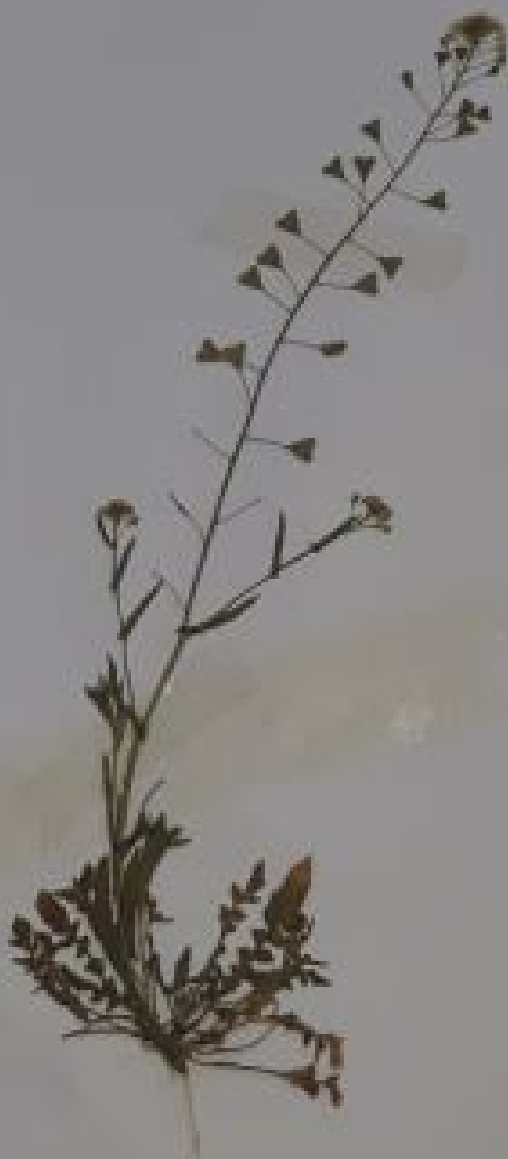

(32)

HERBARIUM  
DEPARTMENT OF BOTANY  
PMAS - ARID AGRICULTURE UNIVERSITY RAWALPINDI

Date \_\_\_\_\_  
Accession No. 6934 Voucher Specimen No. 12  
Host \_\_\_\_\_  
Botanical Name capsella bursa-pastoris  
Local Name \_\_\_\_\_  
Family Brassicaceae  
Locality Pallandri (Sull)  
Date of Collection \_\_\_\_\_  
Collected By Fazal  
Identified By Dr. Rehmat

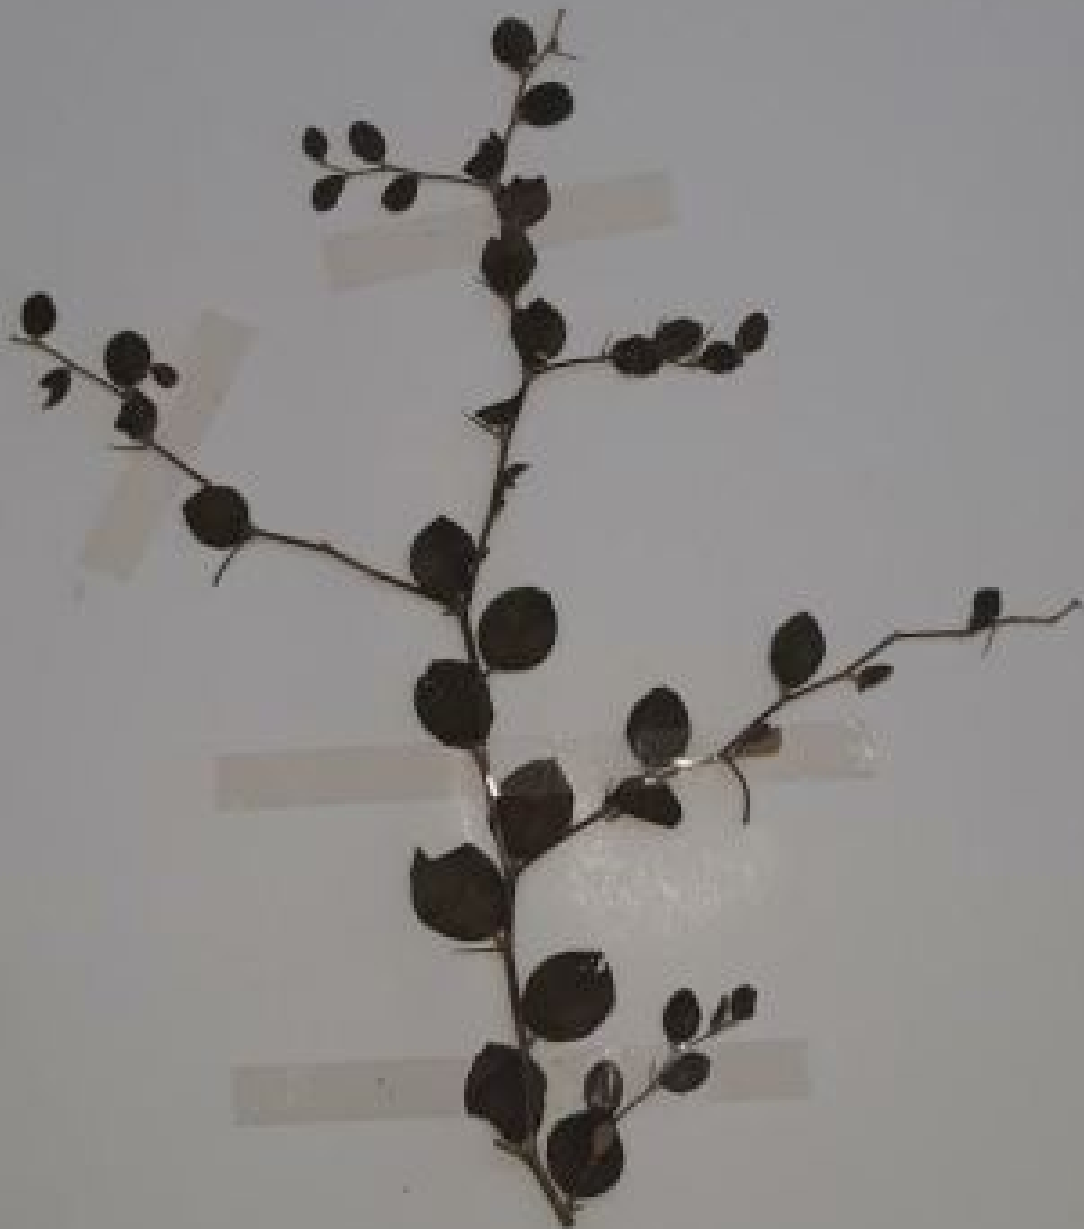

HERBARIUM  
DEPARTMENT OF BOTANY  
PAUNJ - AND AGRICULTURE UNIVERSITY RAWALPINDI

DATE \_\_\_\_\_

COLLECTOR Dr. R. K. Malik SPECIMEN No. 13

HOST \_\_\_\_\_

BOTANICAL NAME Cassia spicatarum

LOCAL NAME Garonda

FAMILY \_\_\_\_\_

LOCALITY Waliaanda (Sindh)

DATE OF COLLECTION \_\_\_\_\_

COLLECTED BY Fiaz

PREPARED BY Dr. Rohmat

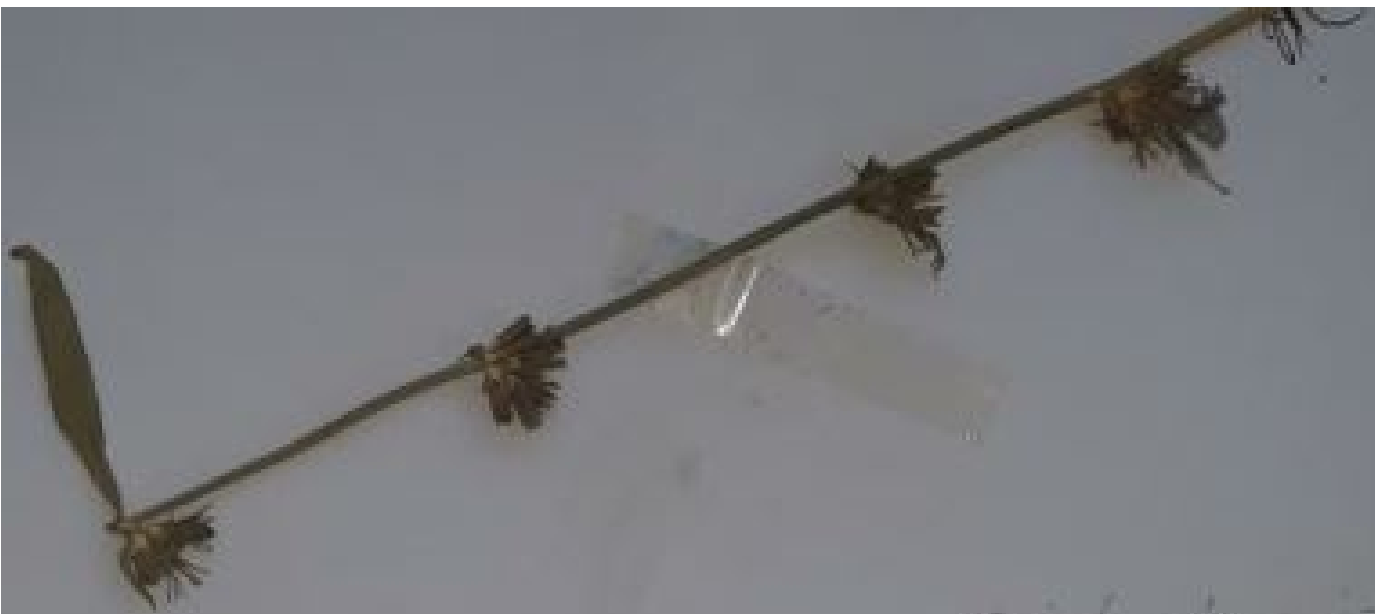

*Cichorium intybus*

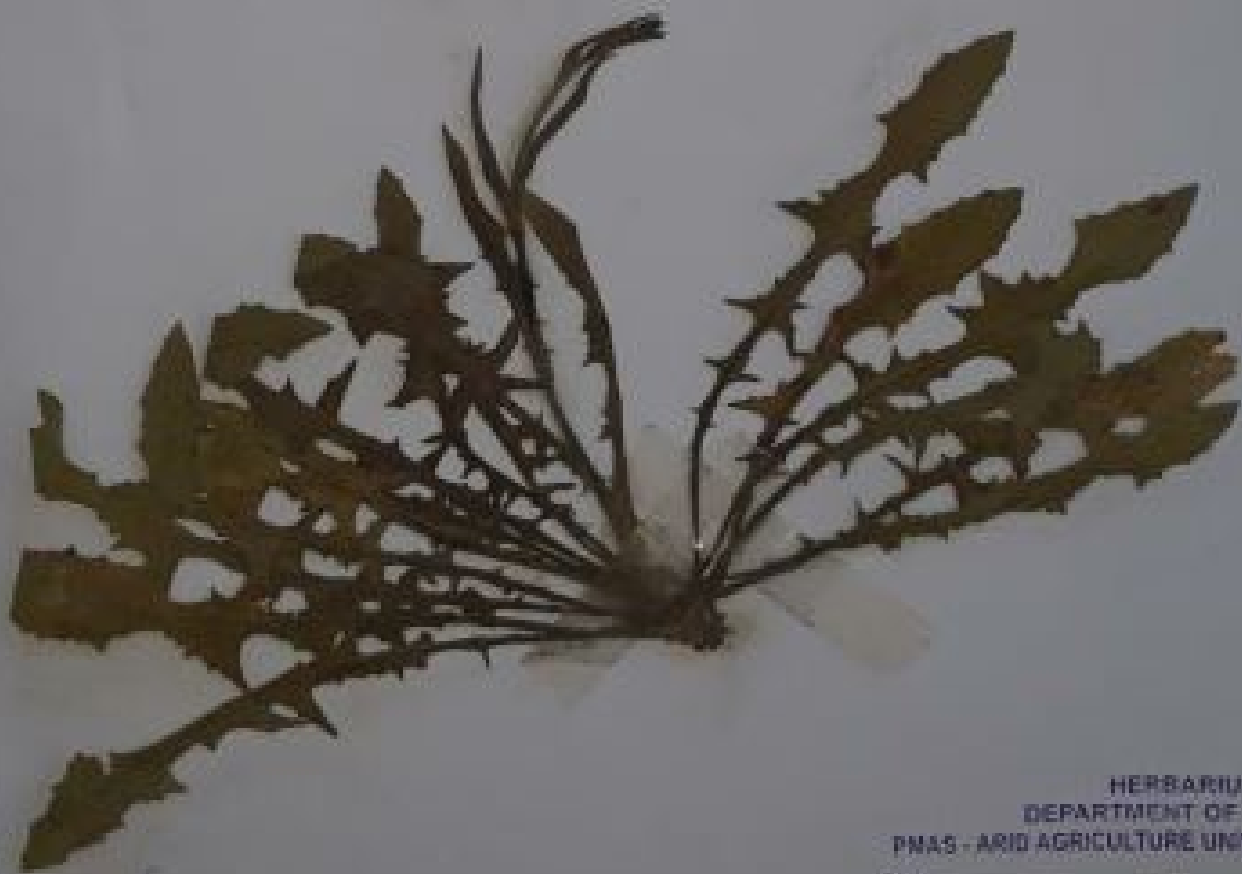

Fernon

HERBARIUM  
DEPARTMENT OF BOTANY  
PMAS - ARID AGRICULTURE UNIVERSITY RAWALPINDI

Date \_\_\_\_\_  
Accession No. EK 4978 Voucher Specimen No. 1  
Habit Herb  
Botanical Name Cichorium intybus  
Local Name Wadi / Chulhoy  
Family Asteraceae  
Locality Quary, Bahawalpur, Sahbanati  
Date of Collection \_\_\_\_\_  
Collected By FARAZ  
Submitted By Dr. Rehman

HERBARIUM  
 DEPARTMENT OF BOTANY  
 UNIVERSITY OF TORONTO

DATE: \_\_\_\_\_  
 COLLECTOR: Dalrymple No. 17  
 LOCALITY: \_\_\_\_\_  
 NAME: Calceolaria oppositifolia  
 ORDER: \_\_\_\_\_  
 FAMILY: Chacabacaceae (Cuscut.)  
 SUBFAMILY: \_\_\_\_\_  
 GENUS: Ferns  
 SPECIES: Dr. Sargent

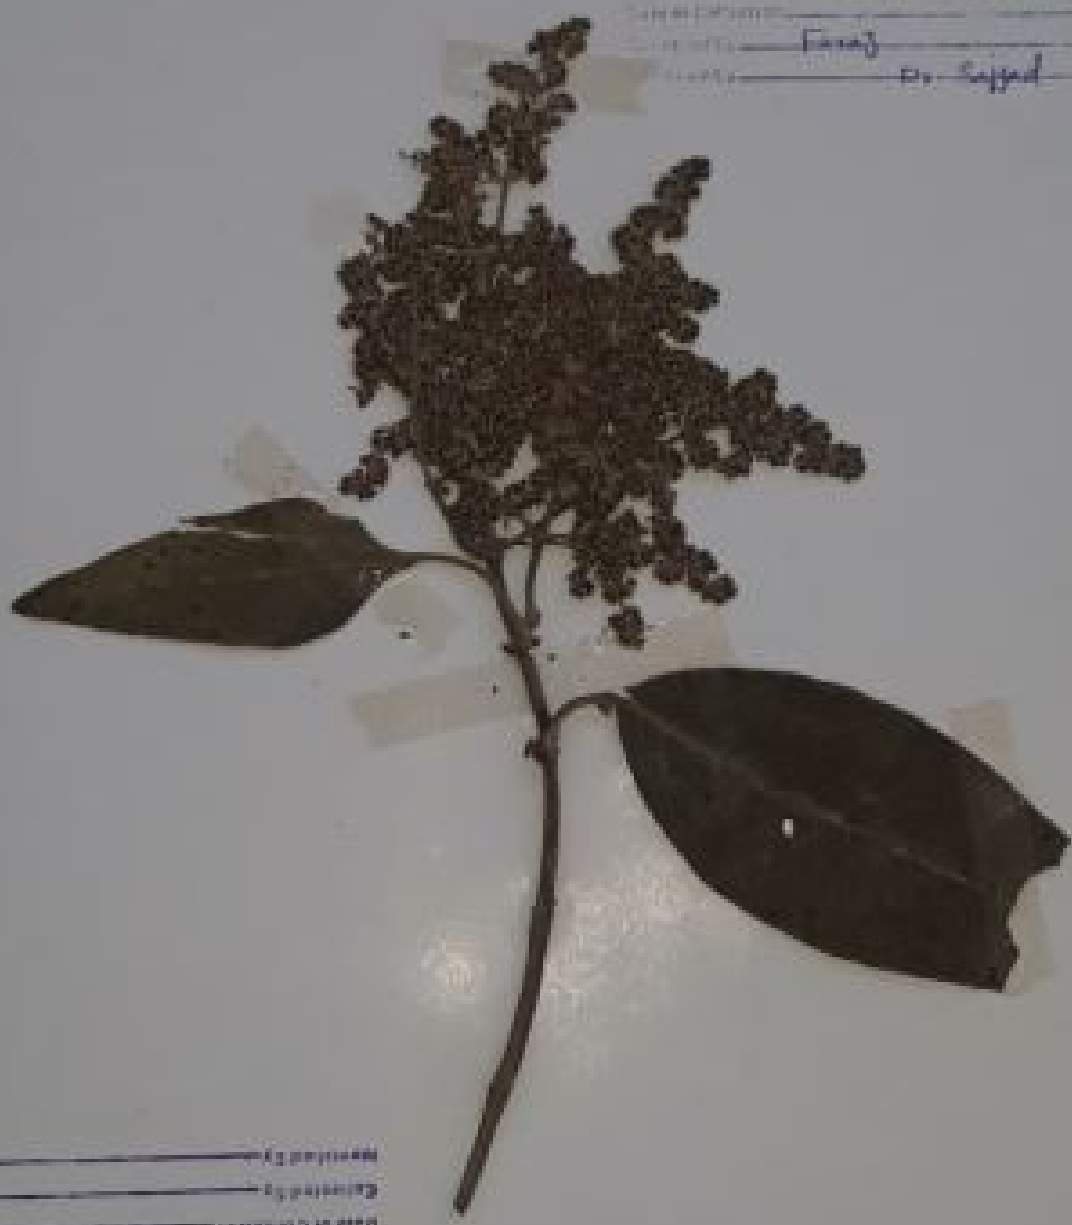

Number of specimens \_\_\_\_\_  
 Date of collection \_\_\_\_\_  
 Locality \_\_\_\_\_  
 Name of collector \_\_\_\_\_  
 Name of plant \_\_\_\_\_  
 Order \_\_\_\_\_  
 Family \_\_\_\_\_  
 Genus \_\_\_\_\_  
 Species \_\_\_\_\_  
 Author \_\_\_\_\_  
 Date \_\_\_\_\_

*Calceolaria oppositifolia*

DEPARTMENT OF BOTANY  
 UNIVERSITY OF TORONTO

59

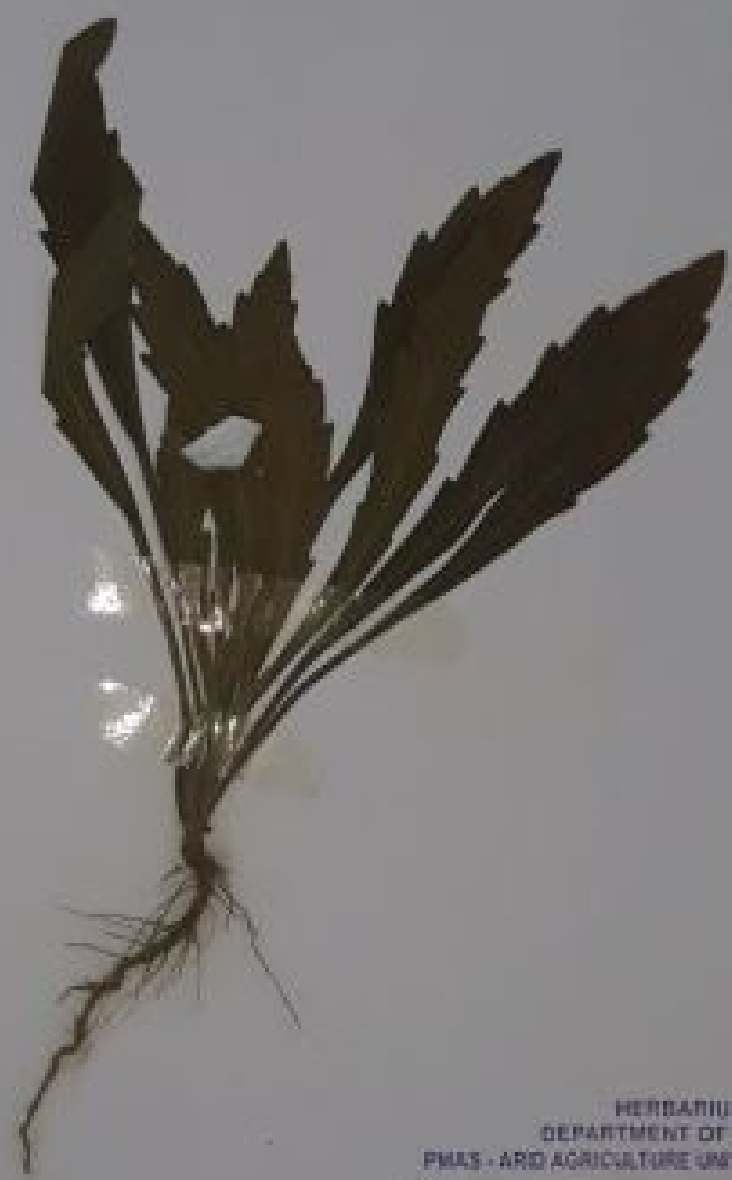

HERBARIUM  
DEPARTMENT OF BOTANY  
PMAS - ARD AGRICULTURE UNIVERSITY RAWALPINDI

Date \_\_\_\_\_  
Accession No. 11450 Voucher Specimen No. 18  
Name 11450  
Botanical Name Cassia condensida (L.)  
Local Name Barka / Sutha / Phul  
Family Leguminosae  
Locality \_\_\_\_\_  
Date of Collection \_\_\_\_\_  
Collected By \_\_\_\_\_  
Identified By \_\_\_\_\_

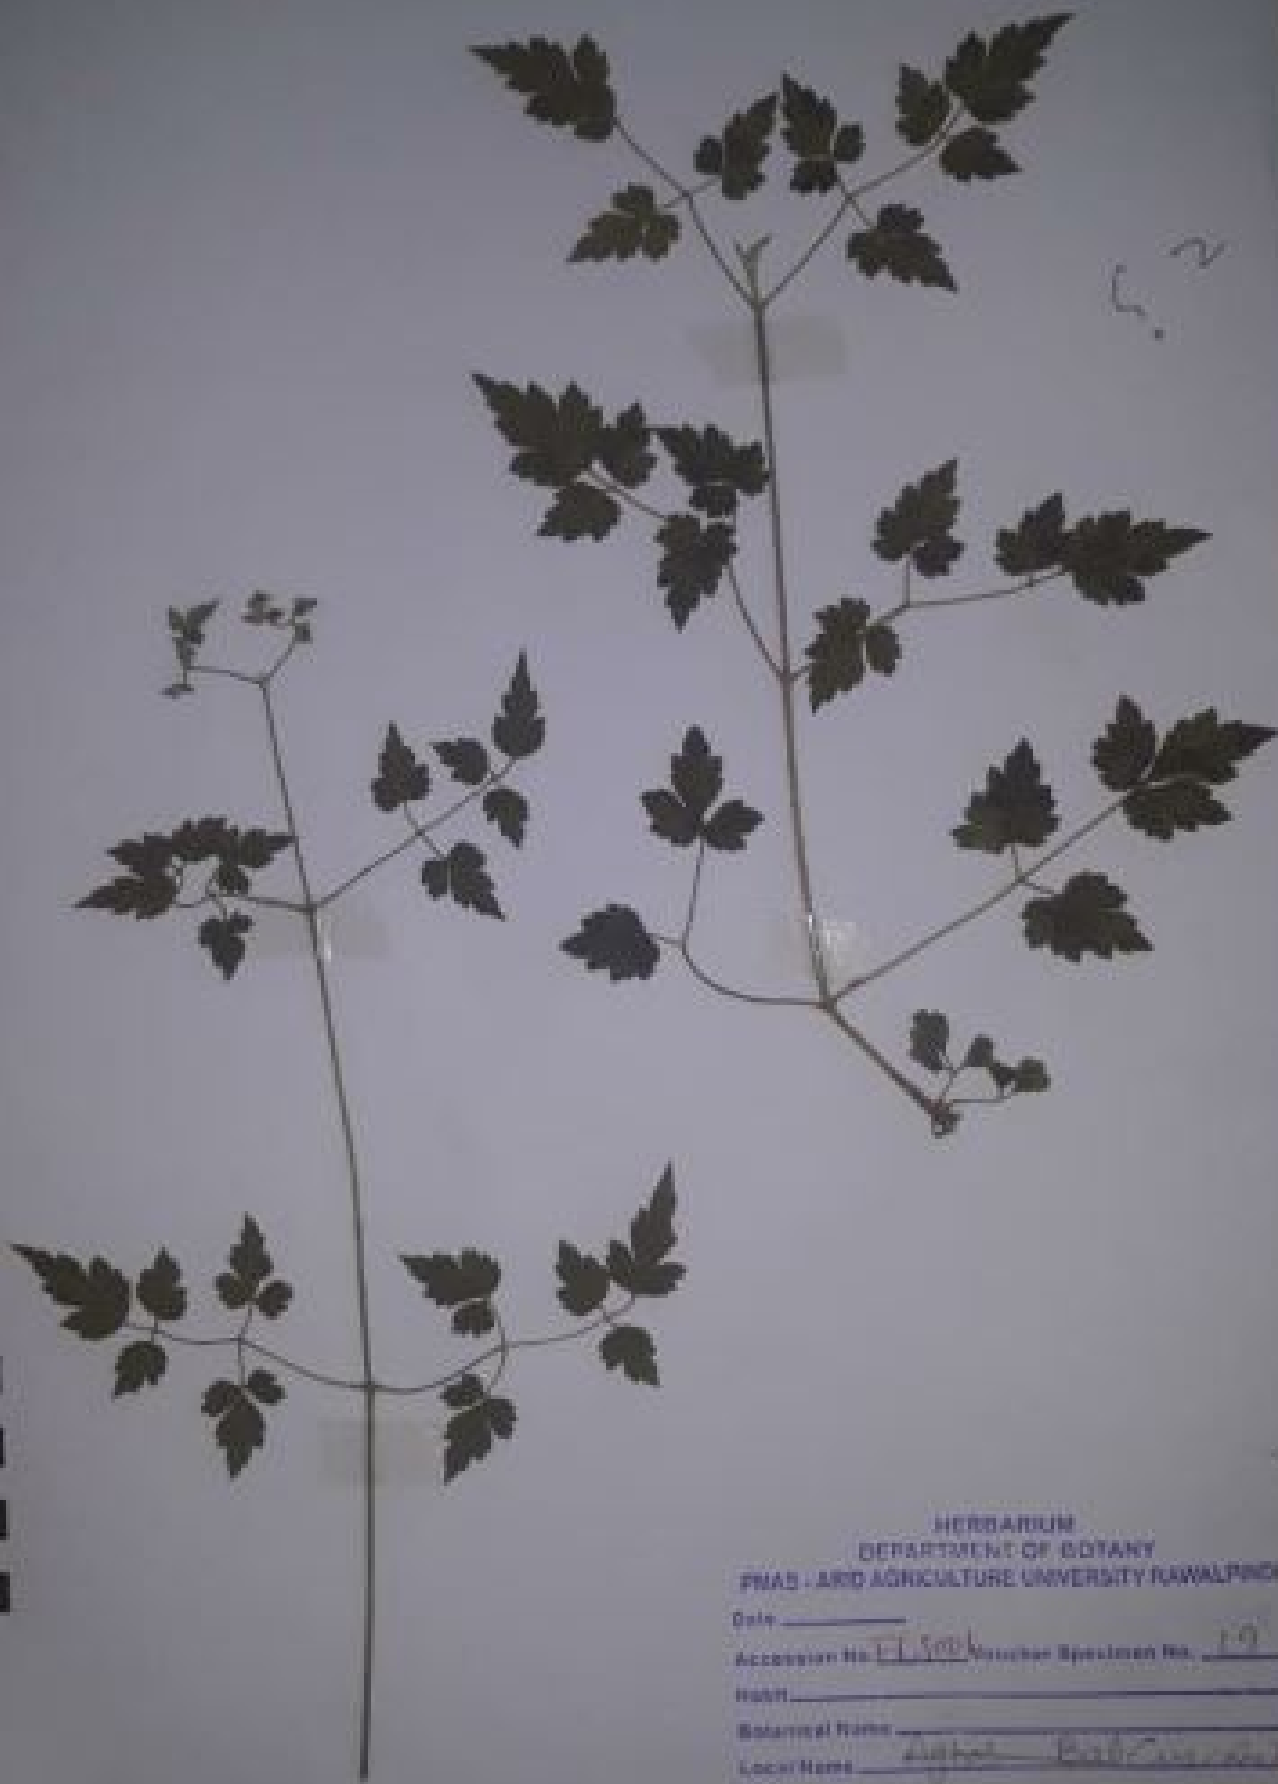

HERBARIUM  
DEPARTMENT OF BOTANY  
PMAS - ARID AGRICULTURE UNIVERSITY RAWALPINDI

Date \_\_\_\_\_

Accession No. EL 502 Herbarium Specimen No. 19

Host \_\_\_\_\_

Botanical Name \_\_\_\_\_

Local Name Aghar Bark Chiriyayla

Family \_\_\_\_\_

Locality Rawalpindi (Middle)

Date of Collection \_\_\_\_\_

Collected By F. S. Khan

Identified By Dr. P. Ahmad



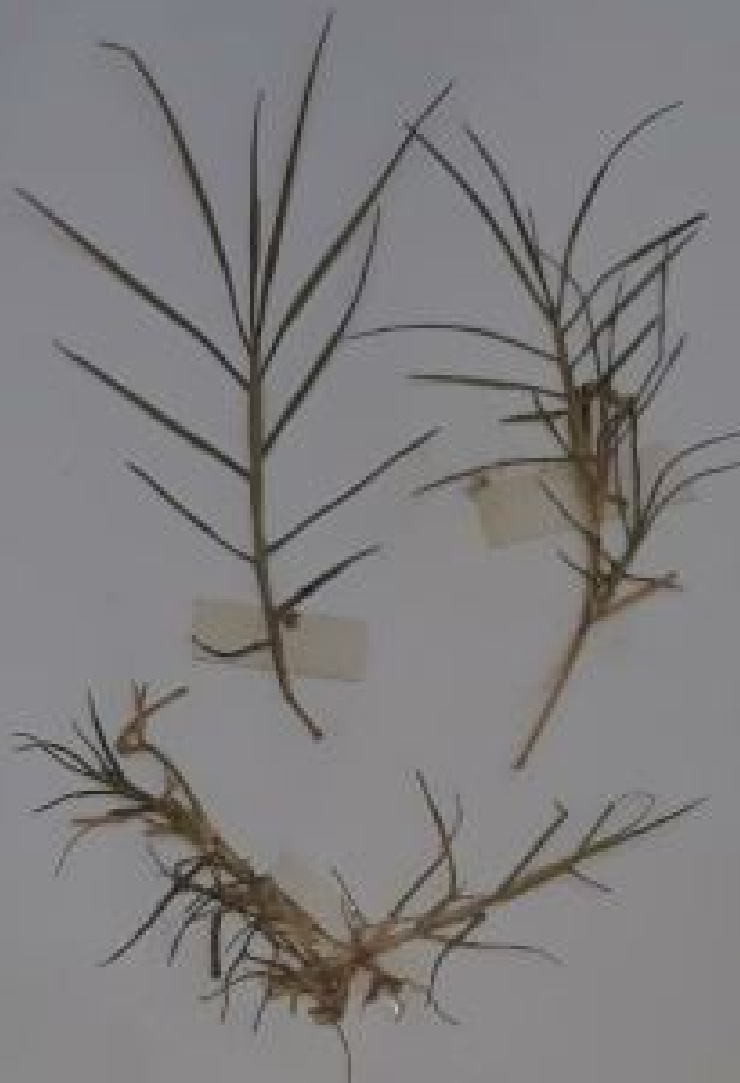

16

HERBARIUM  
DEPARTMENT OF BOTANY  
PMAS - ARID AGRICULTURE UNIVERSITY RAWALPINDI

Date \_\_\_\_\_

Accession No. 20502 Voucher Specimen No. 20

Plant \_\_\_\_\_

Botanical Name *Cynodon dactylon* L. Pers.

Local Name Khikhi

Family \_\_\_\_\_

Locality Numb Pe Panan (Gh)

Date of Collection \_\_\_\_\_

Collected By Fasih

Introduced By Dr. Rehmat

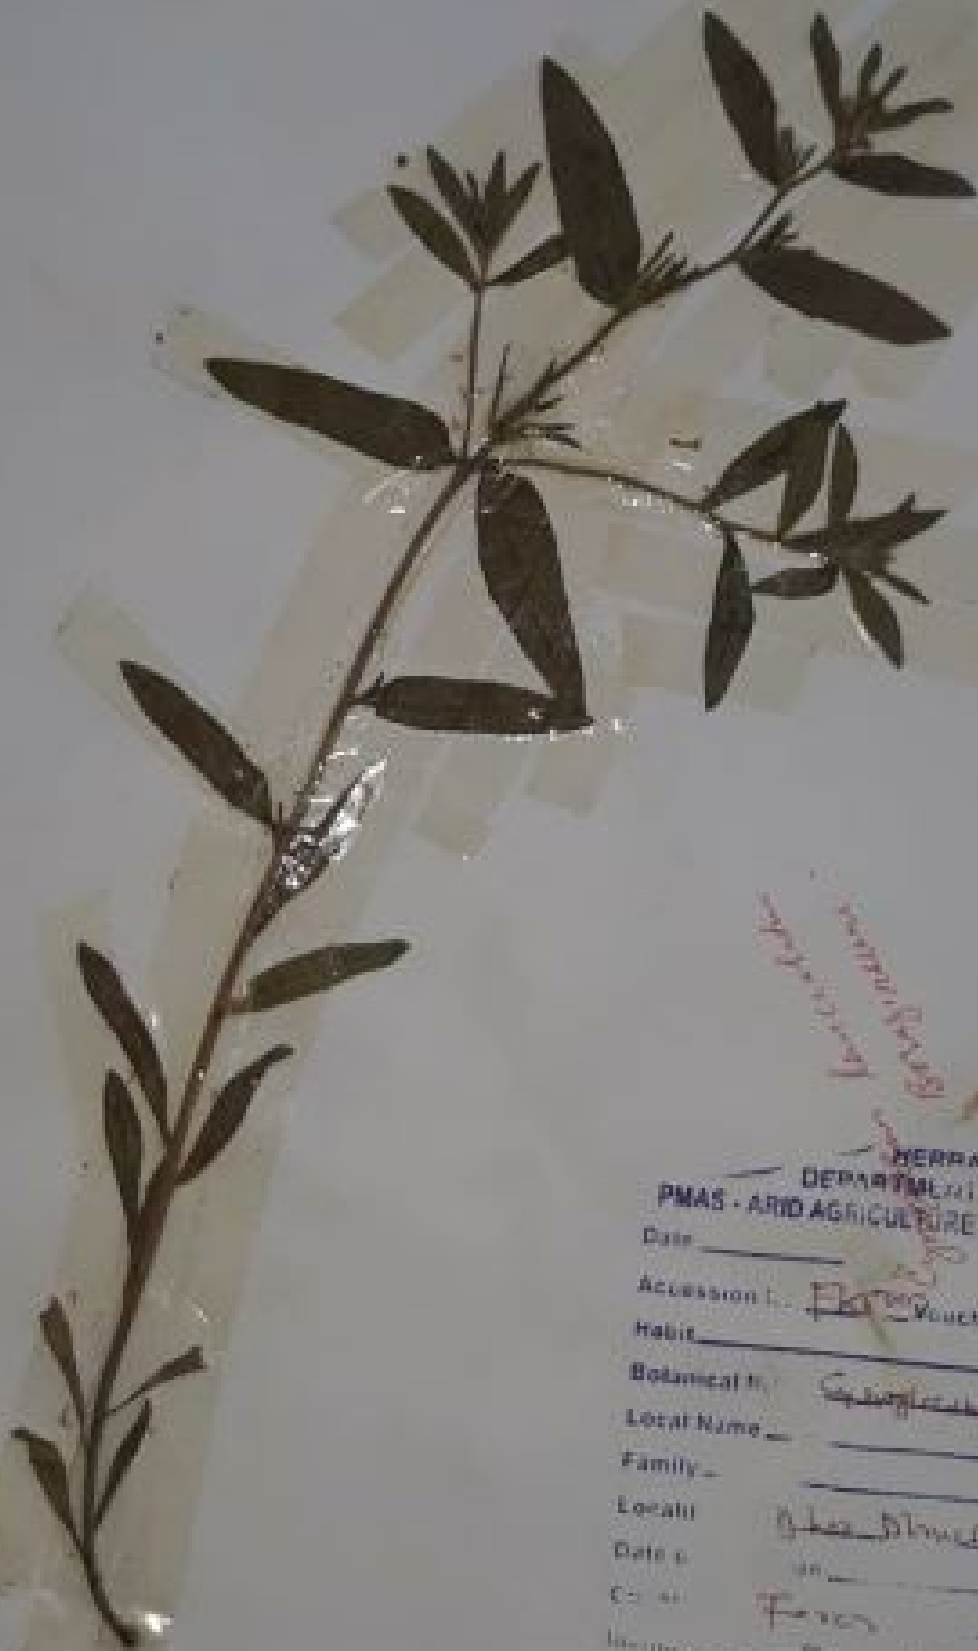

HERBARIUM  
DEPARTMENT OF BOTANY  
PMAS - ARID AGRICULTURE UNIVERSITY RAWALPINDI

Date \_\_\_\_\_  
Accession No. Flora Voucher Specimen No. 24  
Habit \_\_\_\_\_  
Botanical No. Cynoplecton (Coccinellidae)  
Local Name \_\_\_\_\_  
Family \_\_\_\_\_  
Locality Chas. Ahmad (Swat)  
Date of collection \_\_\_\_\_  
Collector Farooq  
Number of sheets 02 Syds

C. 19

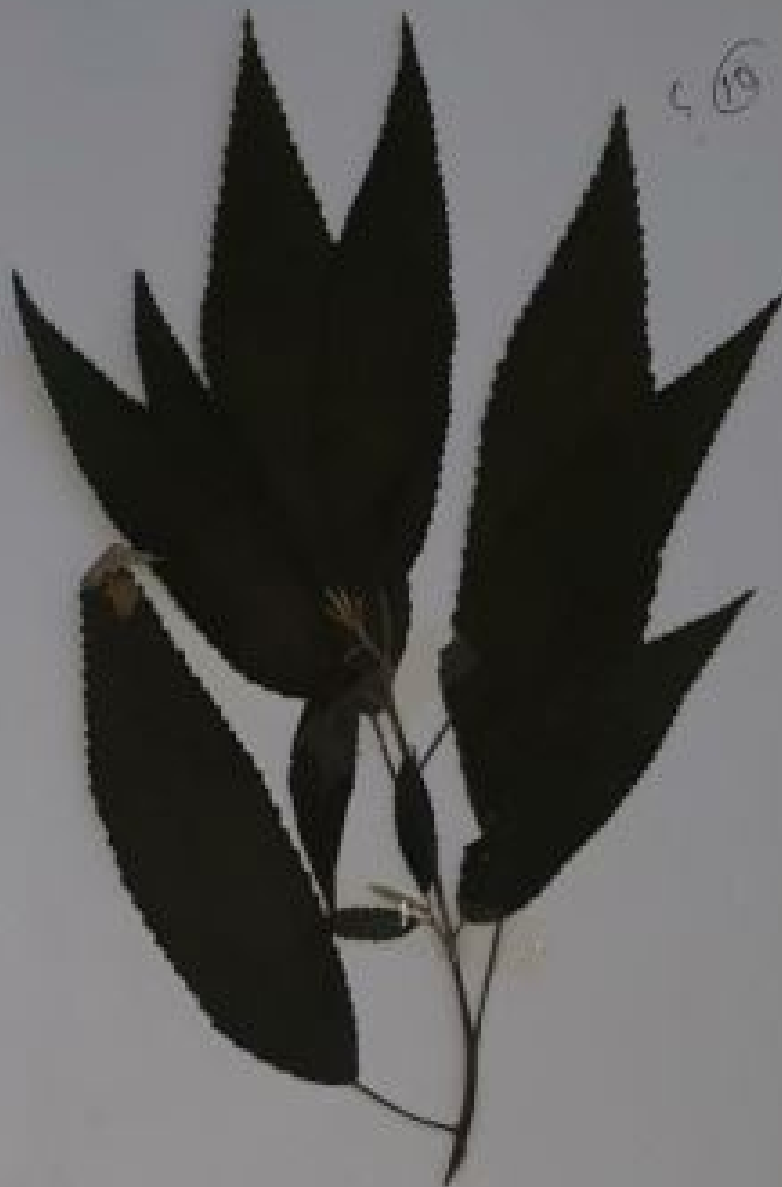

Scrubland

HERBARIUM  
DEPARTMENT OF BOTANY  
PMAS - ARID AGRICULTURE UNIVERSITY RAWALPINDI

Date \_\_\_\_\_

Accession No. 501 Collector Specimen No. 22

Height Shrub

Botanical Name *Dryopteris ~~indica~~ L.*

Local Name Jandari

Family Polypodiaceae

Locality Naxian (Sudh)

Date of Collection \_\_\_\_\_

Collected by Faqir

Identified by Dr. Ahmad

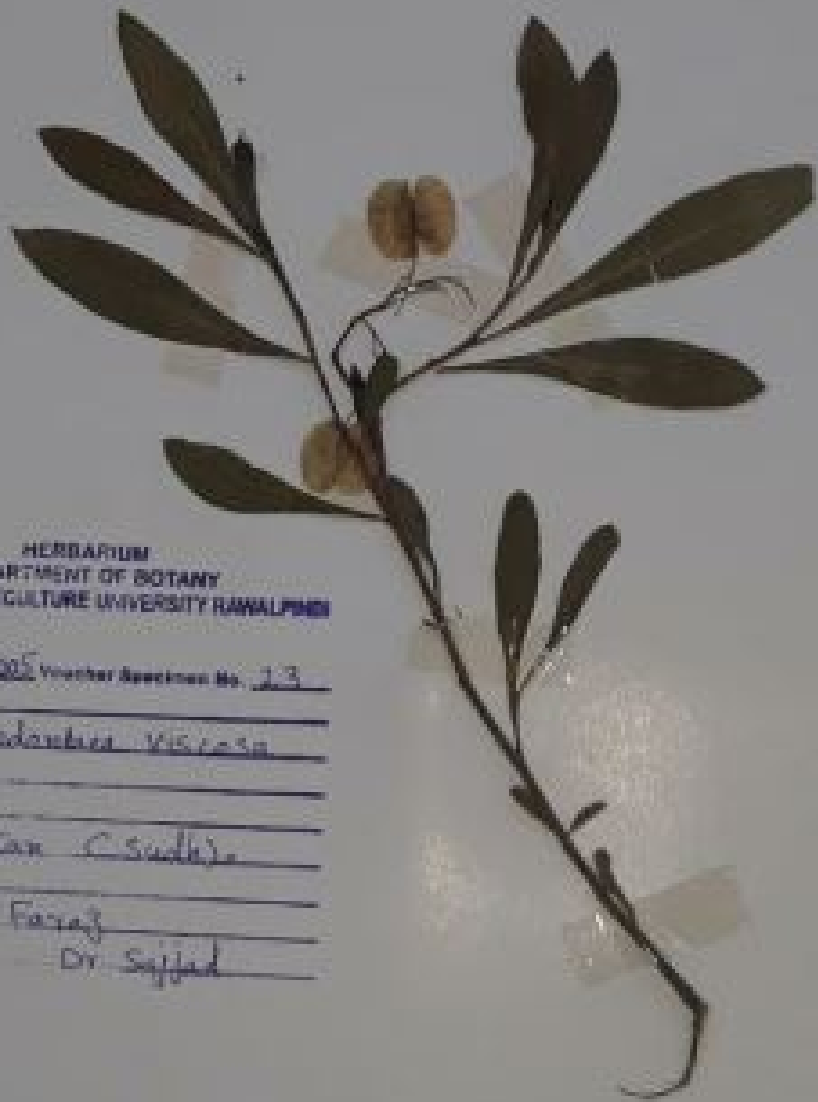

HERBARIUM  
DEPARTMENT OF BOTANY  
PAAS - ARI AGRICULTURE UNIVERSITY RAWALPINDI

Date \_\_\_\_\_

Accession No. 505 Voucher Specimen No. 23

Name \_\_\_\_\_

Botanical Name Dalmanella viscosa

Local Name \_\_\_\_\_

Family \_\_\_\_\_

Locality Ratan (Swat)

Date of Collection \_\_\_\_\_

Collector Fazal  
Dr. Sajjad

*Dalmanella viscosa*

(5)

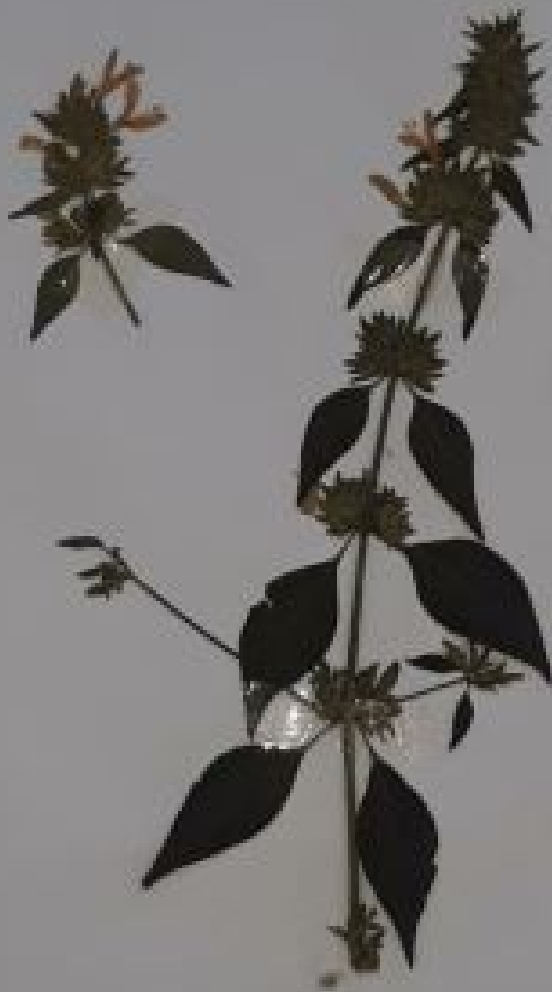

HERBARIUM  
DEPARTMENT OF BOTANY  
PMAS - ARID AGRICULTURE UNIVERSITY RAJAPUR  
Date \_\_\_\_\_  
Accession No. 5116 Voucher Specimen No. 24  
Habit Herb  
Botanical Name Meliplexis subrepens  
Loc of Name Sindh  
Family Asombaceae  
Locality Tarantal (Sindh)  
Date of Collection \_\_\_\_\_  
Collected By Fazal  
Identified By Dr. Rehman

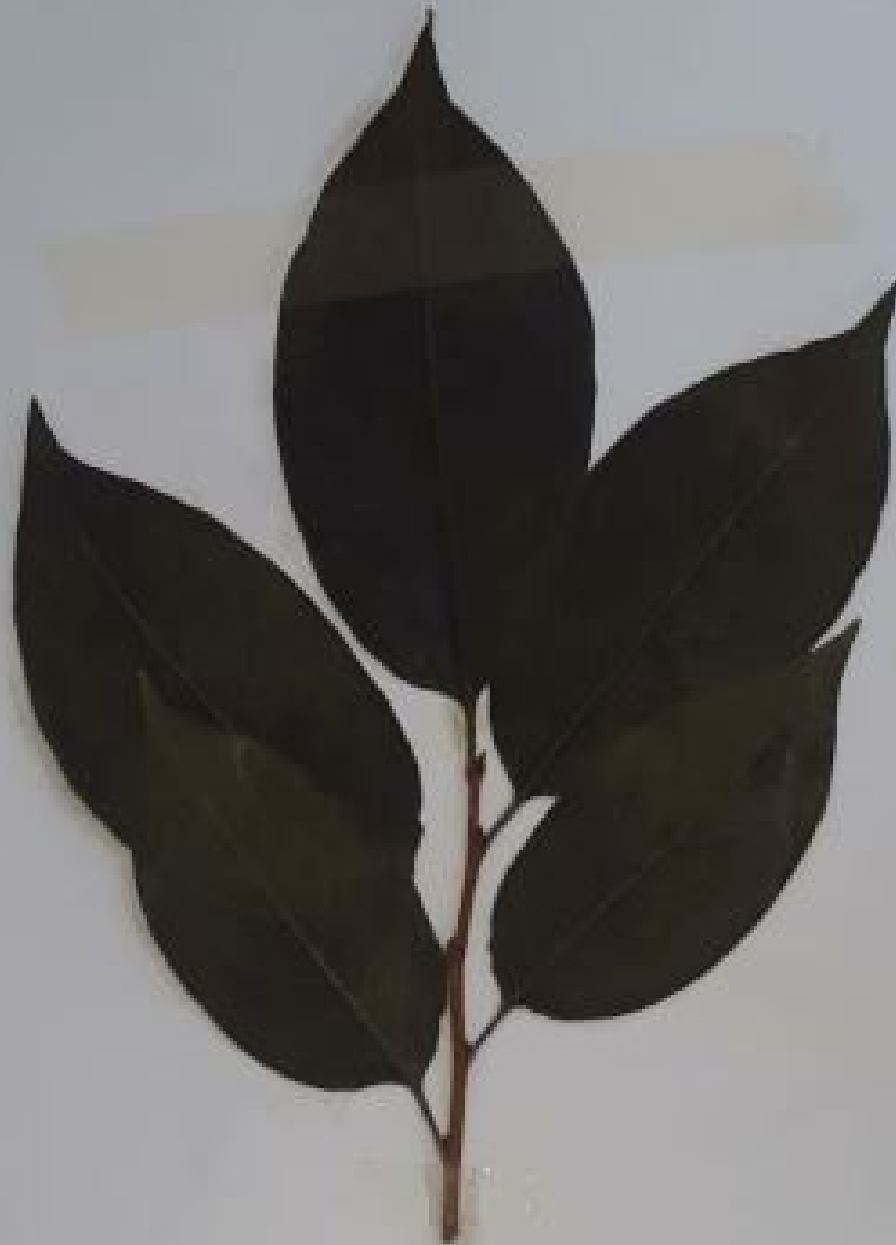

HERBARIUM  
DEPARTMENT OF BOTANY  
PWAS - ARID AGRICULTURE UNIVERSITY RAWALPINDI

Date \_\_\_\_\_

Accession No. 25 / 2016 / 2016

Habit \_\_\_\_\_

Botanical Name Diospyros

Local Name Chalk

Family \_\_\_\_\_

Locality Sargodha

Date of Collection \_\_\_\_\_

Collected By Farooq

Identified By Dr. Sajjad

HERBARIUM  
DEPARTMENT OF BOTANY  
INDIAN AGRICULTURAL UNIVERSITY

Date \_\_\_\_\_  
Accession No. 68004 V. No. 26  
Plant \_\_\_\_\_  
Botanical Name Dryopteris \_\_\_\_\_  
Local Name \_\_\_\_\_  
Family \_\_\_\_\_  
Locality \_\_\_\_\_  
Date of Collection \_\_\_\_\_  
Collector(s) T. S. Ramani  
Illustrated By S. R. Srinivasan

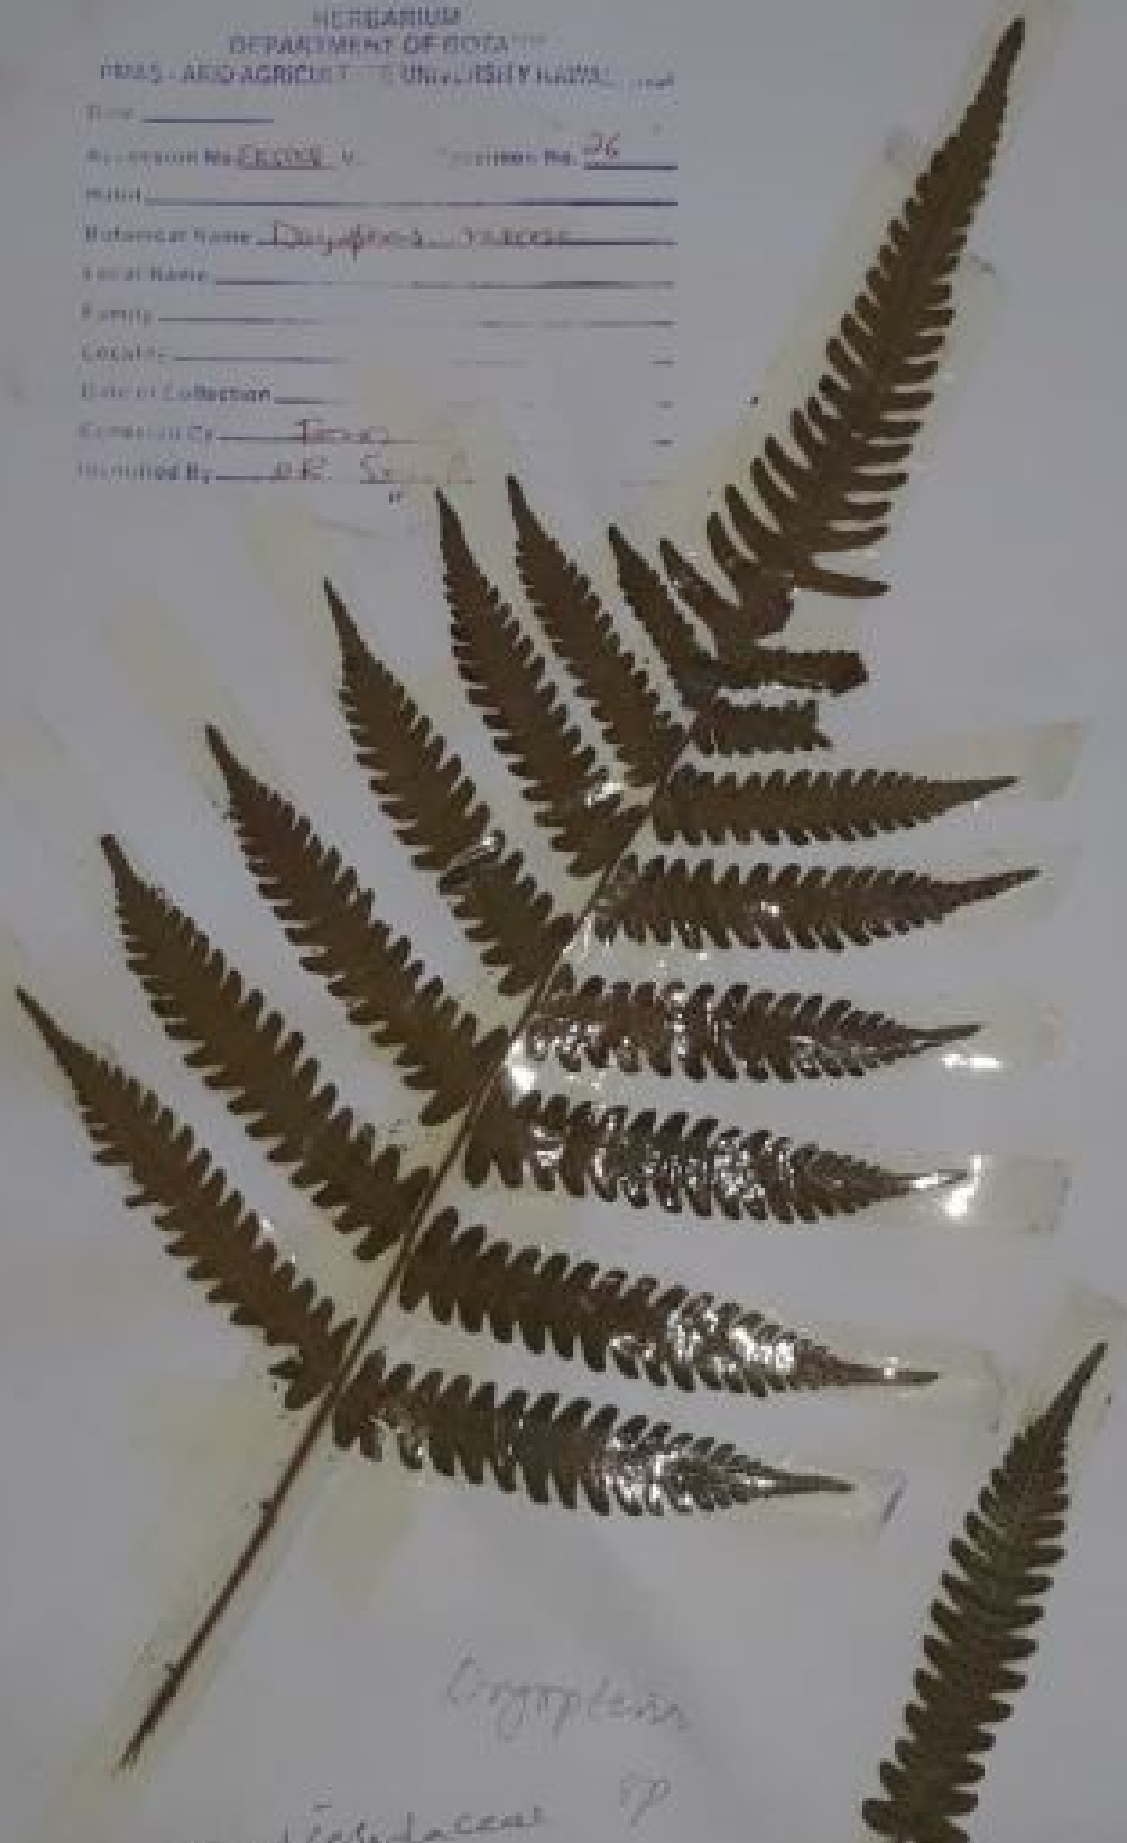

*Dryopteris*  
*Dryopteridaceae* ?  
*Dryopteris*  
*canadensis*

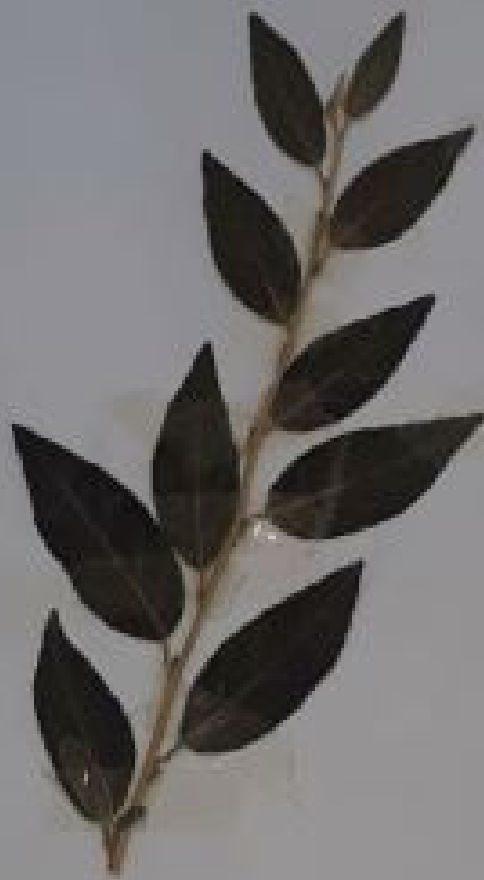

44

HERBARIUM  
DEPARTMENT OF BOTANY  
PWAS - ARID AGRICULTURE UNIVERSITY RAHWALPINDI

Date \_\_\_\_\_  
Accession No. 5029 Voucher Specimen No. 27  
Habit Shrub  
Botanical Name Elaeagnus Umbellata  
Local Name Charroli  
Family Elaeagnaceae  
Locality Baral (Cudd)  
Date of Collection \_\_\_\_\_  
Collected By Feroz  
Identified By Dr. Rehmat



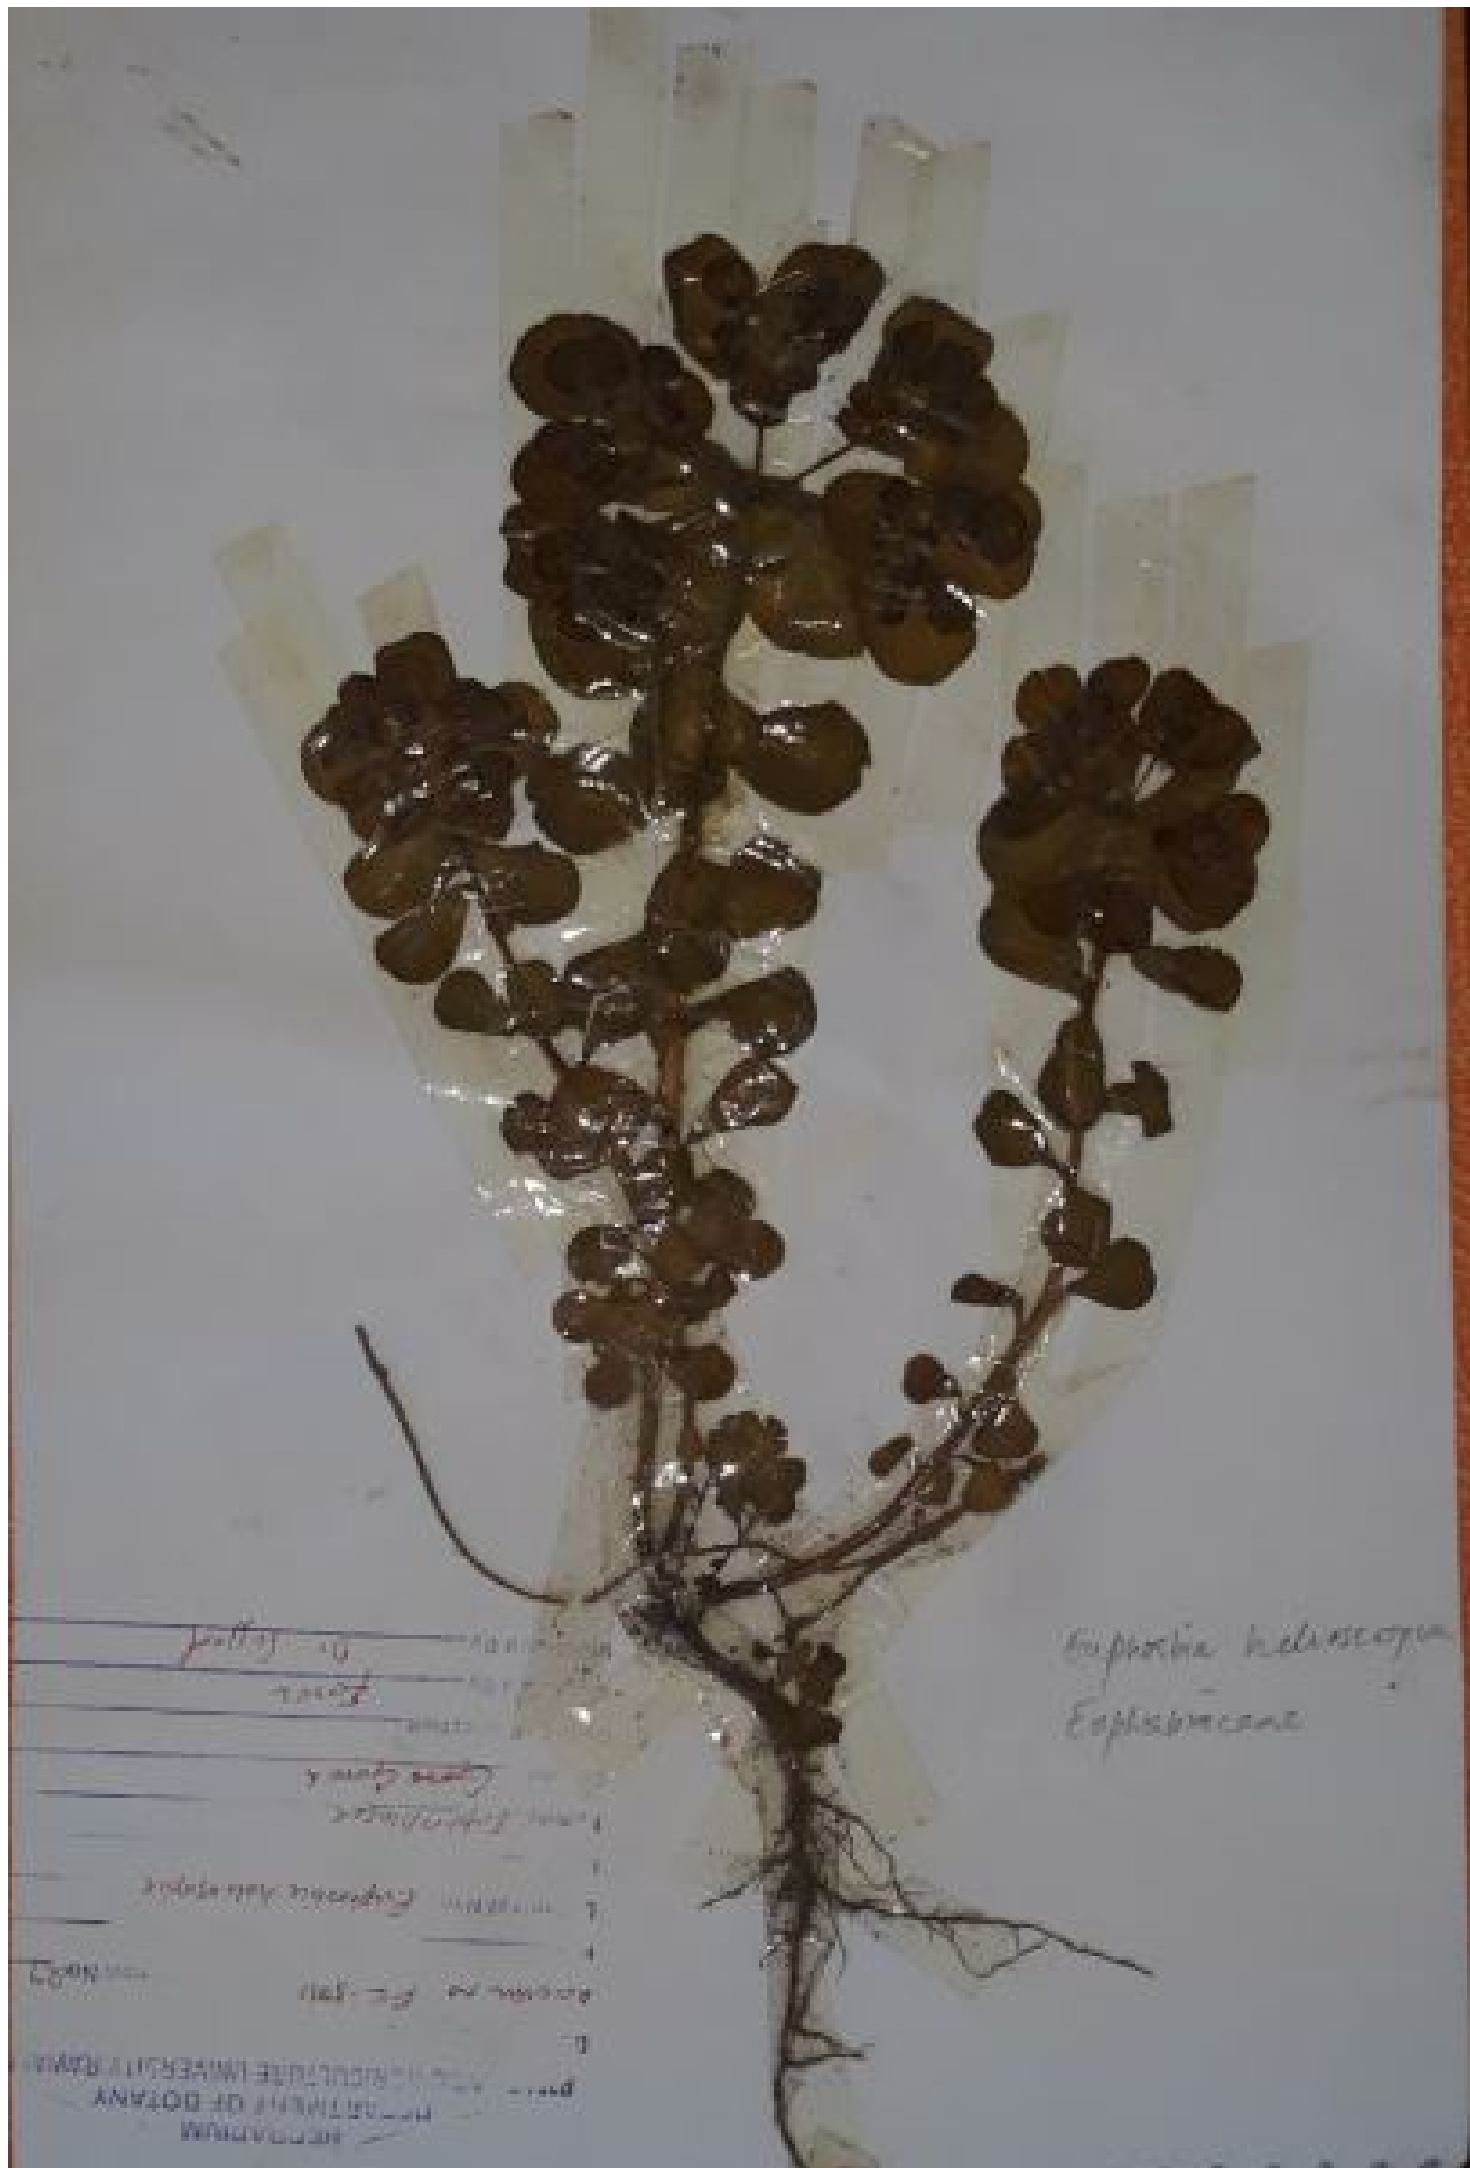

*Euphorbia helioscopia*  
Euphorbiaceae

HERBARIUM  
DEPARTMENT OF BOTANY  
UNIVERSITY OF TORONTO  
No. 102  
Euphorbia helioscopia  
Euphorbiaceae  
1890  
No. 102

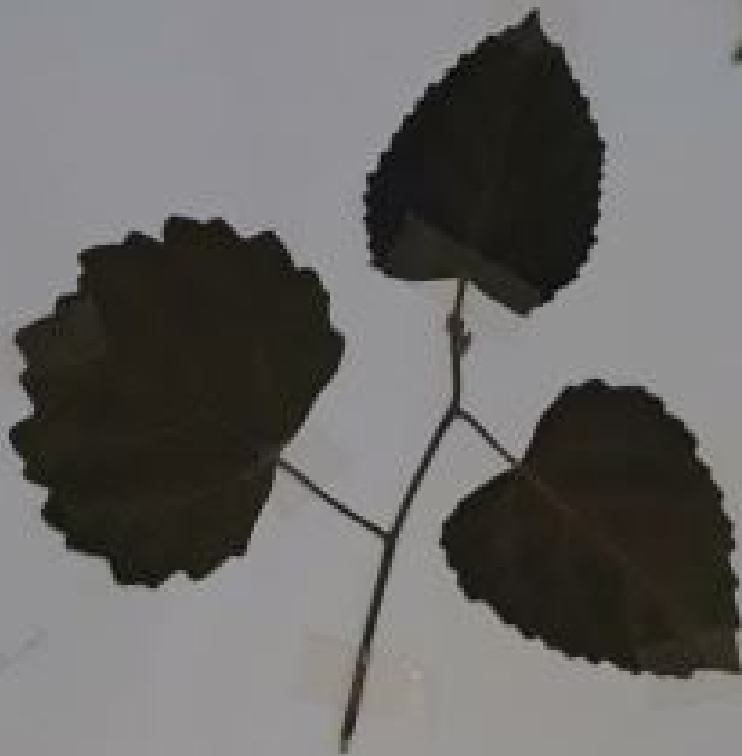

(3)

*Prunus*

Ficus palmata

HERRACHIUM  
DEPARTMENT OF BOTANY  
PMAS - ARID AGRICULTURE UNIVERSITY RAWALPINDI

Date \_\_\_\_\_

Accession No. 503 Voucher Specimen No. 31

Habit Tree

Botanical Name Ficus palmata Fourn.

Local Name Prunus

Family Moraceae

Locality Cher (Sudh)

Date of Collection \_\_\_\_\_

Collected By Farooq

Identified By Dr. Rehmat

(26)

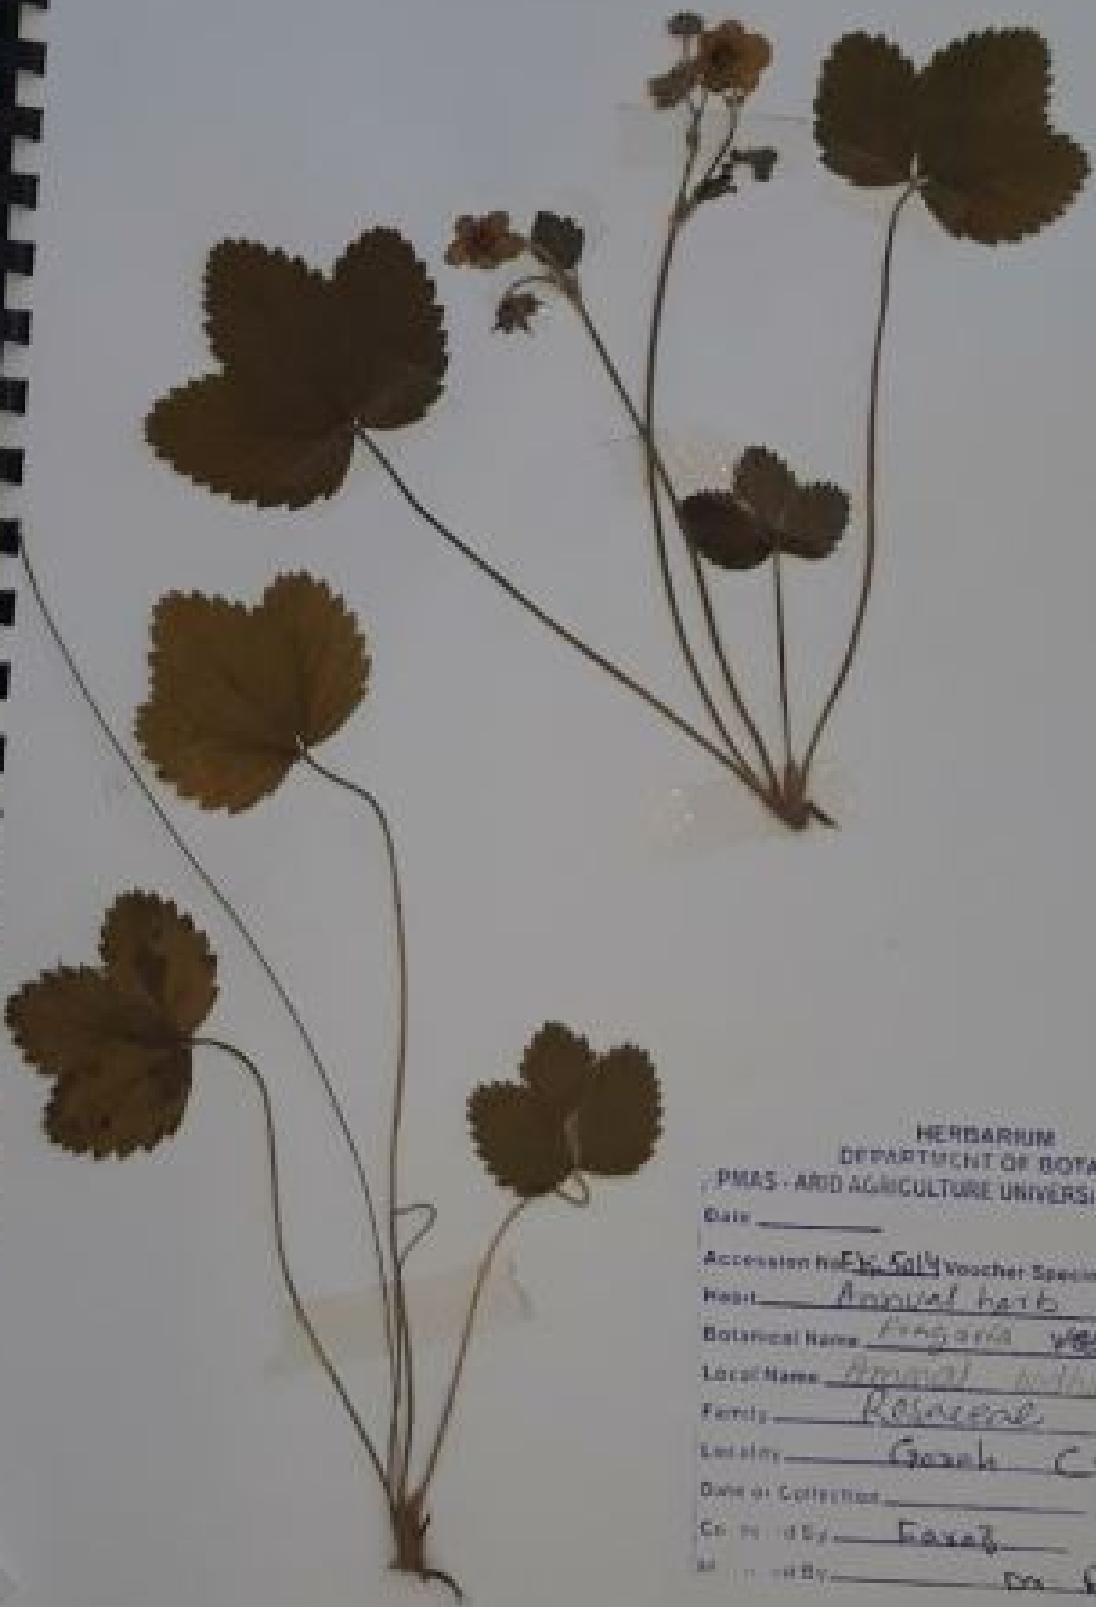

HERBARIUM  
 DEPARTMENT OF BOTANY  
 PMAS - ARID AGRICULTURE UNIVERSITY RAWALPINDI

Date \_\_\_\_\_

Accession No. Ex. 544 Voucher Specimen No. 32

Plant Annual herb

Botanical Name Fragaria vesca

Local Name Ammaul mulla

Family Rosaceae

Locality Gazak (Sudh)

Date of Collection \_\_\_\_\_

Collected By Fareez

Identified By Dr. R. H. Murt

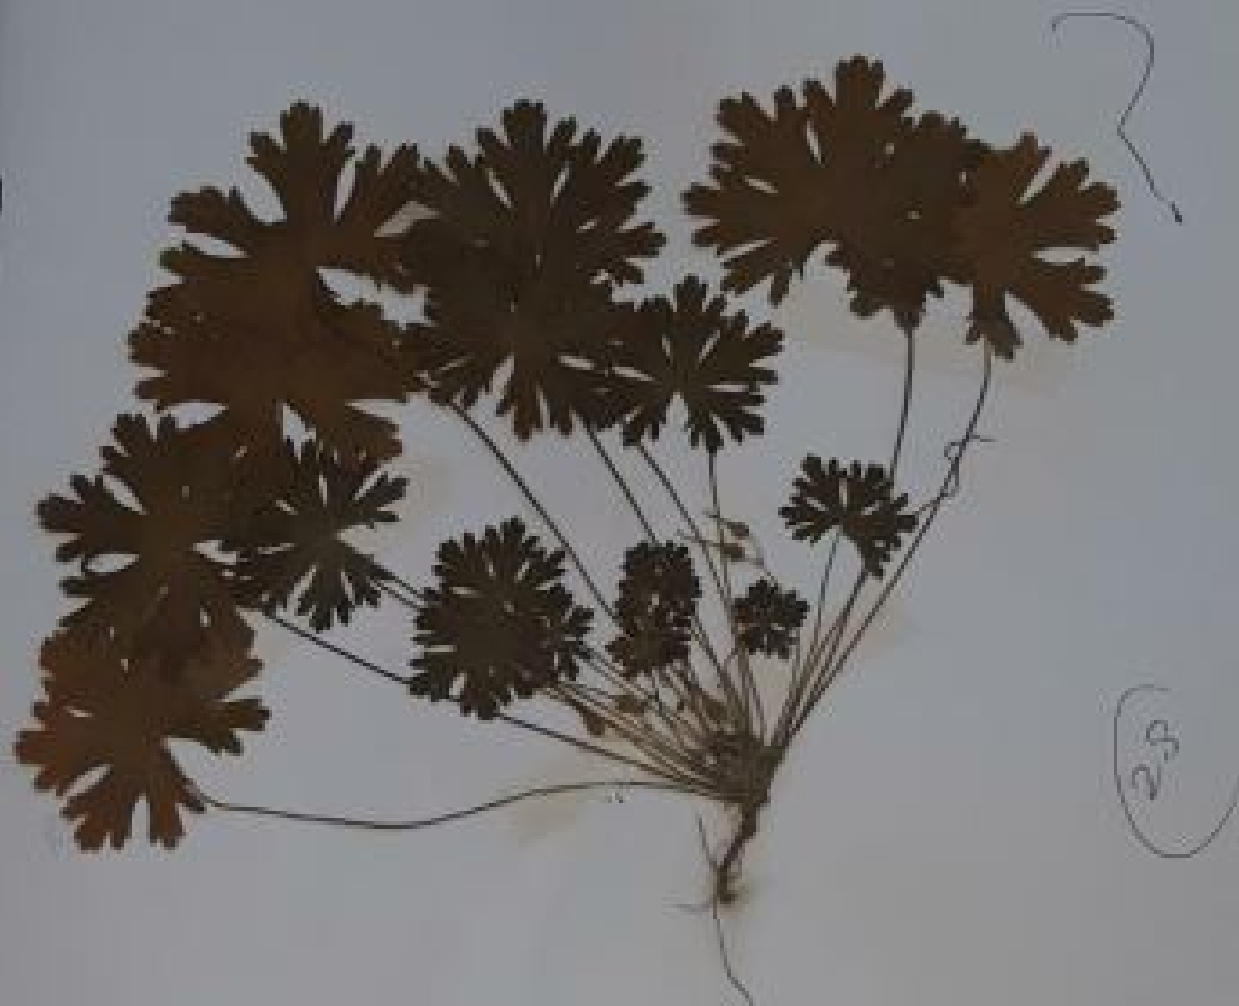

HERBARIUM  
DEPARTMENT OF BOTANY  
PMAS - ARID AGRICULTURE UNIVERSITY RAWALPINDI

Date \_\_\_\_\_  
Accession No. 5515, Voucher Specimen No. 23  
Habit Herb  
Botanical Name *Cresotium wallichianum*  
Local Name Khalo khalo (L.H.)  
Family Cucurbitaceae  
Locality Tawal Khal, CSUdho  
Date of Collection \_\_\_\_\_  
Collected By Fazal  
Identified By Dr. Rehman F.

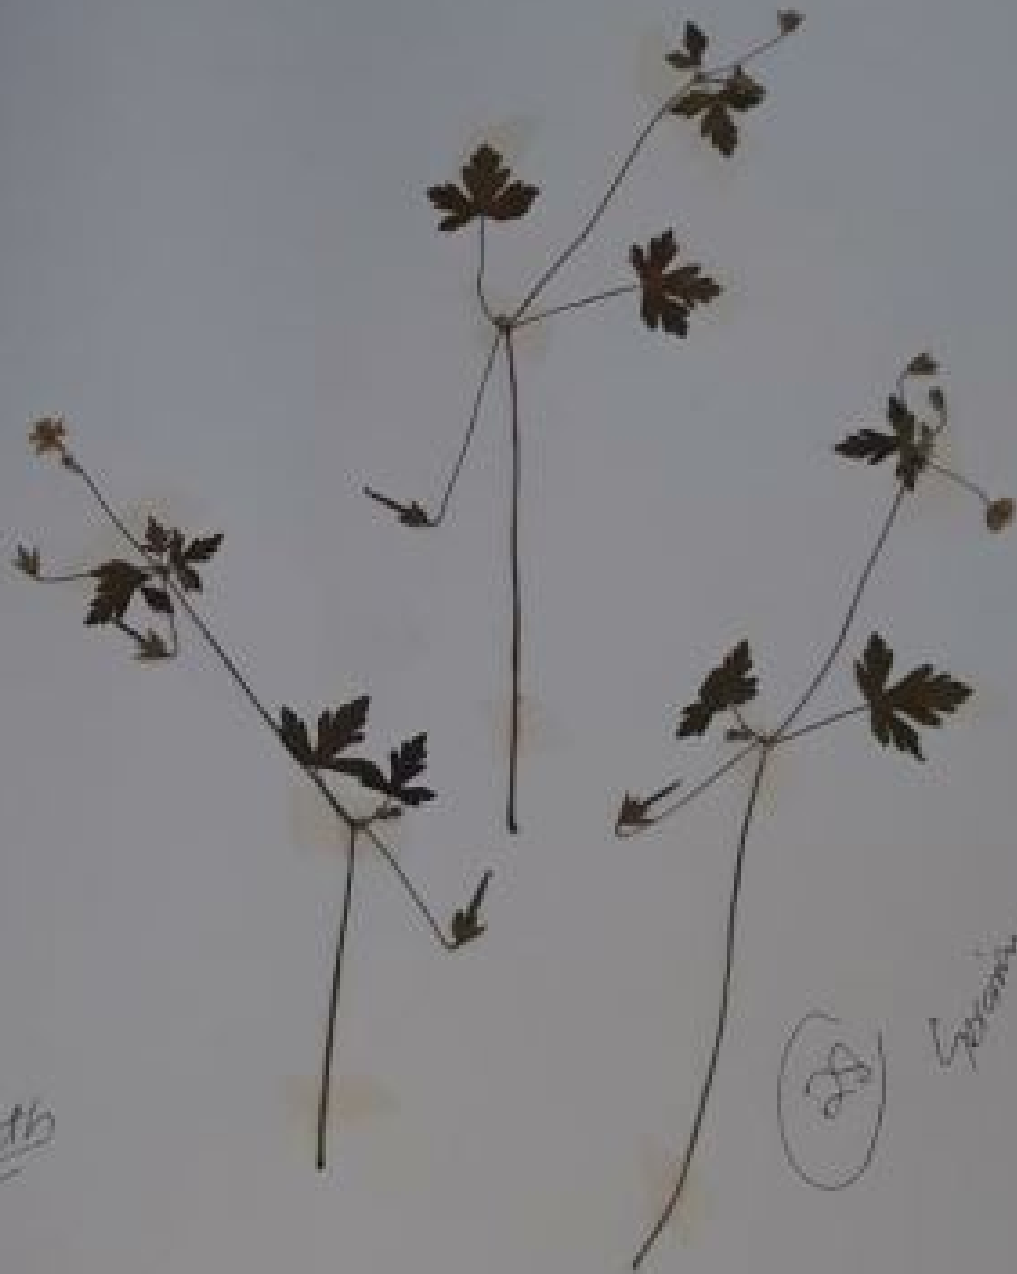

(2)

Spiraea

Pteris

has

HERBARIUM  
DEPARTMENT OF BOTANY  
PMAS - ARID AGRICULTURE UNIVERSITY RAWALPINDI

Date \_\_\_\_\_  
Accession No. PK-516 Voucher Specimen No. 34  
Habit \_\_\_\_\_  
Botanical Name Ceanothus refolius  
Local Name \_\_\_\_\_  
Family \_\_\_\_\_  
Locality Phulghari (the Sudhi)  
Date of Collection \_\_\_\_\_  
Collected By Faraz  
Identified By Dr. Rehanat

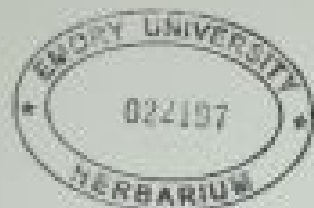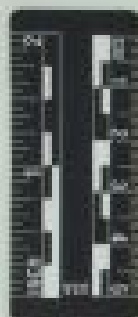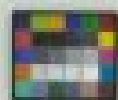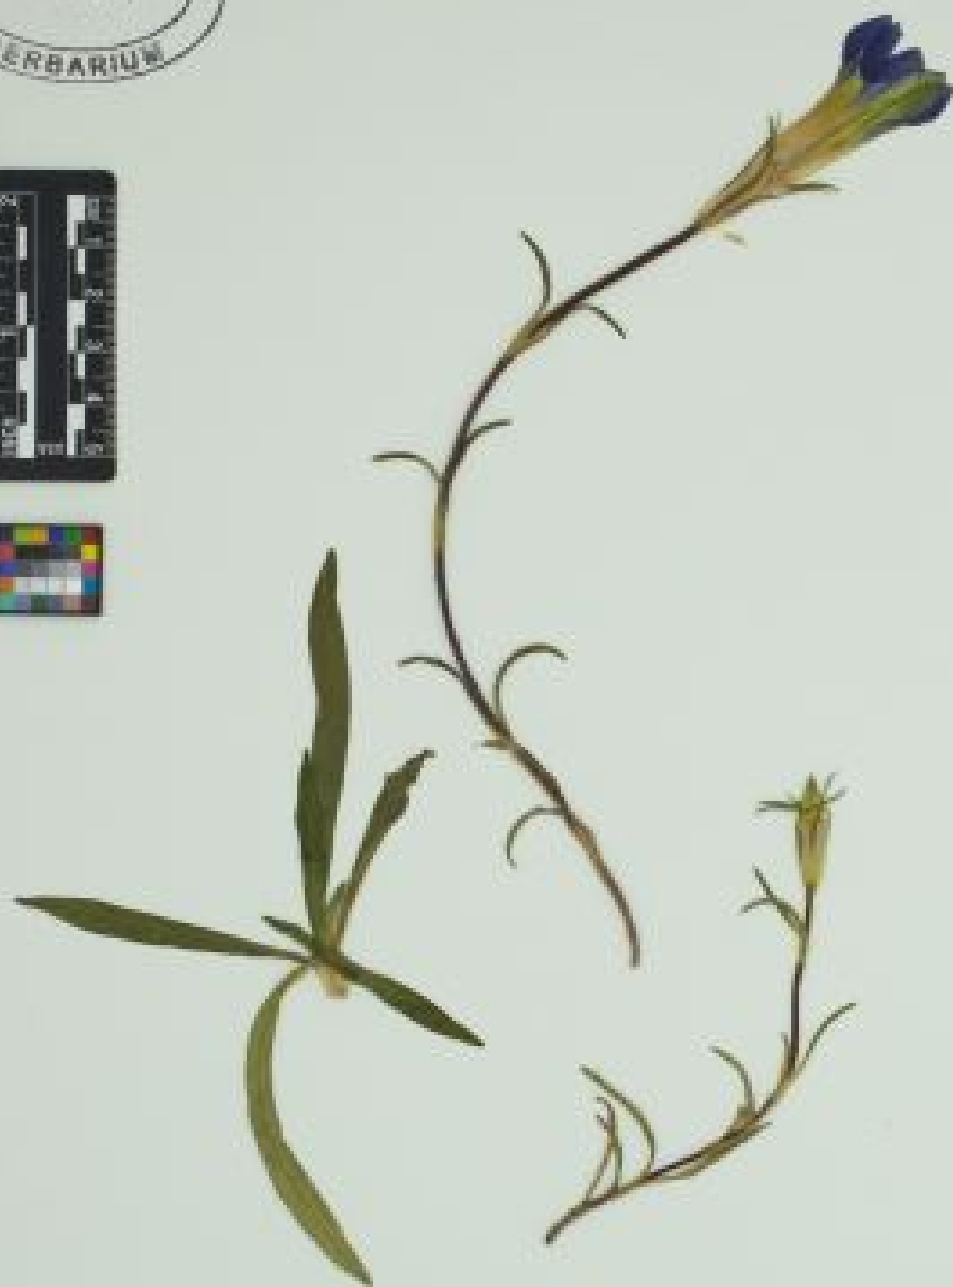

INCORPORATED INTO THE  
MEDICAL BOTANY SPECIAL COLLECTION

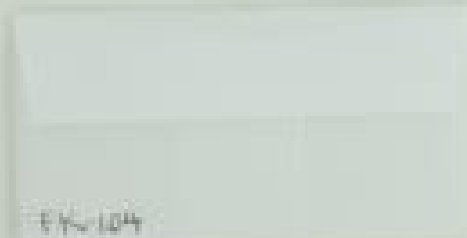

PK-104

EMORY UNIVERSITY HERBARIUM  
FLORA OF ISLAMIC REPUBLIC OF PAKISTAN

*Gentiana alberti* Griseb.

GENTIANACEAE

Gushk, Sulaiman, Azad Kashmir, Islamic Republic of Pakistan.

common, dry wild habitat

flowers blue in color, always

anti-infective, hypoglycemic, used for renal retention (local name)  
Noel Kamb

Mohammad Faiz Khan PK-104

3 June 2017

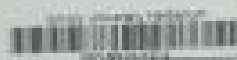

Michelle Liu

25 September 2017

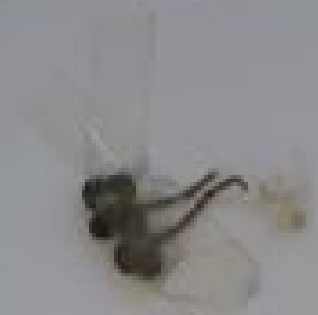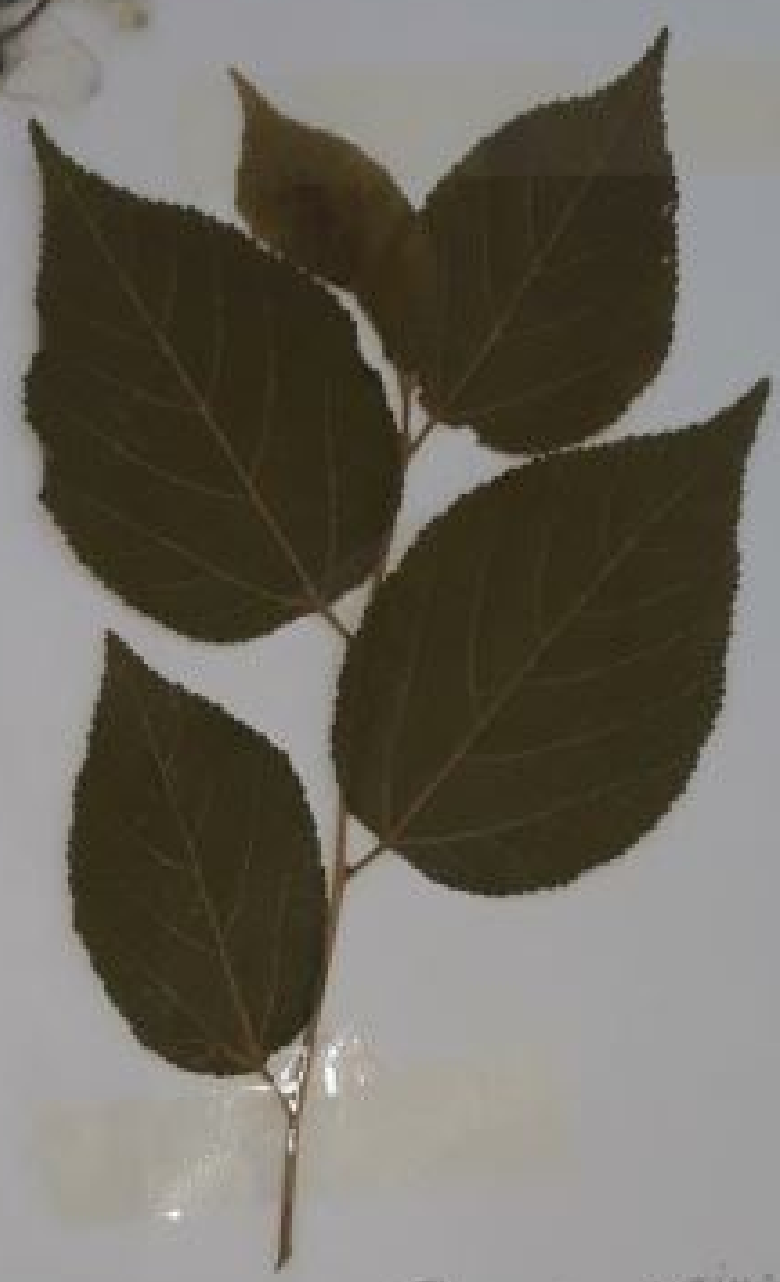

30

*Quercus optiva*

30

HERBARIUM  
DEPARTMENT OF BOTANY  
PMAS - ARIO AGRICULTURE UNIVERSITY RAWALPINDI

Date \_\_\_\_\_

Accession No. PK-508 Voucher Specimen No. 36

Name \_\_\_\_\_

Botanical Name *Quercus optiva*

Local Name                     

Family \_\_\_\_\_

Locality Nalanda (Sudu)

Date of Collection \_\_\_\_\_

Collected By Fazal

Identified by Dr. Rahimul

HERBARIUM

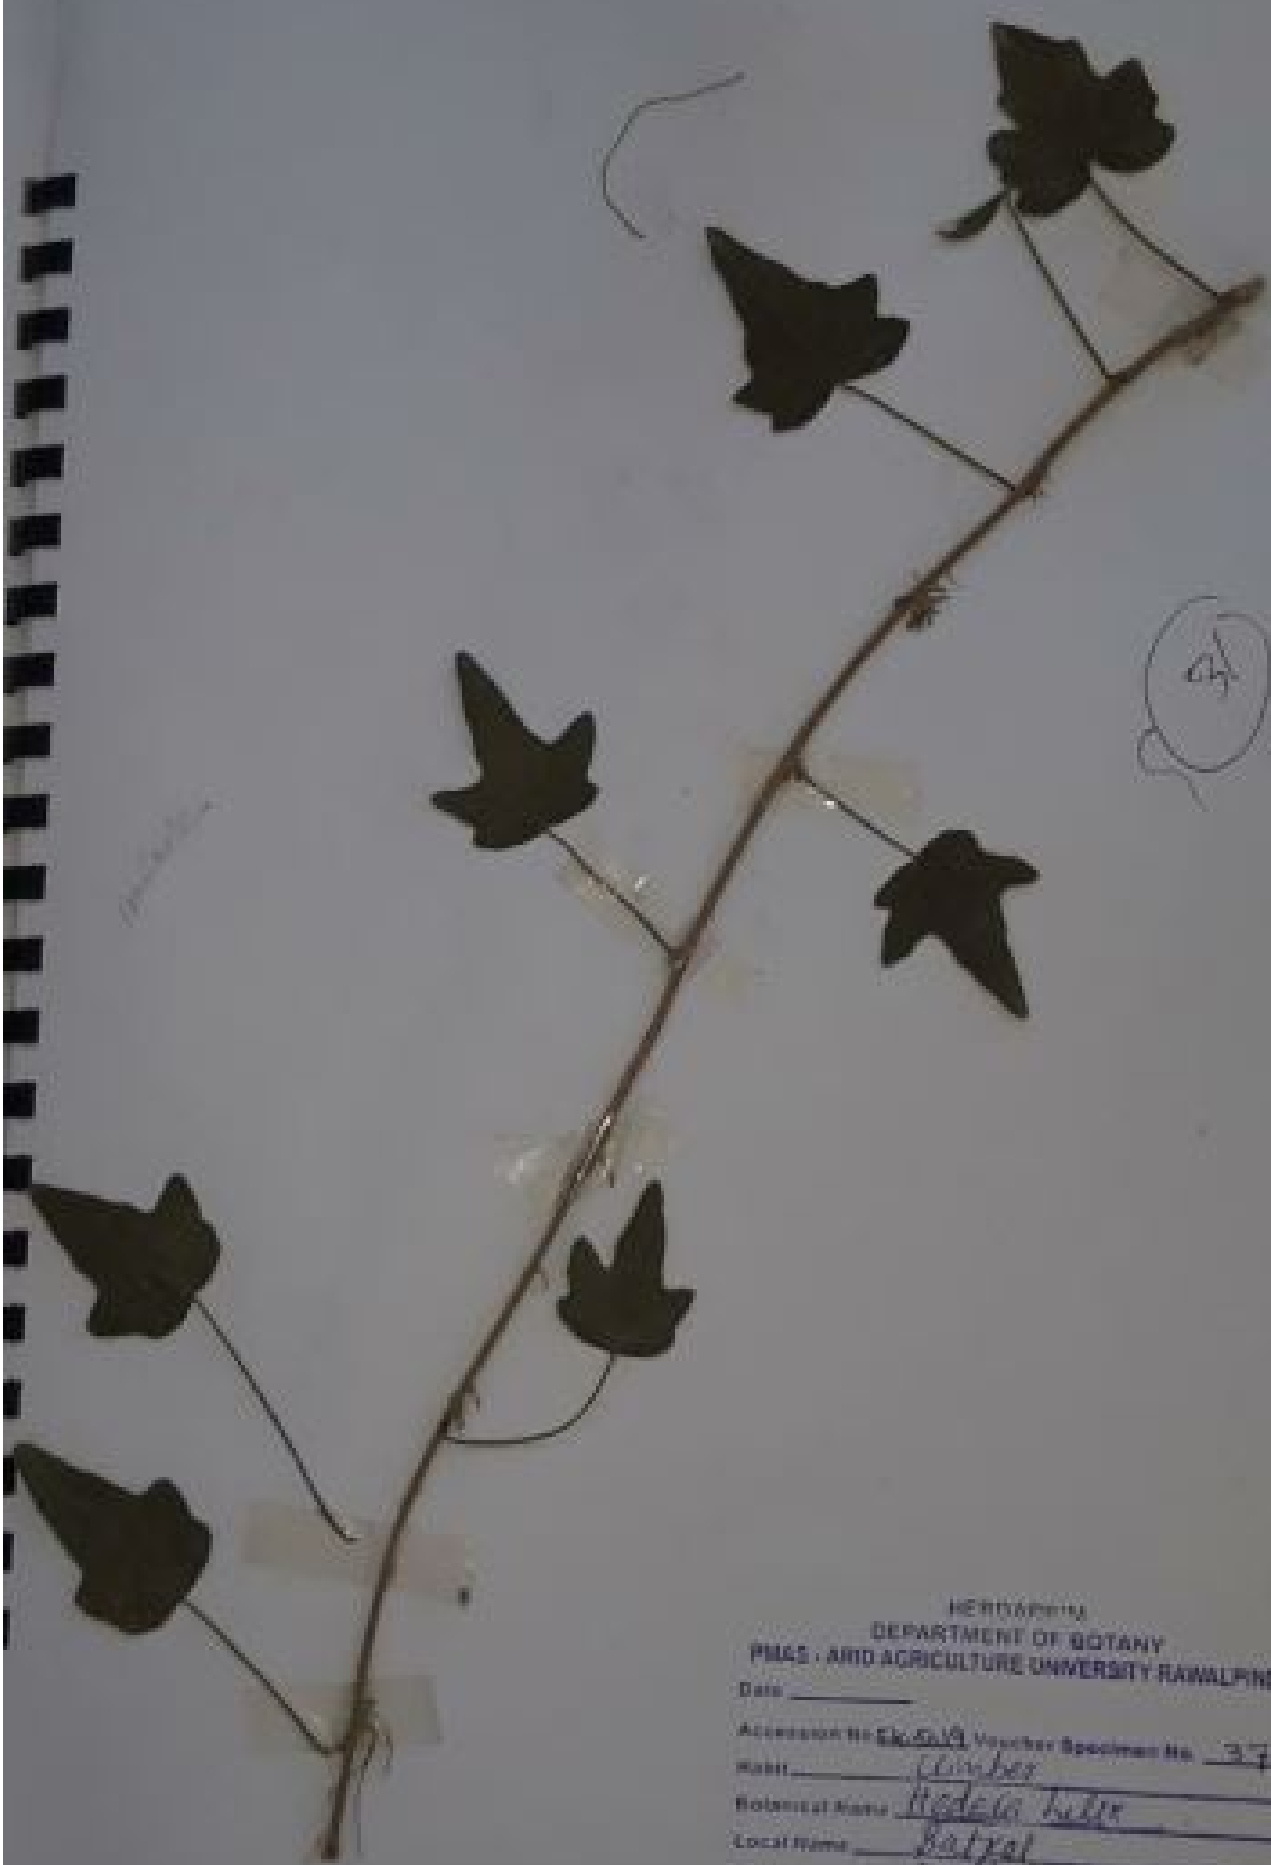

HERBARIUM  
DEPARTMENT OF BOTANY  
PMAS, ANIL AGRICULTURE UNIVERSITY RAWALPINDI

Date \_\_\_\_\_  
Accession No. 519 Voucher Specimen No. 37  
Host Limber  
Botanical Name Medeia lutea  
Local Name Batyal  
Family Biaknaceae  
Locality Ganula (Shdby)  
Date of Collection \_\_\_\_\_  
Collected By Farooq  
Identified By Dr. Rahmat



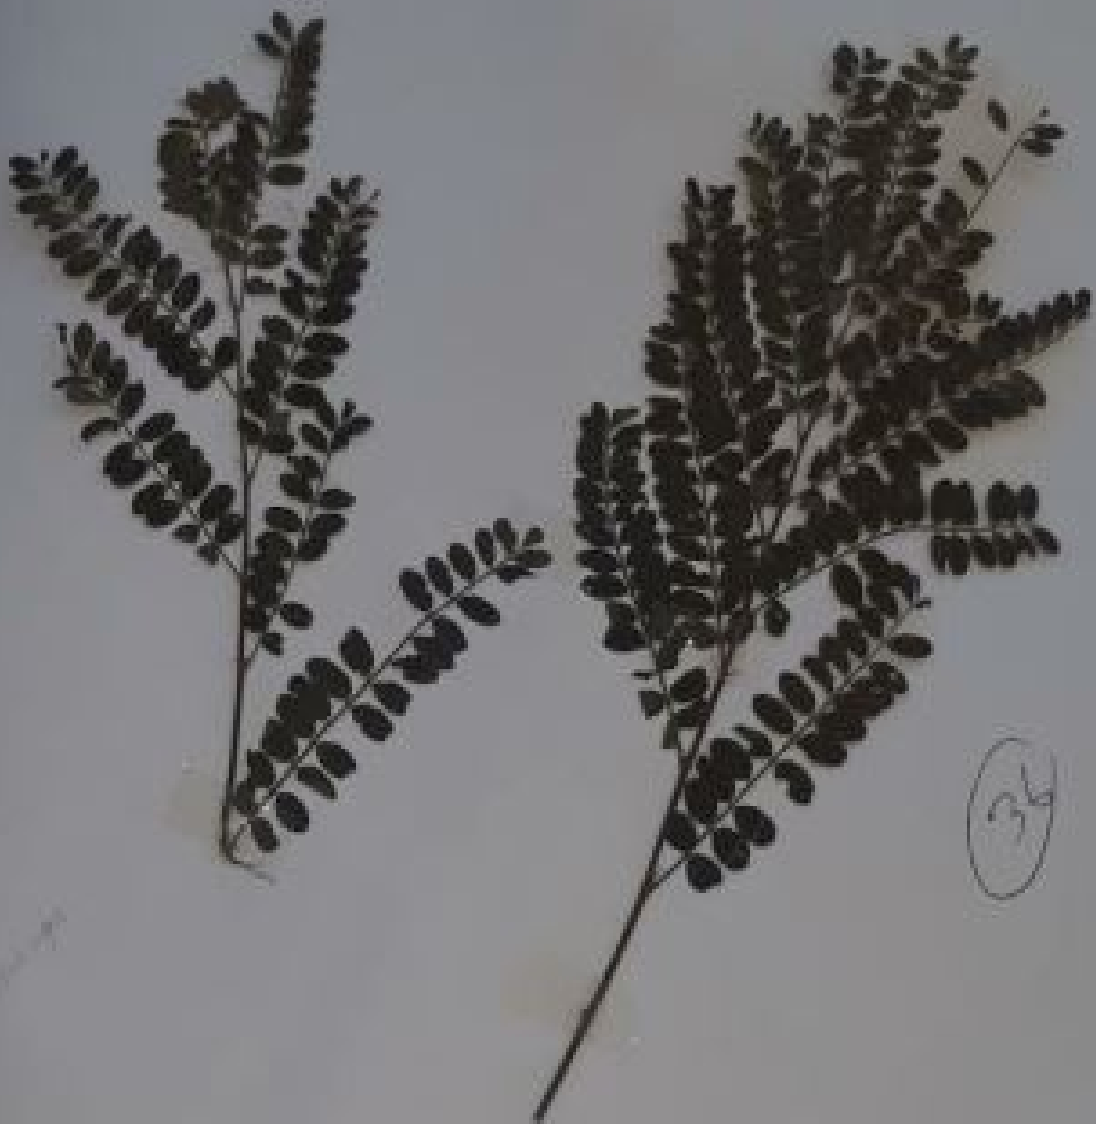

38

HERBARIUM  
DEPARTMENT OF BOTANY  
PMAS - ARID AGRICULTURE UNIVERSITY RAWALPINDI

Date \_\_\_\_\_  
Accession No. 38 Specimen No. 38  
Habit Shrub  
Botanical Name Indigofera heterantha  
Local Name Mangi Tandi  
Family Leguminosae  
Locality Kahala (Shahi)  
Date of Collection \_\_\_\_\_  
Collected By Farooq  
Identified By Dr. Rahim

adha toda  
Acanthaceae

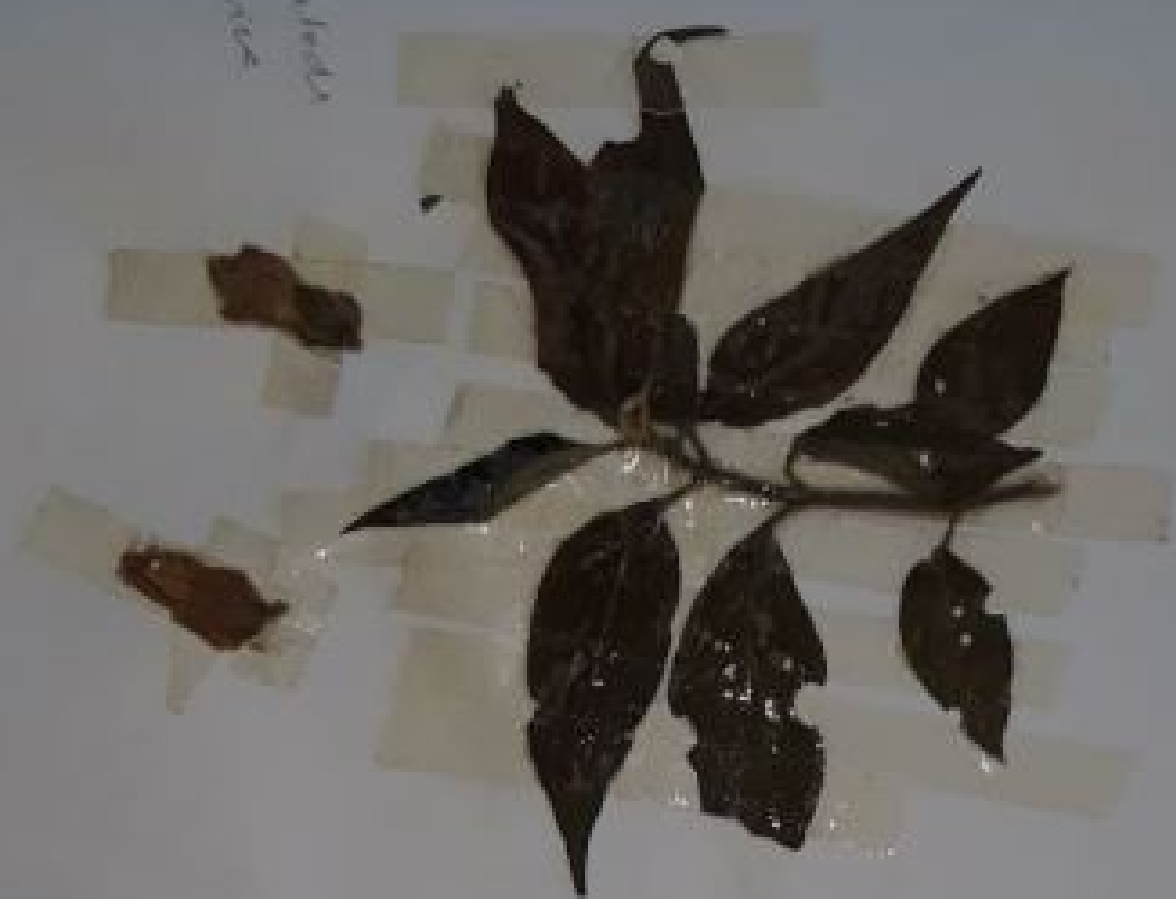

Acanthaceae

adha toda

No. 1071 Date 10/10/2011  
 Locality Forest  
 Collector Prashant  
 Local Name Adha toda  
 Family Acanthaceae  
 Part of Collection Herb  
 No. of Sheets 1

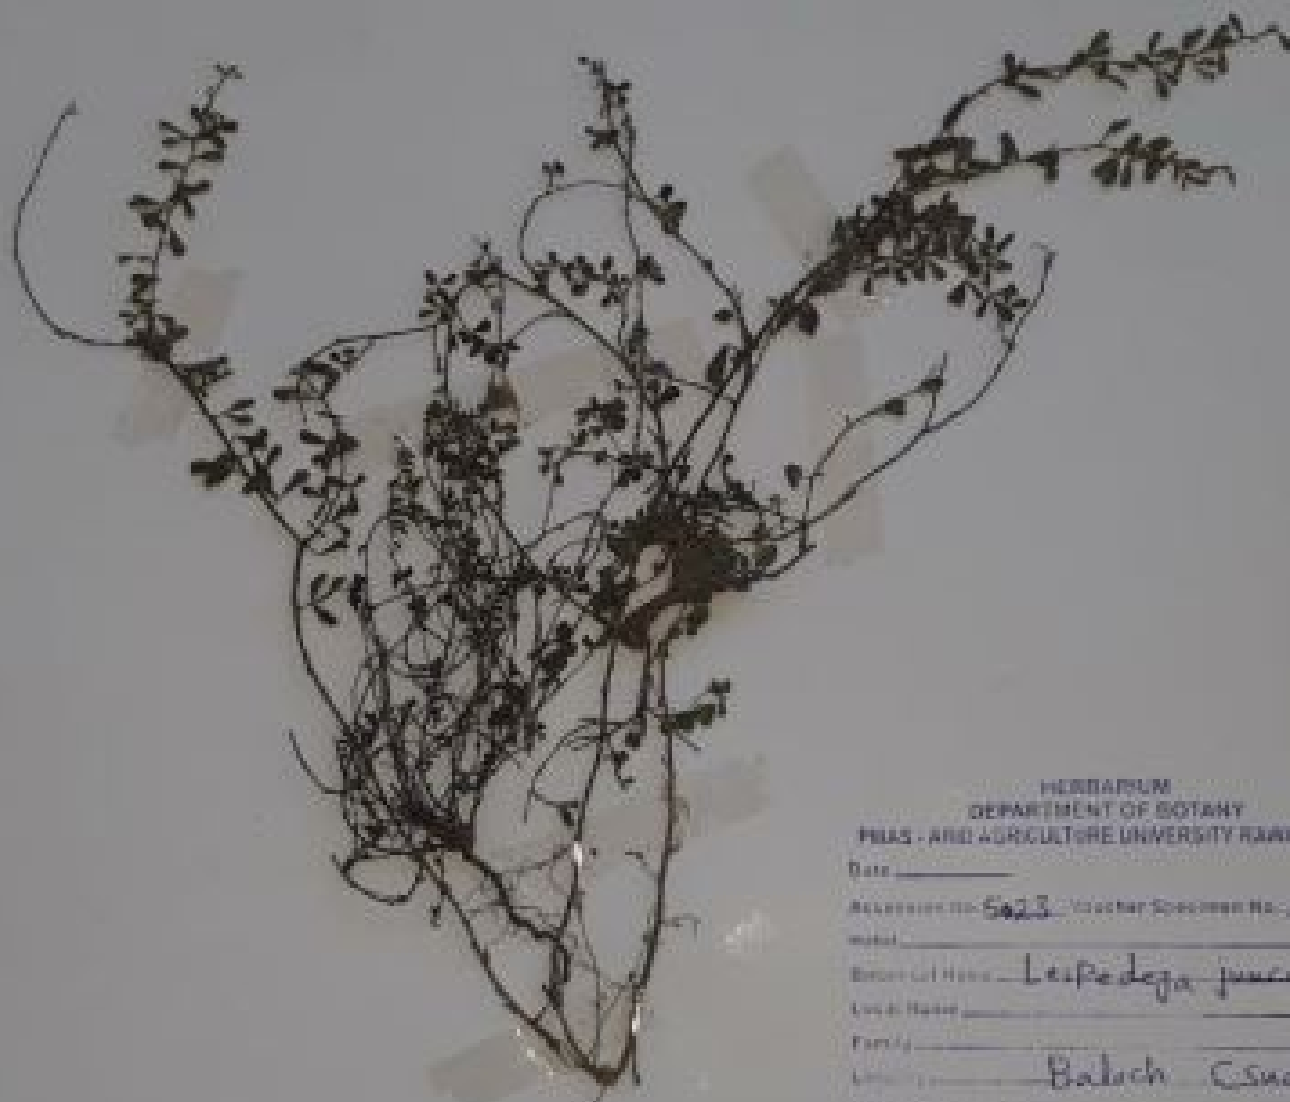

HERBARIUM  
DEPARTMENT OF BOTANY  
PMAS - ARI AND AGRICULTURE UNIVERSITY RAWALPINDI

Date \_\_\_\_\_  
Accession No. 5023 Voucher No. 162  
No. \_\_\_\_\_  
Botanical Name Leptodermis juncea  
Local Name \_\_\_\_\_  
Family \_\_\_\_\_  
Locality Baluch, Sindh  
Date of Collection \_\_\_\_\_  
Collector Fazal  
Sponsor Dr. Syed

*Leptodermis juncea*

*Leptodermis juncea*

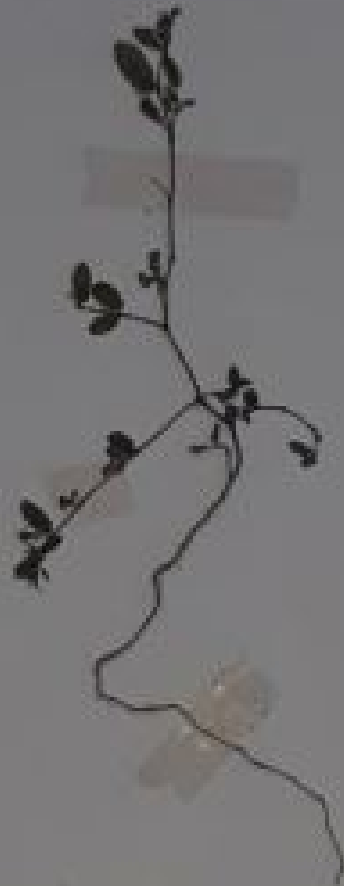

HERBARIUM  
DEPARTMENT OF BOTANY  
PMAS - ARID AGRICULTURE UNIVERSITY RAWALPINDI

Date \_\_\_\_\_

Accession No. 42

Label \_\_\_\_\_

Botanical Name Lotus corniculatus

Local Name \_\_\_\_\_

Family \_\_\_\_\_

Locality Numb (Sindh)

Date of \_\_\_\_\_

Collector Fering

Identified by Dr Sajjad

*Lotus corniculatus*

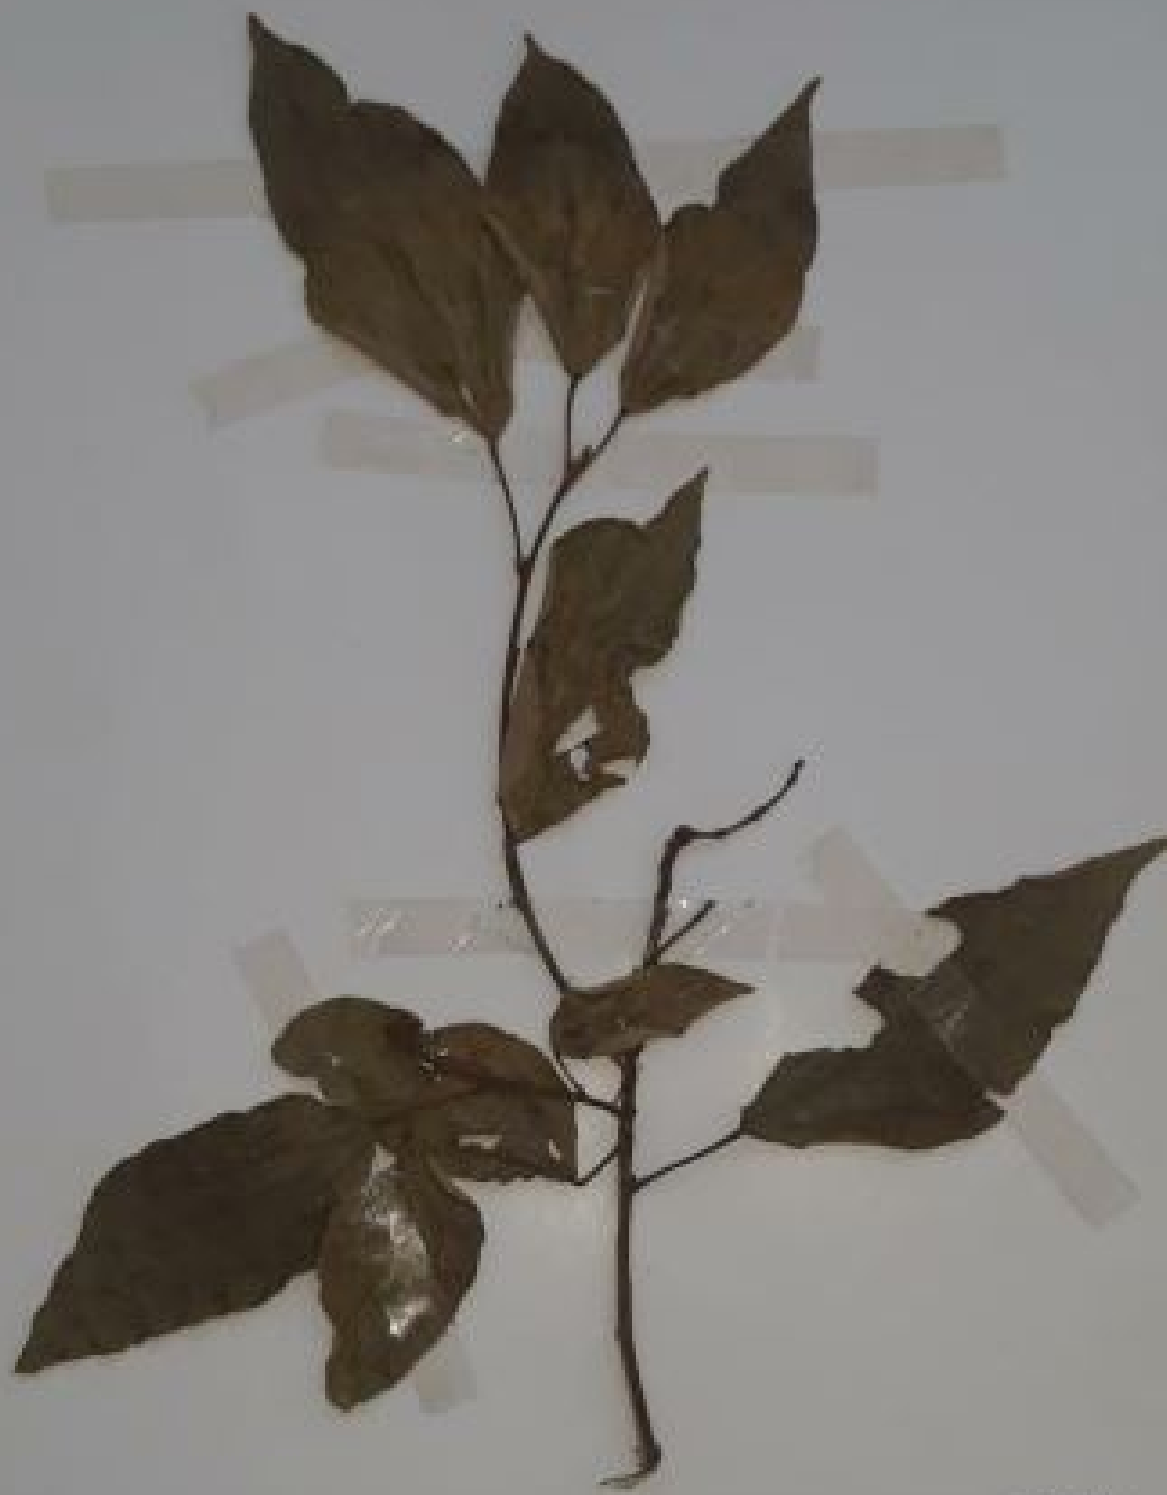

PMAS - ARI  
Date \_\_\_\_\_  
Accession No. FX-5029  
Herbarium Melaleuca  
Locality Isabrin Para  
Collector Fazog  
Dr. Romat

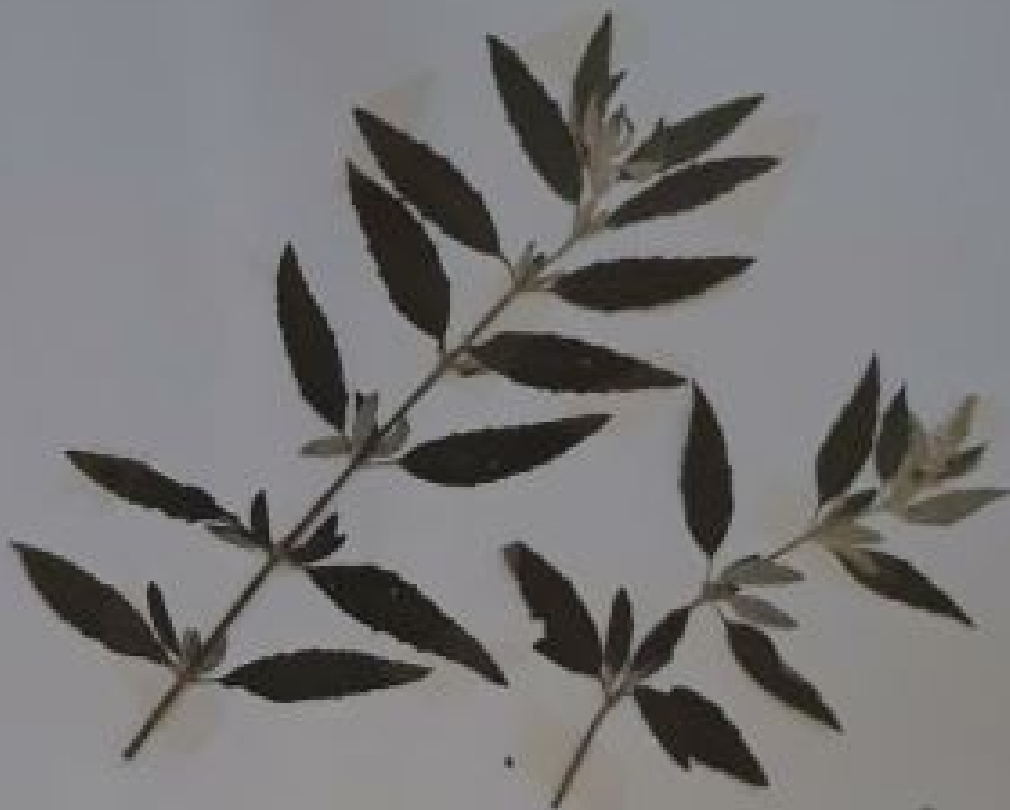

(52)

*Mentha longifolia*

HERBARIUM  
DEPARTMENT OF BOTANY  
PMAS - ARID AGRICULTURE UNIVERSITY RAVALPINDI

Date \_\_\_\_\_  
Accession No. 45031 Voucher Specimen No. 47  
Habit Shrub  
Botanical Name Mentha longifolia L.  
Local Name Challa Baramulla  
Family Lamiaceae  
Locality Bairwan (Sudh)  
Date of Collection \_\_\_\_\_  
Collected By Farooq  
Identified By Dr. Rehmat

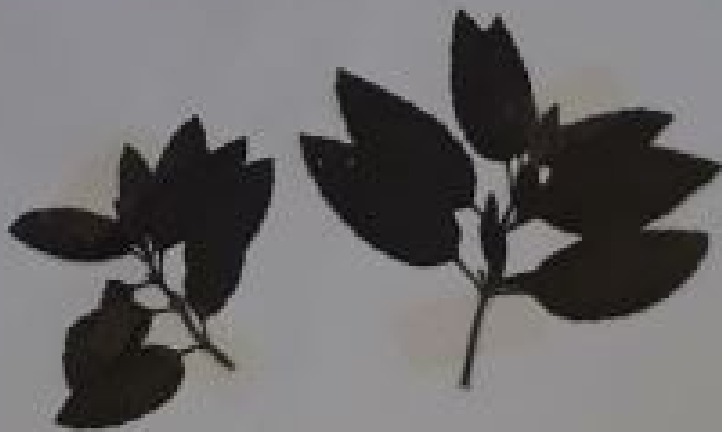

Kala  
Roodana

HERBARIUM  
DEPARTMENT OF BOTANY  
PMAS - ARID AGRICULTURE UNIVERSITY RAWALPINDI

Date \_\_\_\_\_  
Accession No. 5032 Voucher Specimen No. 48  
Habit Herb  
Botanical Name Mentha arvensis L.  
Local Name Kala Roodana  
Family Lamiaceae  
Locality Baitan  
Date of Collection \_\_\_\_\_  
Collected By Farooq  
Identified By Dr. Rizmat

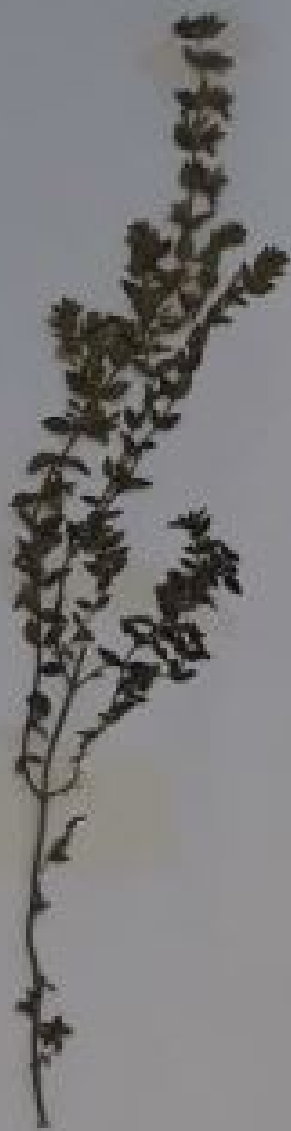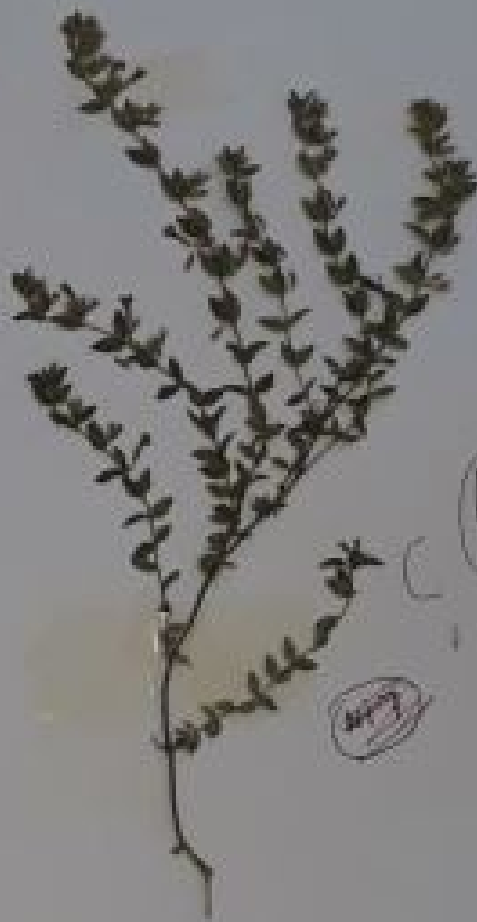

(No)

(51)

(5)

*Mucuna biflora*

HERBARIUM  
DEPARTMENT OF BOTANY  
PAAS - ARS AGRICULTURE UNIVERSITY RAWALPINDI

Date \_\_\_\_\_  
Accession No. FCO/1 Voucher Specimen No. 51  
Rabit \_\_\_\_\_  
Botanical Name *Mucuna mucronata* Willd.  
Local Name Sandi  
Family \_\_\_\_\_  
Locality Cheshm (Swath)  
Date of Collection \_\_\_\_\_  
Collected By Prof.  
Identified By Dr. Rehman





(46)

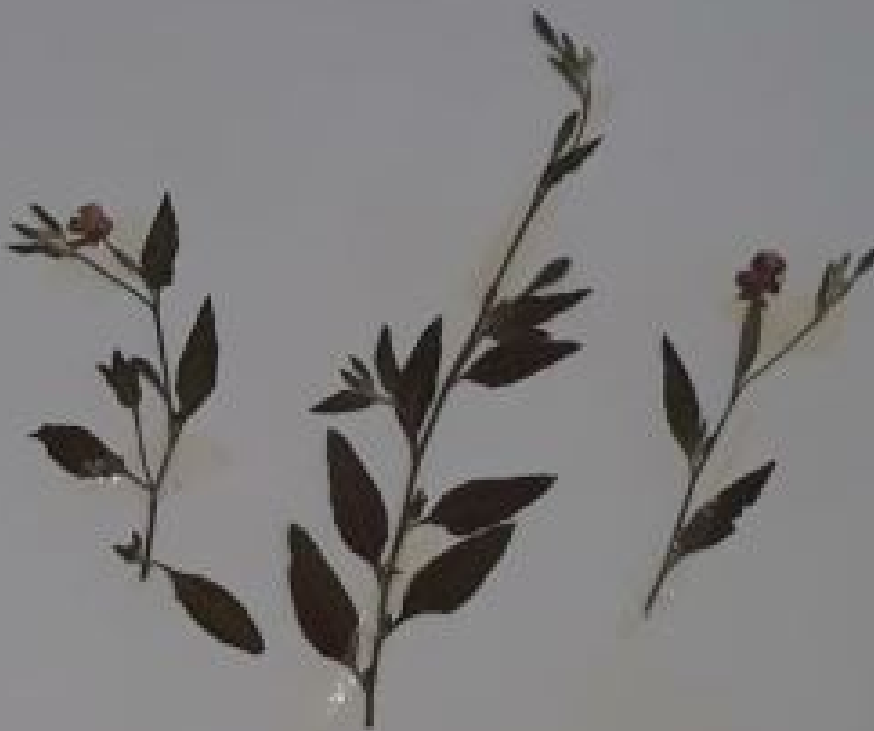

HERBARIUM  
DEPARTMENT OF BOTANY  
PMS - AND AGRICULTURE UNIVERSITY RAWALPINDA

Date \_\_\_\_\_  
Accession No. 537 Voucher Specimen No. 55  
Name Herb.  
Botanical Name Zenopsis near U.  
Local Name Engelmasther  
Family Cruciferae  
Locality Dist. Gali  
Date of Collection \_\_\_\_\_  
Collected By Fang  
Revised By Dr. Rahmat

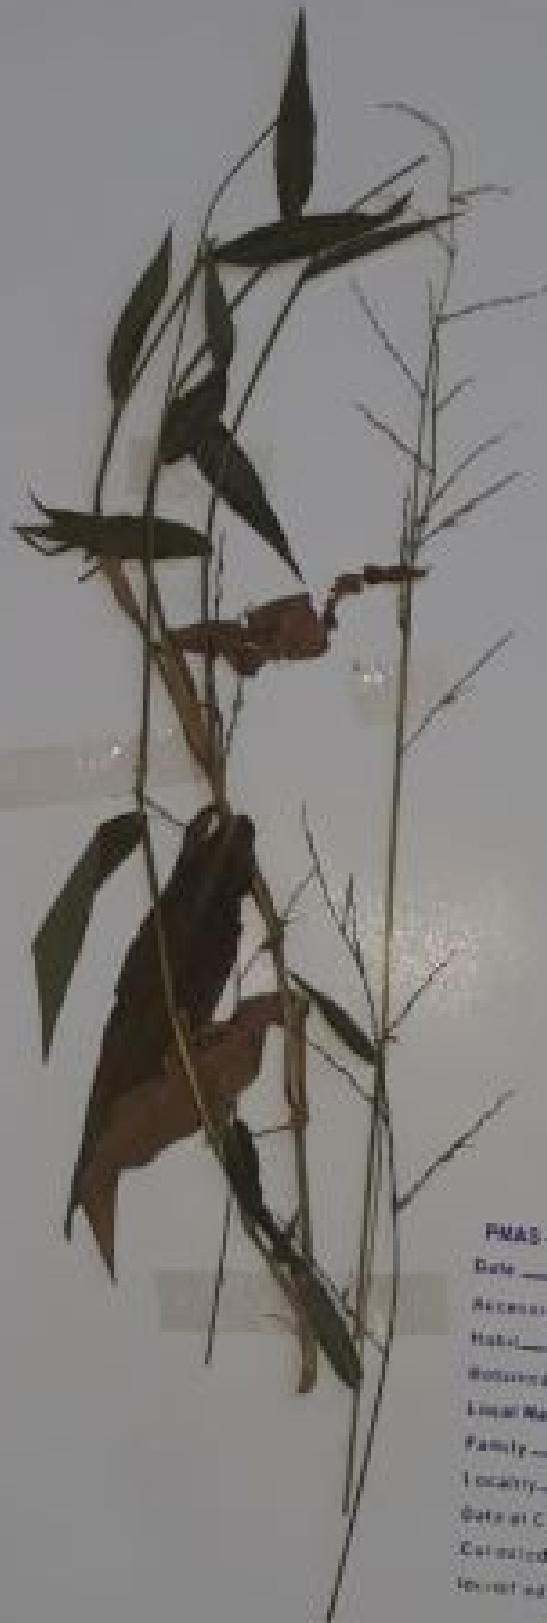

HERBARIUM  
DEPARTMENT OF BOTANY  
PMAS - ARID AGRICULTURE UNIVERSITY RAWALPINDI

Date \_\_\_\_\_

Accession No. 57 Voucher Specimen No. 57

Habit \_\_\_\_\_

Botanical Name *Oplismenus compositus*

Local Name \_\_\_\_\_

Family P

Locality Nakhar Gurdiala

Date of Collection \_\_\_\_\_

Collected By Fazal

Identified By Dr. Sajid

*Oplismenus*  
*Compositus*

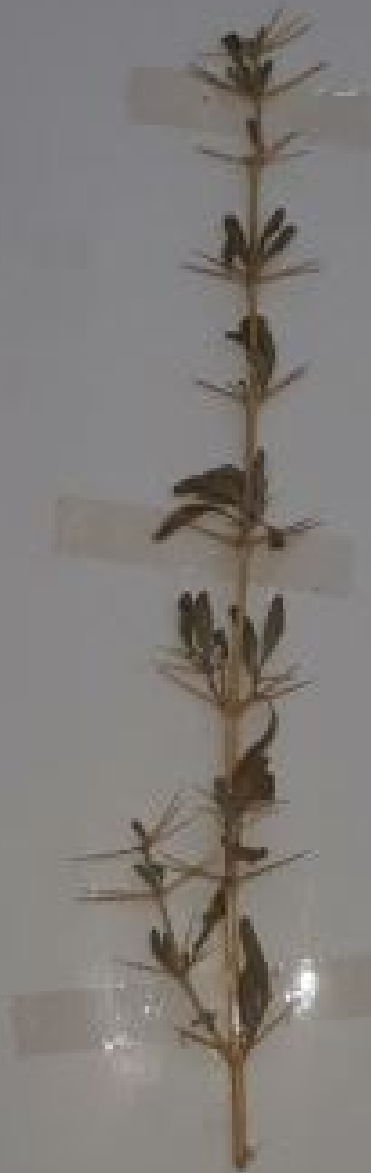

HERBARIUM  
DEPARTMENT OF BOTANY  
PAAS - ARII AGRICULTURE UNIVERSITY RAWALPINDI

Date \_\_\_\_\_

Accession No. 56 Year of Specimen No. 56

Name \_\_\_\_\_

Scientific Name Stostegia limbata

Local Name \_\_\_\_\_

Family \_\_\_\_\_

Loc. Amthal Cswahy

Col. Faryaf

Collector Dr. Sujjad

*Stostegia limbata*

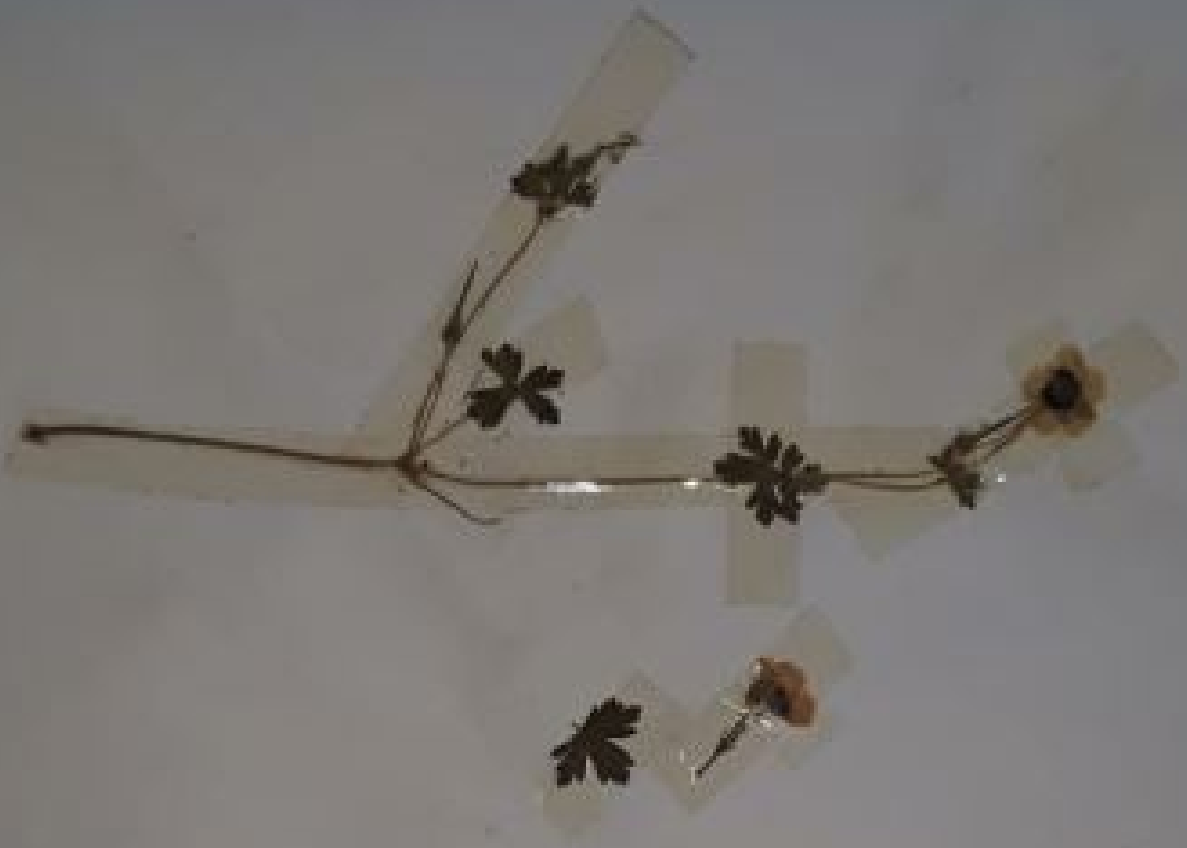

Geraniaceae

*Geranium* *occidentale*

HERBARIUM  
MUSEUM OF PLANT CULTURE  
RANALPINDI  
Accession No. 1000 Voucher Specimen No. 100  
Botanical Name *Geranium*  
Local Name \_\_\_\_\_  
Family \_\_\_\_\_  
Locality Sorsan (Swat)  
Date of Collection \_\_\_\_\_  
Collected By Emil  
Determined By P. Ahmad

~~Lythraceae~~  
~~Lythraceae~~

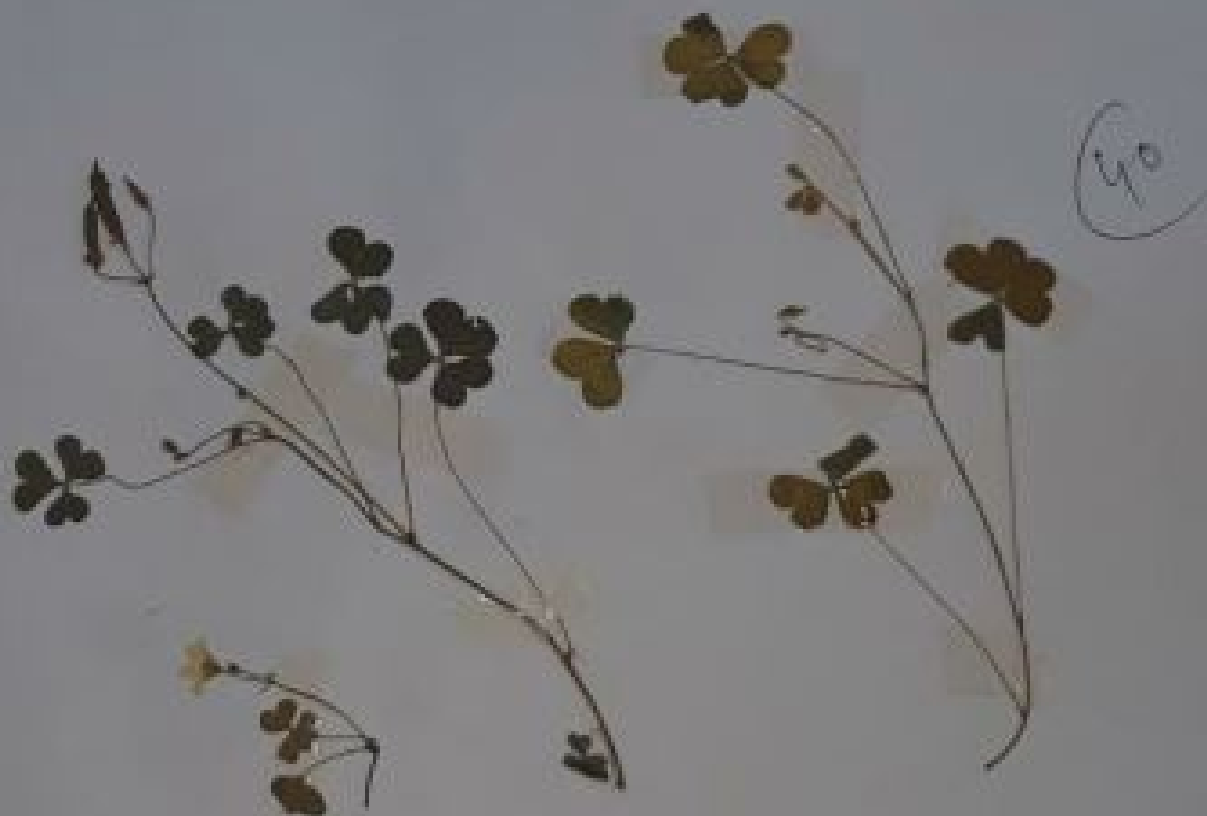

HERBARIUM  
DEPARTMENT OF BOTANY  
PMAS - ARID AGRICULTURE UNIVERSITY RAHWALPURI

Date \_\_\_\_\_

Accession No. PK 502 Voucher Specimen No. 58

Material Herb

Botanical Name Oxalis corniculata (L.)

Local Name Kathala / Kathala / Kathala / Kathala / Kathala

Family Oxalidaceae

Locality Seri / Sindhar

Date of Collection \_\_\_\_\_

Collected By Farooq

Identified By Dr. Rizwan

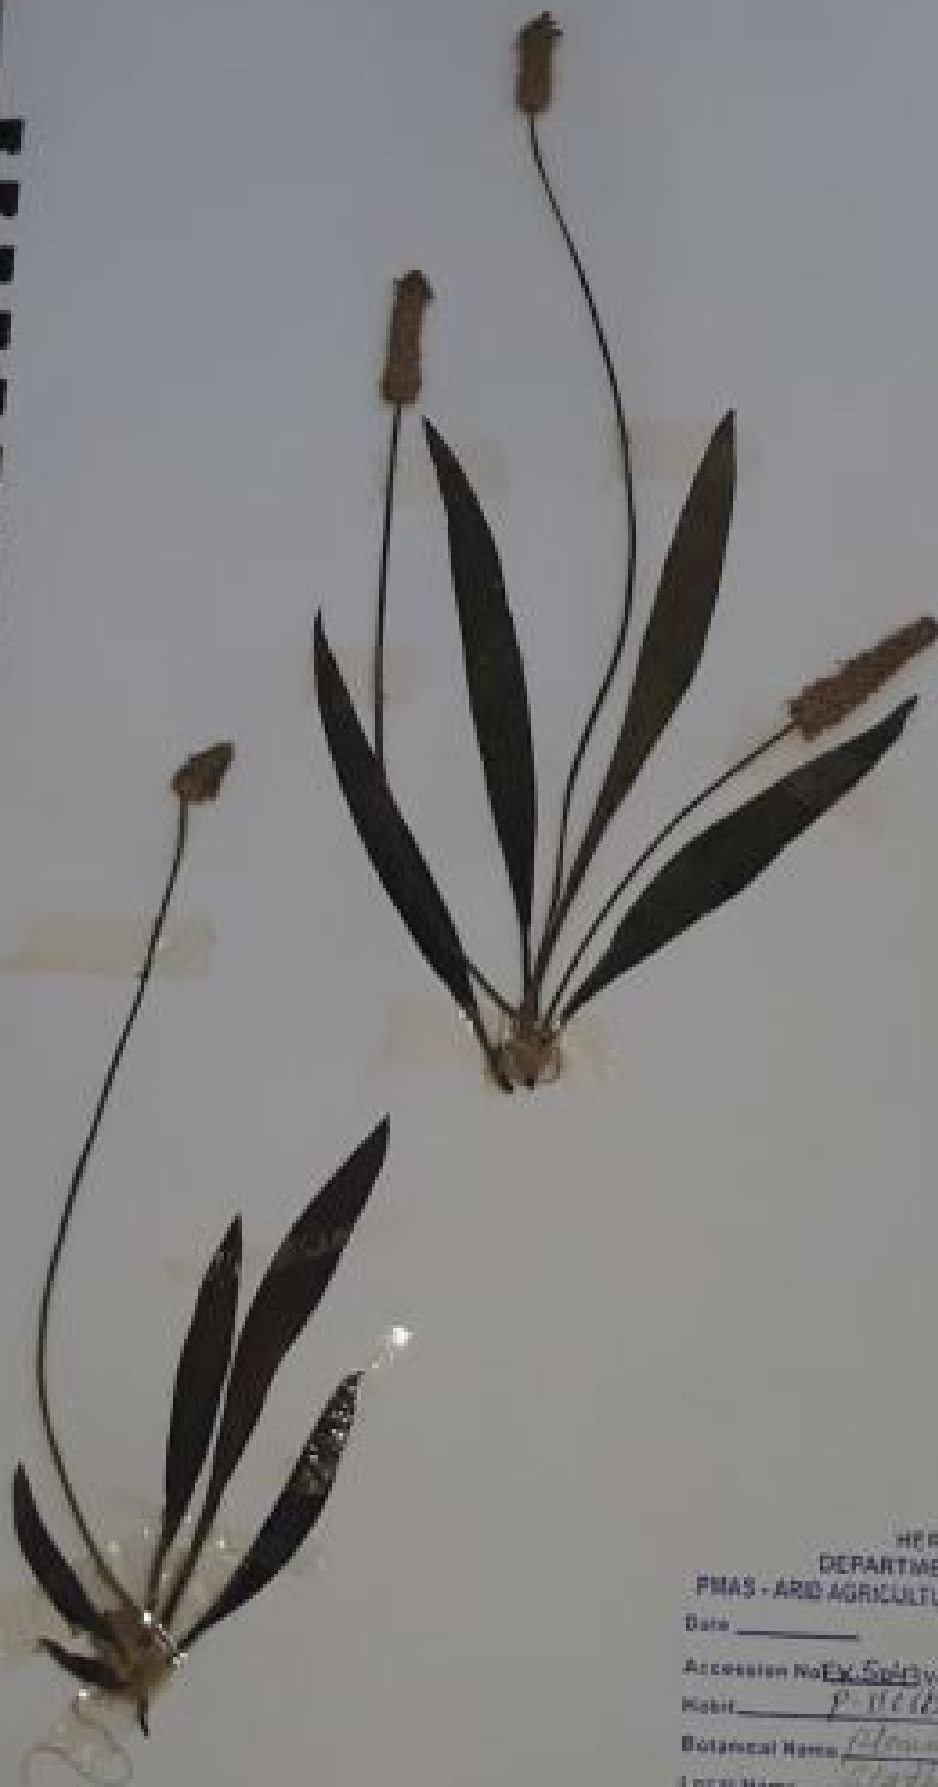

59

HERBARIUM  
DEPARTMENT OF BOTANY  
PMAS - ARID AGRICULTURE UNIVERSITY RAWALPINDI

Date \_\_\_\_\_  
Accession No. 59 Voucher Specimen No. 59  
Herb. P. 1110  
Botanical Name Platysa linearis  
Local Name Stathel  
Family Platysaceae  
Locality Panthal (Sudh)  
Date of Collection \_\_\_\_\_  
Collected By Fazal  
Identified By Dr. Ahmad

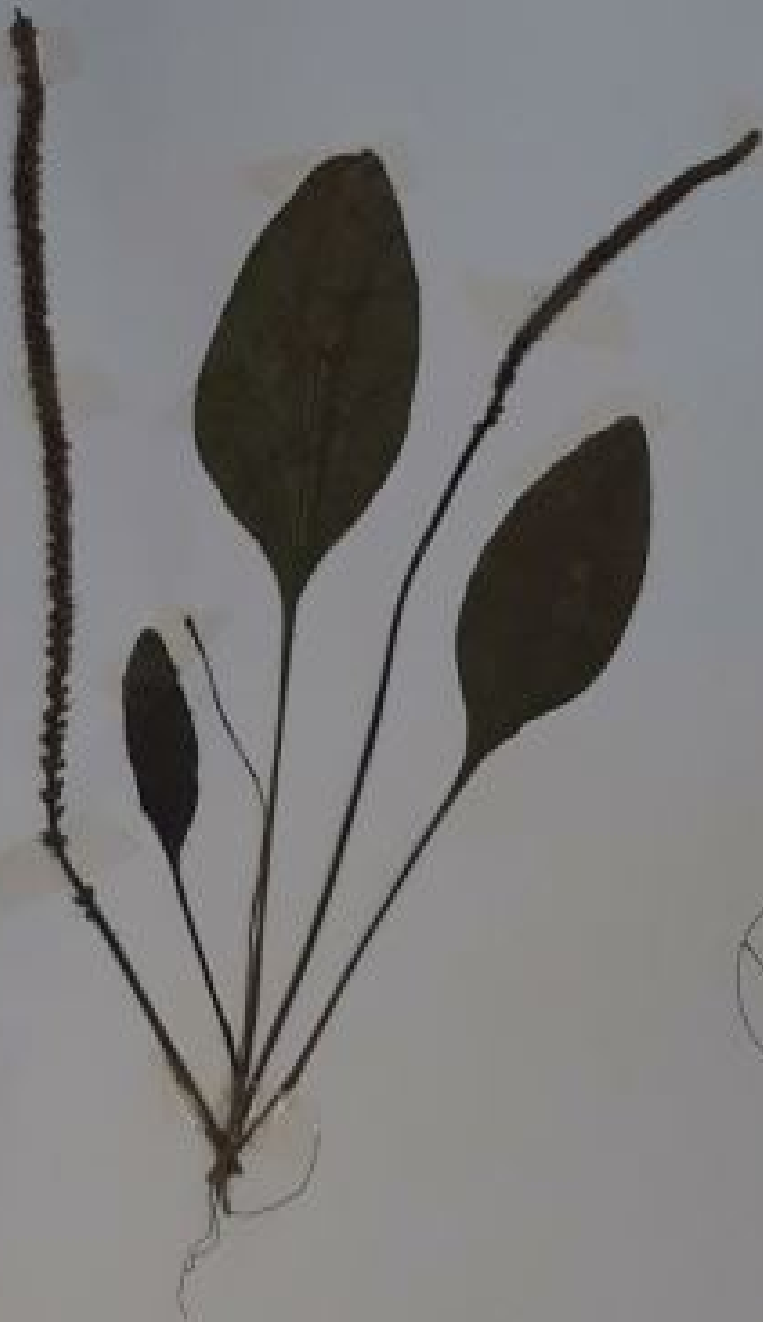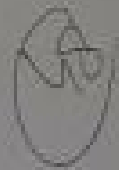

HERBARIUM  
DEPARTMENT OF BOTANY  
PAAS - ARIQ AGRICULTURE UNIVERSITY RAWALPINDI

Date \_\_\_\_\_  
Accession No. 54 / Voucher Specimen No. 60  
Host \_\_\_\_\_  
Botanical Name Plantago asiatica L.  
Local Name Salathia / Masal  
Family Plantaginaceae  
Locality Garah (Sudh)  
Date of Collection \_\_\_\_\_  
Collected By Farooq  
Identified By Dr. Rehman





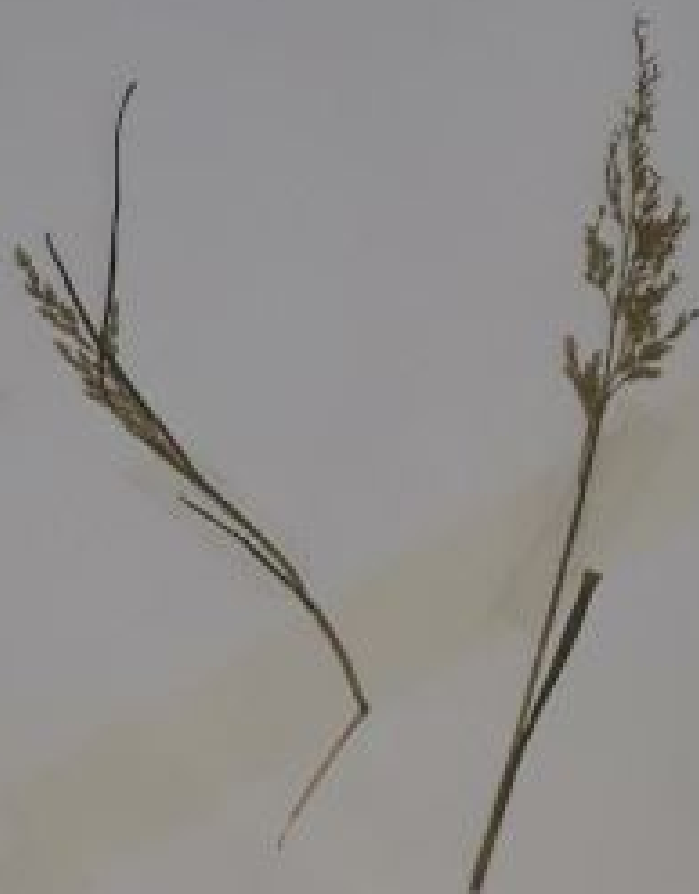

(50)

HERBARIUM  
DEPARTMENT OF BOTANY  
PMAS - ARID AGRICULTURE UNIVERSITY RAWALPINDI

Date \_\_\_\_\_

Accession No. Ex. 50/16 Voucher Specimen No. 62

Habit \_\_\_\_\_

Botanical Name DIC. ANNUA L.

Local Name 1-pan / malla

Family POACEAE

Locality Gorah (Sudh)

Date of Collection \_\_\_\_\_

Collected by Pasaf

Identified by Dr. Rana

(51)

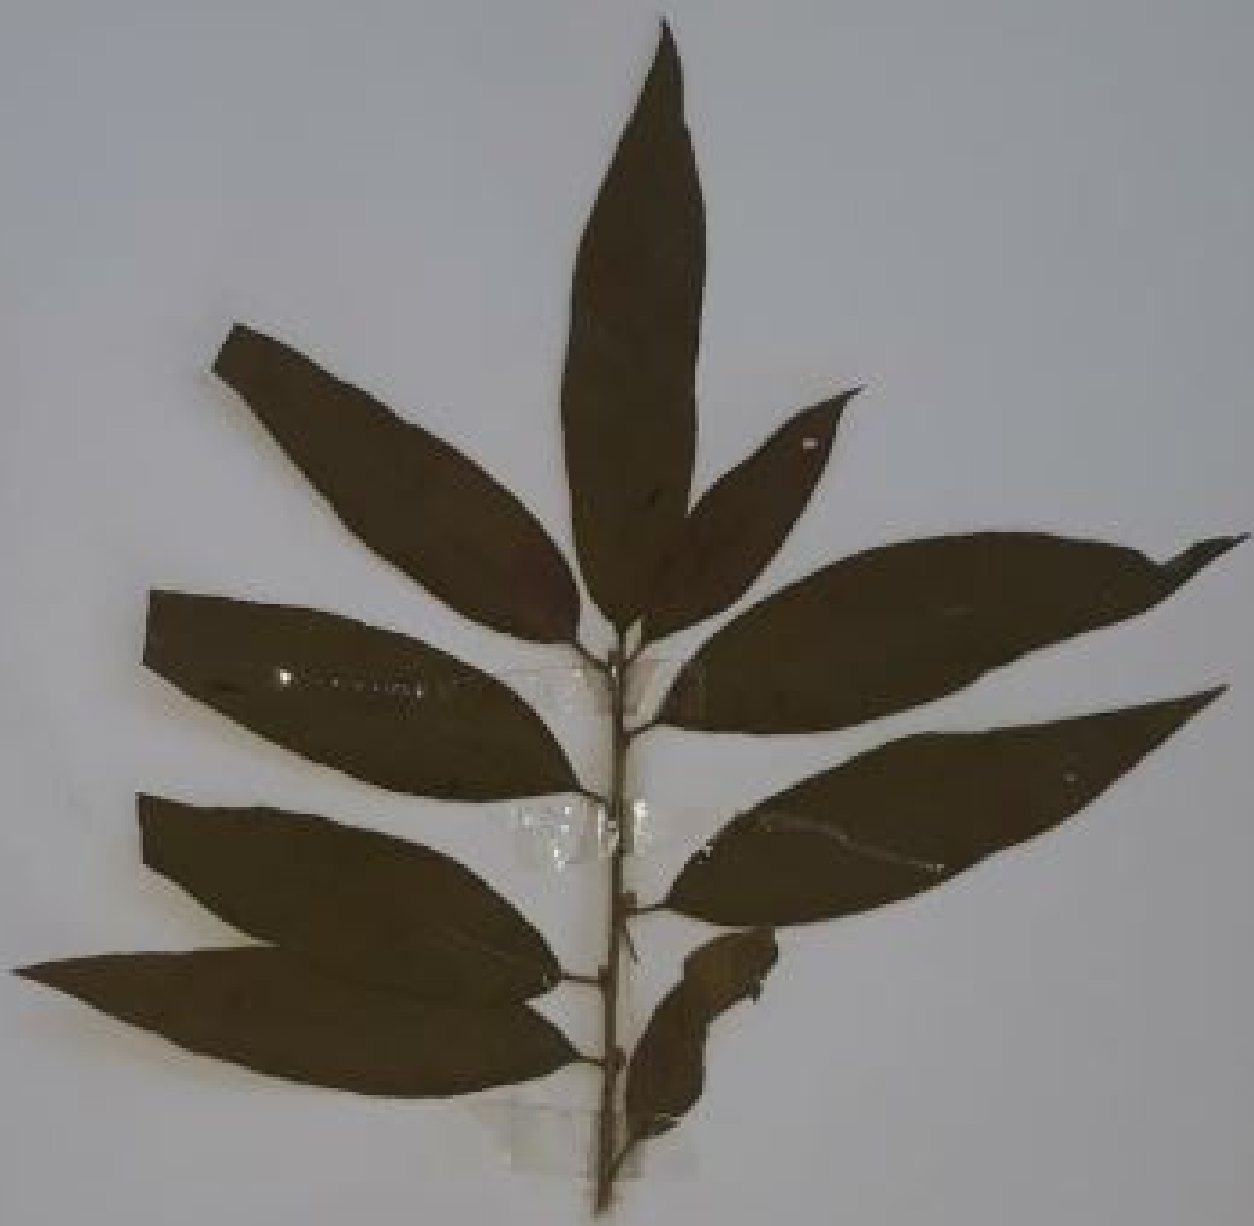

*Handwritten note:* Plum

*Handwritten note:* Plum

HERBARIUM  
DEPARTMENT OF BOTANY  
PMAS - ARD AGRICULTURE UNIVERSITY RAWALPINDI

Date \_\_\_\_\_

Accession No. 507 / Other Specimen No. 65

Habit TREE

Botanical Name Prunus domestica

Local Name Prunus

Family ROSACEAE

Locality Garak (Sudha)

Date of Collection \_\_\_\_\_

Collector(s) Fauq

Illustrated by as Pakistan

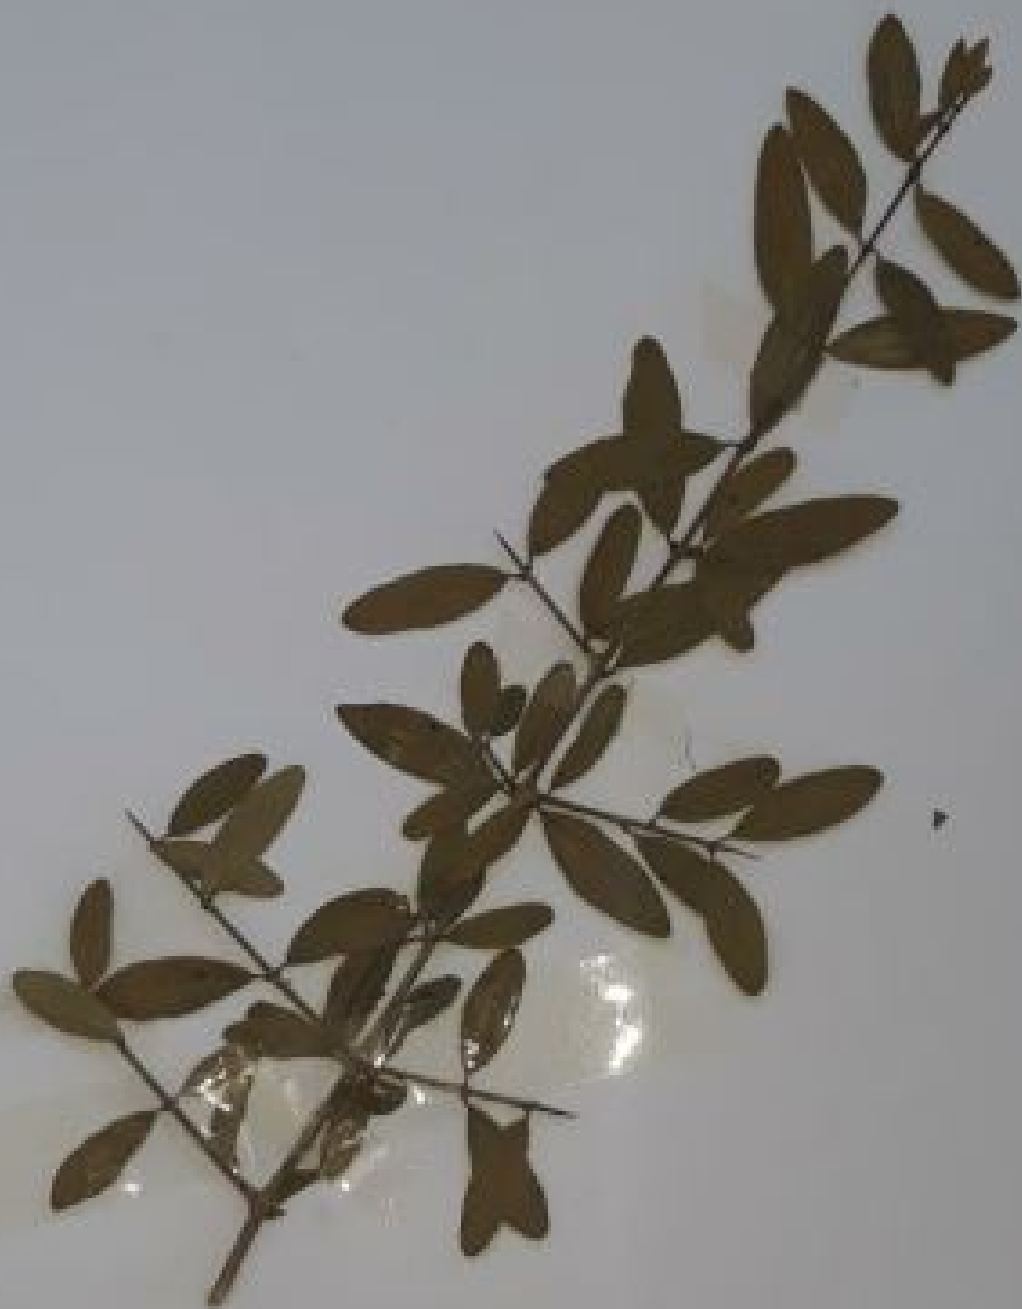

(4)

*Handwritten note:*  
Dried

HERBARIUM  
DEPARTMENT OF BOTANY  
PMAS - ARID AGRICULTURE UNIVERSITY RAWALPINDI

Date \_\_\_\_\_  
Accession No. 508 Voucher Specimen No. 64  
Host \_\_\_\_\_  
Botanical Name *Prosopis juliflora*  
Local Name دھنجد  
Family \_\_\_\_\_  
Locality Gaha Kanal (South)  
Date of Collection \_\_\_\_\_  
Collected by Fareef  
Identified by Dr. Rehman

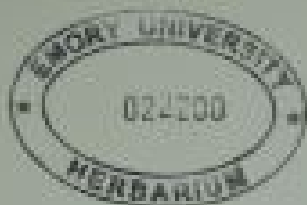

INCORPORATED INTO THE  
MEDICAL BOTANY SPECIAL COLLECTION

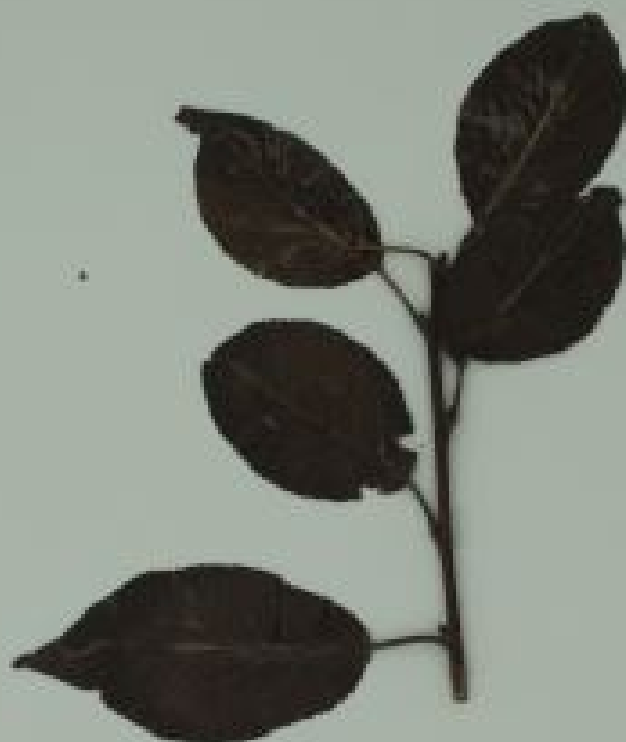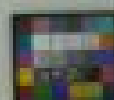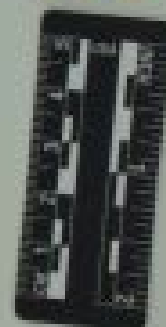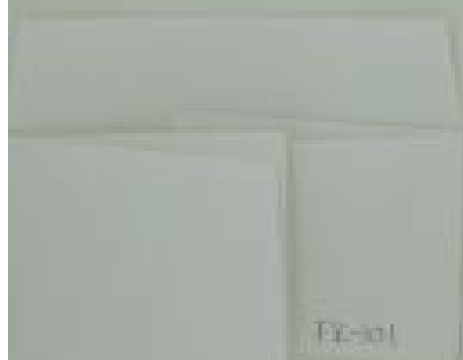

12-01

Herbarium 3011A 26-Sept-2007

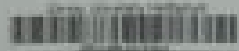

**EMORY UNIVERSITY HERBARIUM**  
FLORA OF ISLAMIC REPUBLIC OF PAKISTAN

*Pyrus pashia* (Burm. f.) DC. ex B. Don  
"wild Himalayan pear"

ROSACEAE

Orangi, Sialkot, Azad Kashmir, Islamic Republic of Pakistan

roadside

tree, flowers white, fruits edible, round in shape

fruits edible, young shoots are ground into paste and used to cure  
gout and skin infections, fruits are ground, dried used for liver  
problems, Hepatitis B local name: tangi

Muhammad Faraz Khan FK-011

11 July 2010

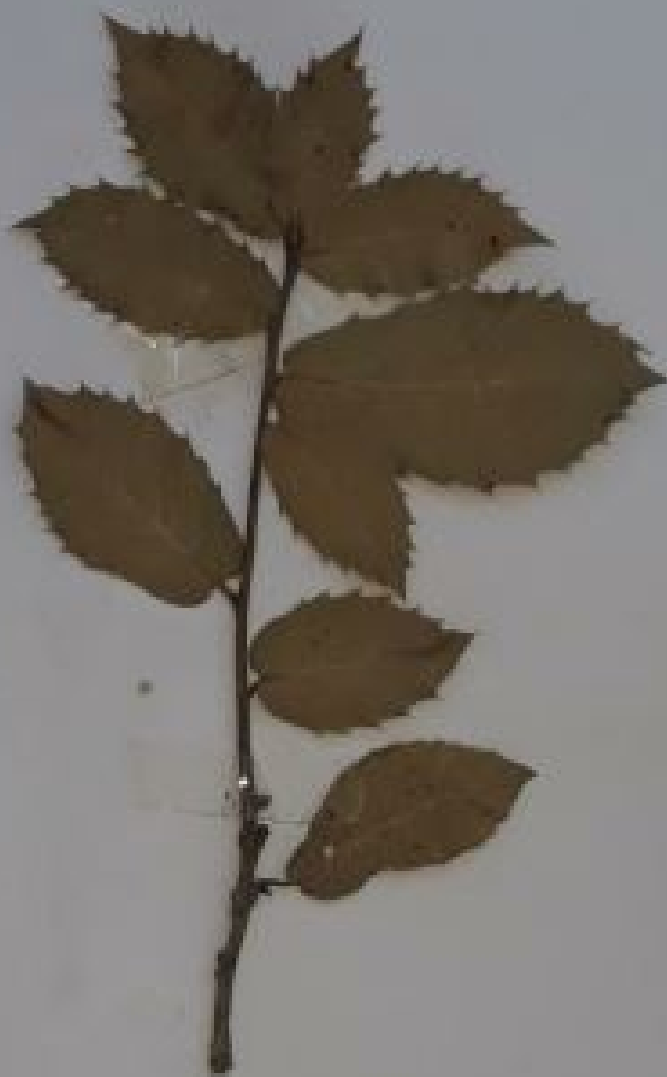

(30)

HERBARIUM  
DEPARTMENT OF BOTANY  
PMAS - ARID AGRICULTURE UNIVERSITY RAJALPIND

Date \_\_\_\_\_  
Accession No. 66 Voucher Specimen No. 66  
Habit \_\_\_\_\_  
Botanical Name Quercus laevis  
Local Name Barkhad  
Family \_\_\_\_\_  
Locality Garala (Sindh)  
Date of Collection \_\_\_\_\_  
Collected By Fazoj  
Identified By Dr. Rehmat

Specimen No. 47  
Date \_\_\_\_\_  
Name Ward  
Local Name \_\_\_\_\_  
Family Ranunculaceae Locality India

Ward  
India

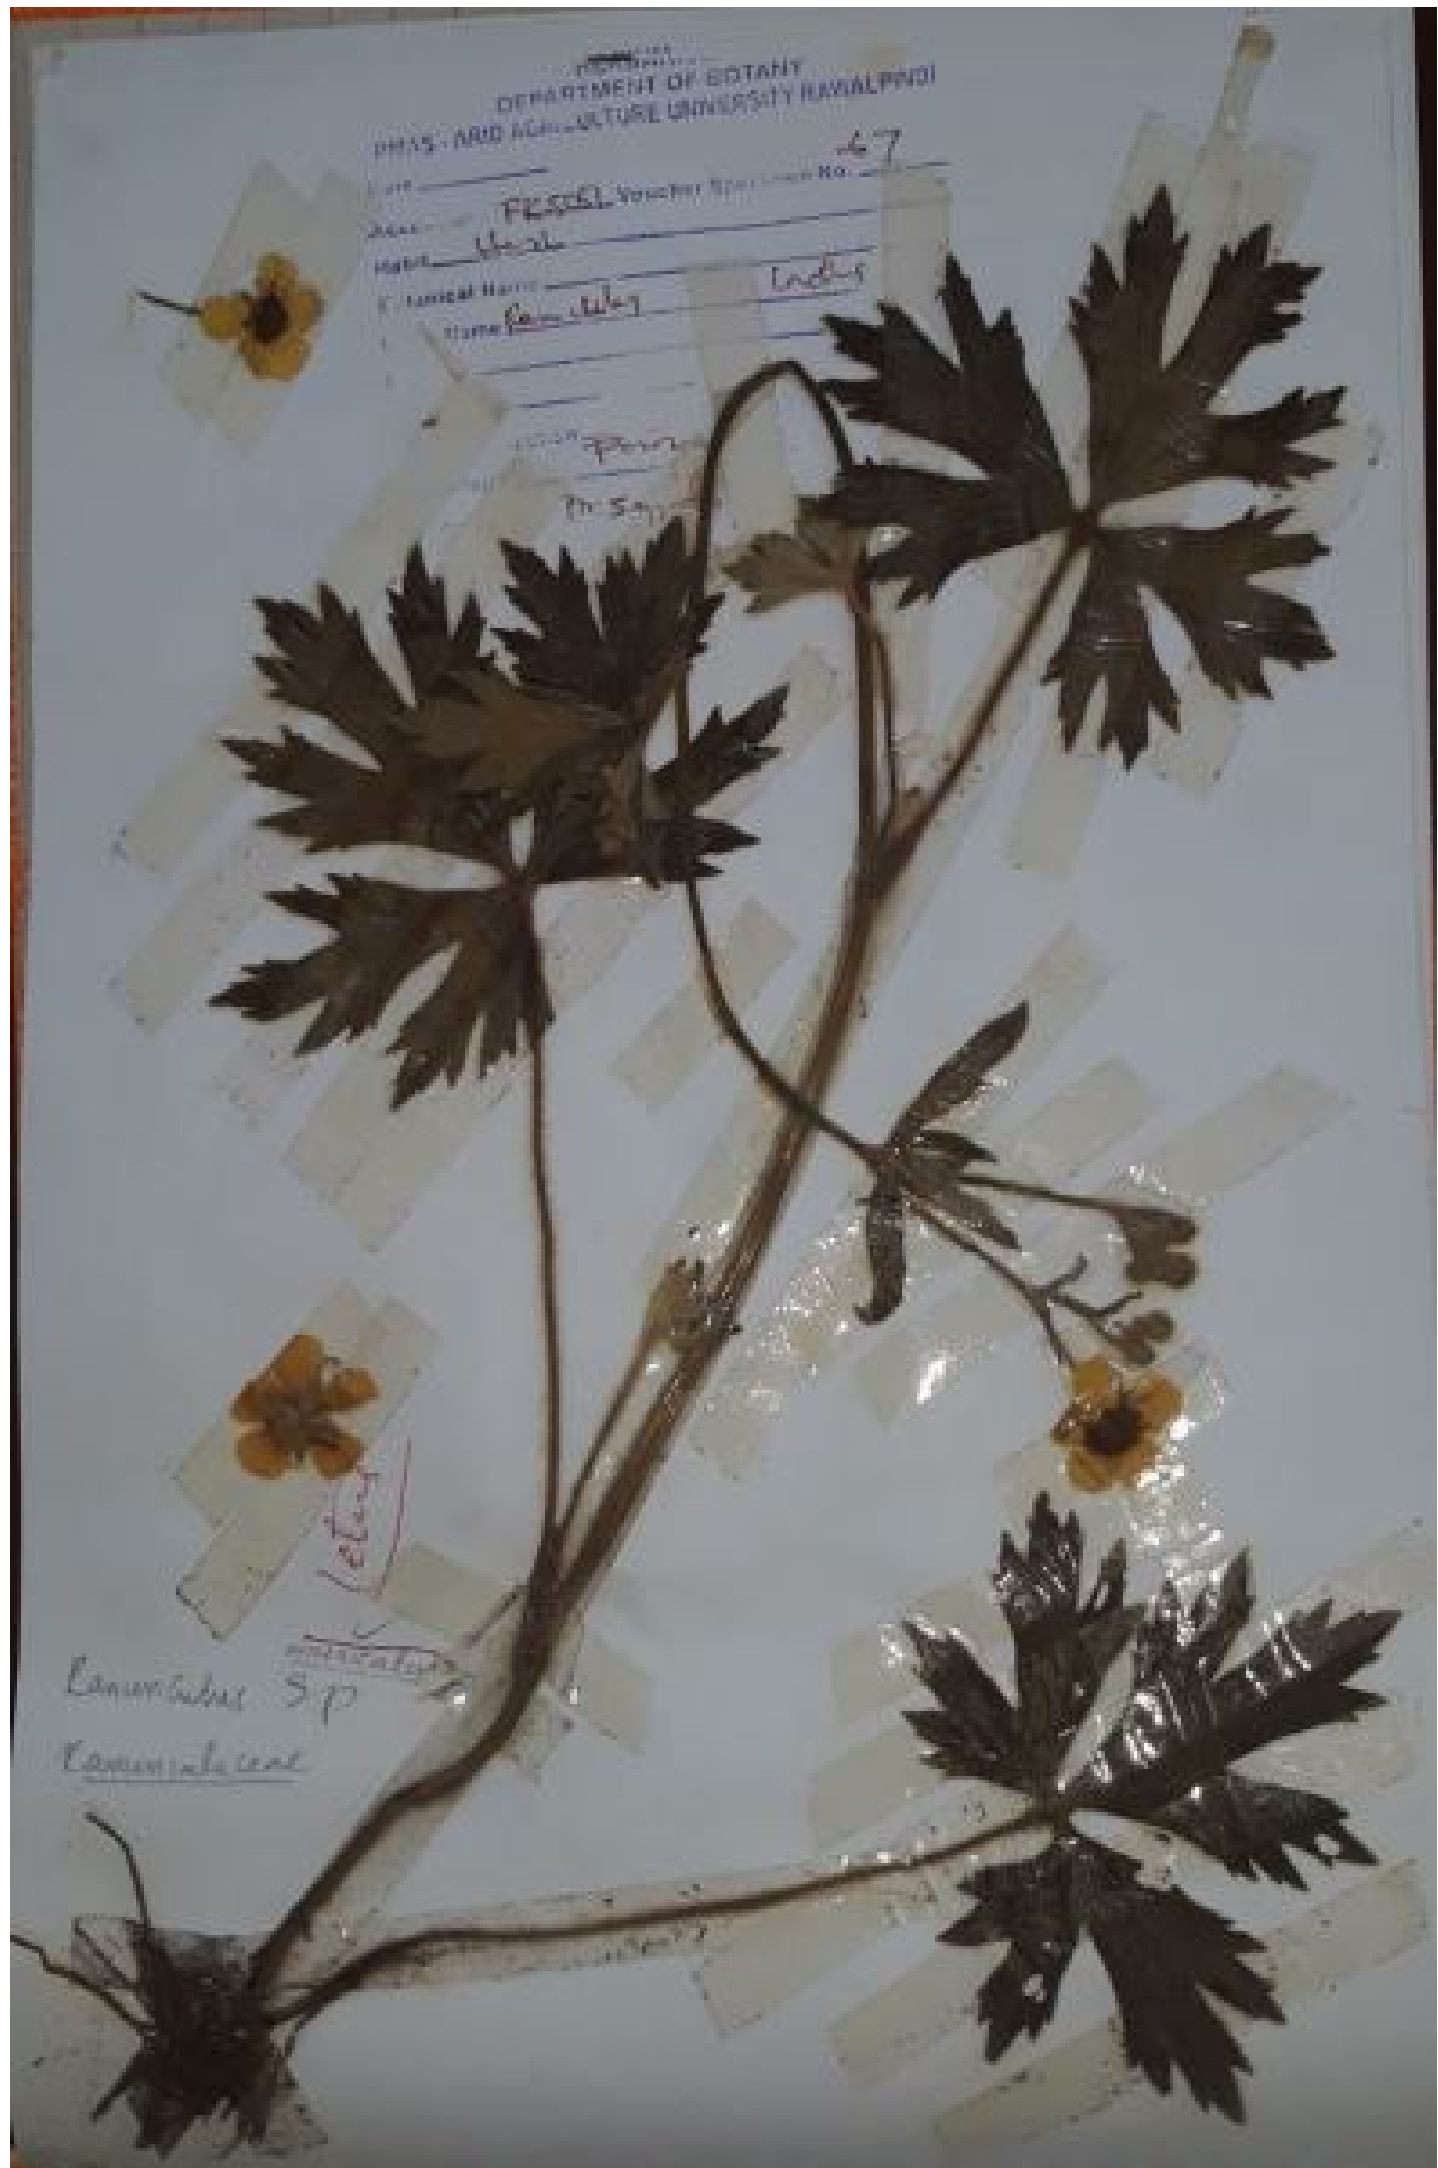

Ranunculus s.p.  
Ranunculaceae

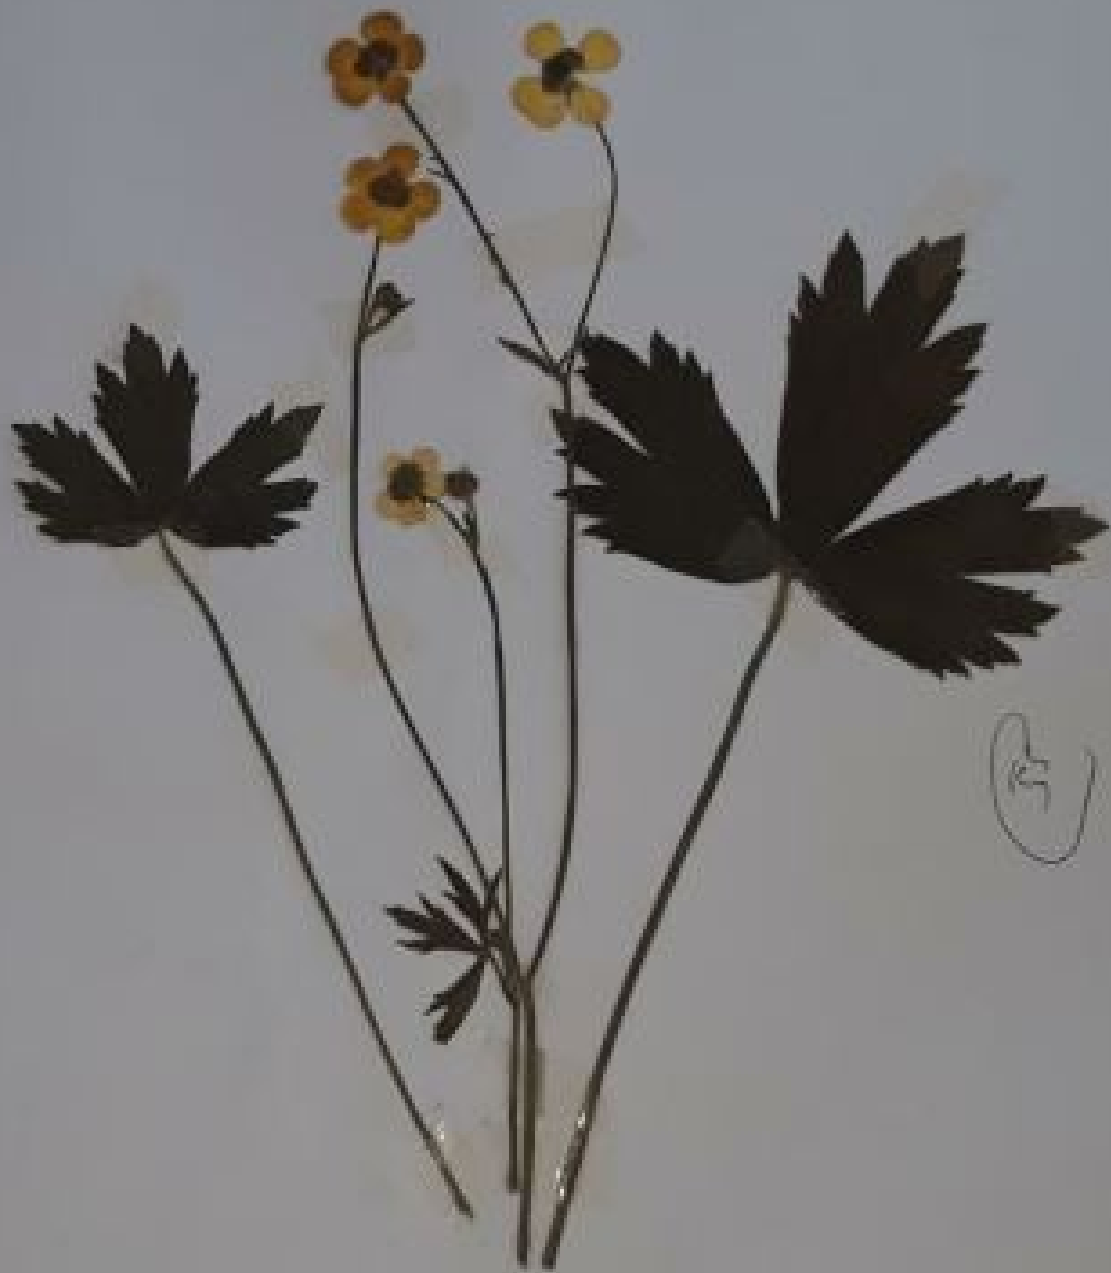

HERBARIUM  
DEPARTMENT OF BOTANY  
PMAS - ARID AGRICULTURE UNIVERSITY RAWALPINDI

Date \_\_\_\_\_  
Accession No. 5251 Voucher Specimen No. 67  
Habit Herb  
Botanical Name Ranunculus lasiocarpus  
Local Name Meloth  
Family Ranunculaceae  
Locality Pallandu (Sindh)  
Date of Collection \_\_\_\_\_  
Collected By \_\_\_\_\_  
Identified By \_\_\_\_\_



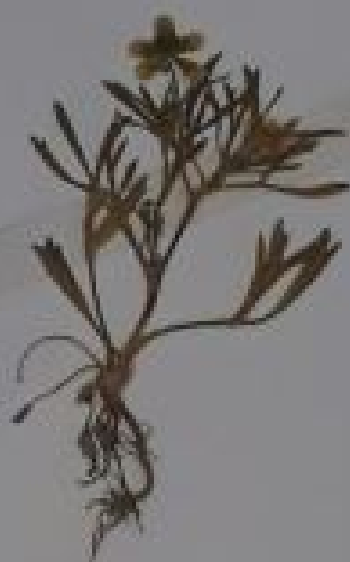

36

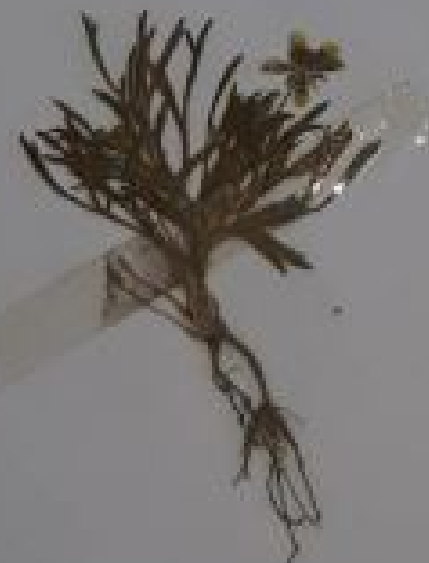

HERBARIUM  
DEPARTMENT OF BOTANY  
PMAS - ARID AGRICULTURE UNIVERSITY RAWALPINDI

Date \_\_\_\_\_  
Accession No. PK5052 Number of Specimen 68  
Habit weed  
Botanical Name *Ranunculus esculentus* Linn  
Local Name Chikombu  
Family Ranunculaceae  
Locality Gorah (Study)  
Date of Collection \_\_\_\_\_  
Collected By Fazal  
Identified By Dr. Rehamat

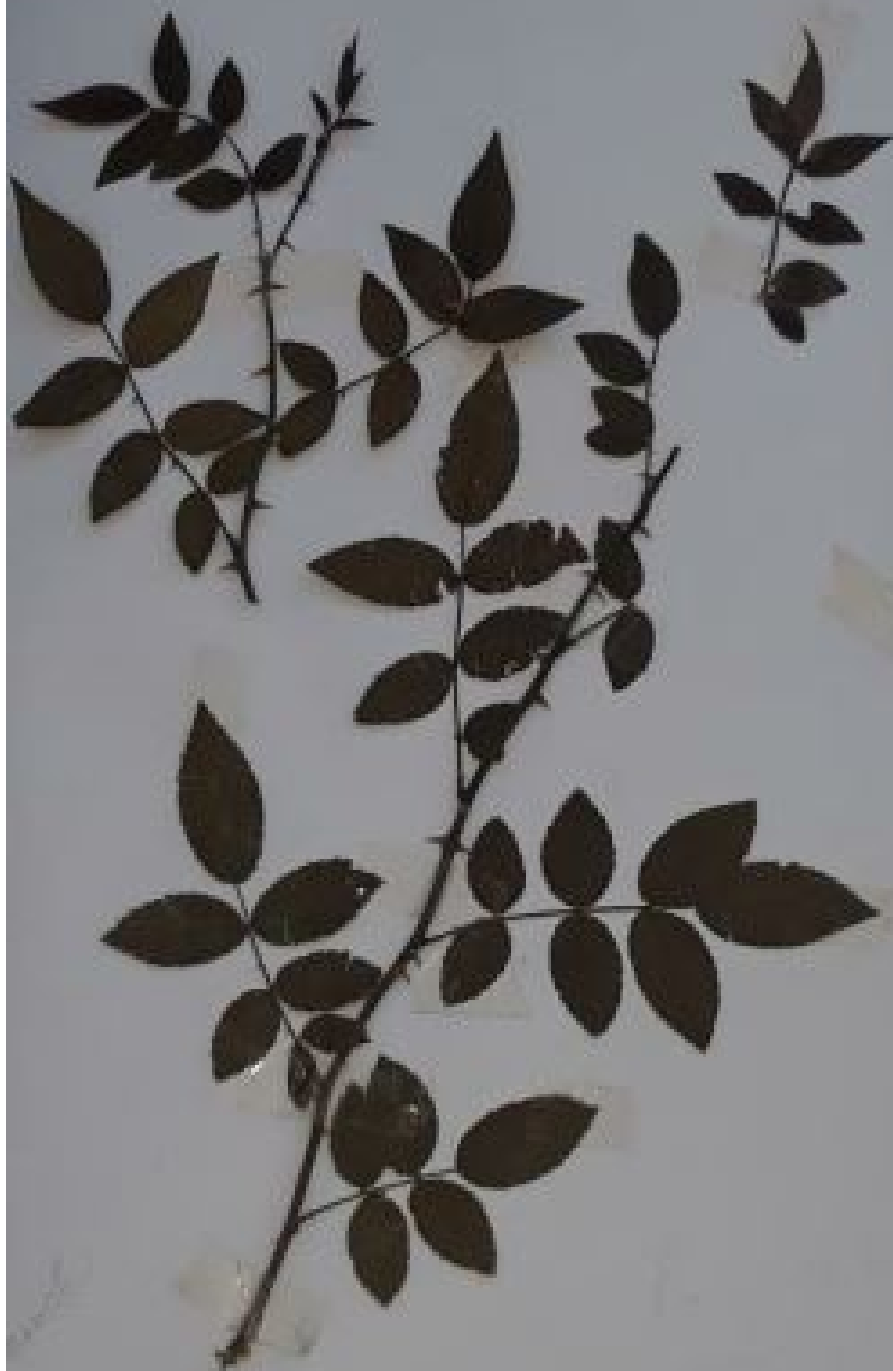

34

HERBARIUM  
DEPARTMENT OF BOTANY  
PMAS - ARID AGRICULTURE UNIVERSITY RAWALPINDI

Date \_\_\_\_\_

Accession No. 2553 Voucher Specimen No. 169

Habit Shrub

Botanical Name *Bauhinia*

Local Name Jarnal

Family Rubiaceae

Locality Gorah Cantta

Date of Collection \_\_\_\_\_

Collected By Farooq

Identified By Dr. Rehamat

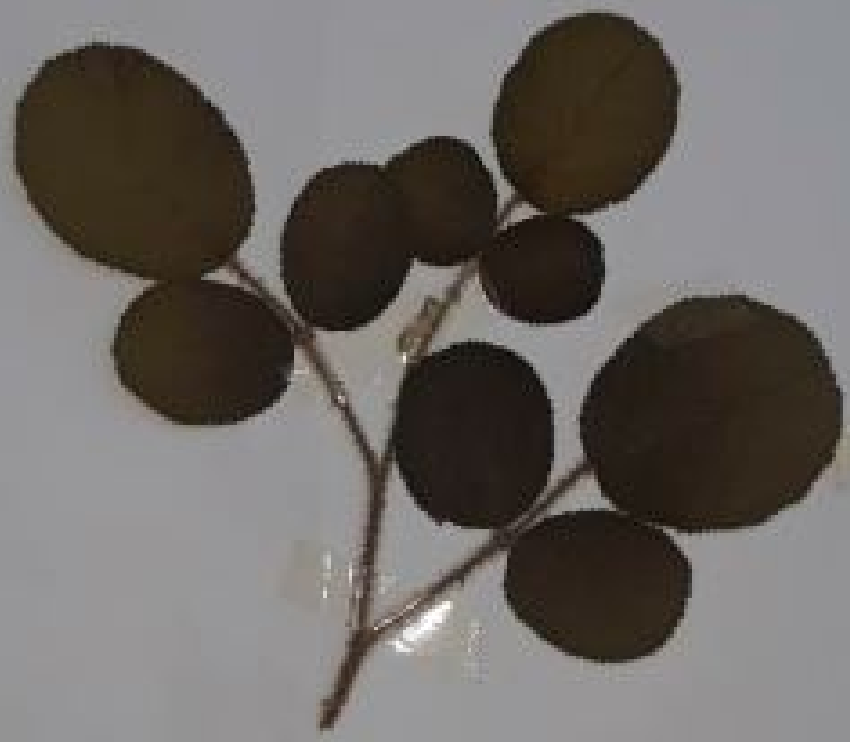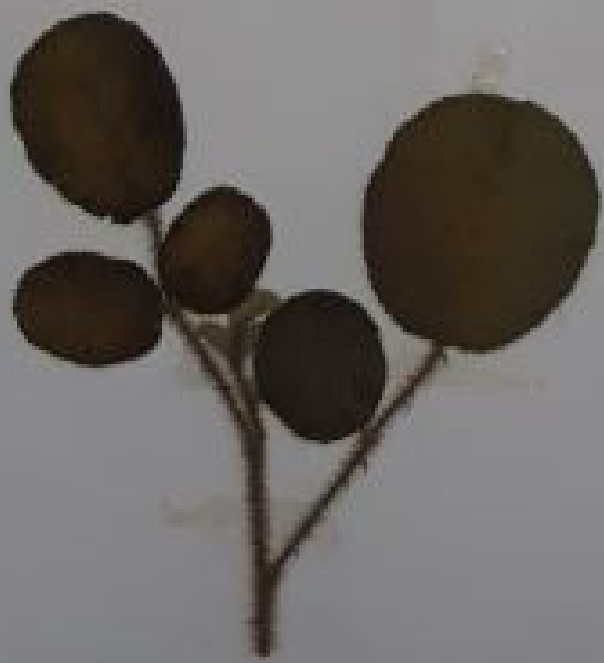

*Rubus fruticosus*

PRAS. ATK. Herbarium of the Faculty of Science, Ain Shams University, Cairo, Egypt  
 Date \_\_\_\_\_  
 Accession No. 5155 Herbarium Specimen No. \_\_\_\_\_  
 Habit Shrub Strawberry  
 Botanical Name Rubus fruticosus  
 Local Name Altraq  
 Family Rosaceae  
 Locality Chalok (Sudh)  
 Date of Collection \_\_\_\_\_  
 Collected By Foad  
 Identified By Dr. Rahmat

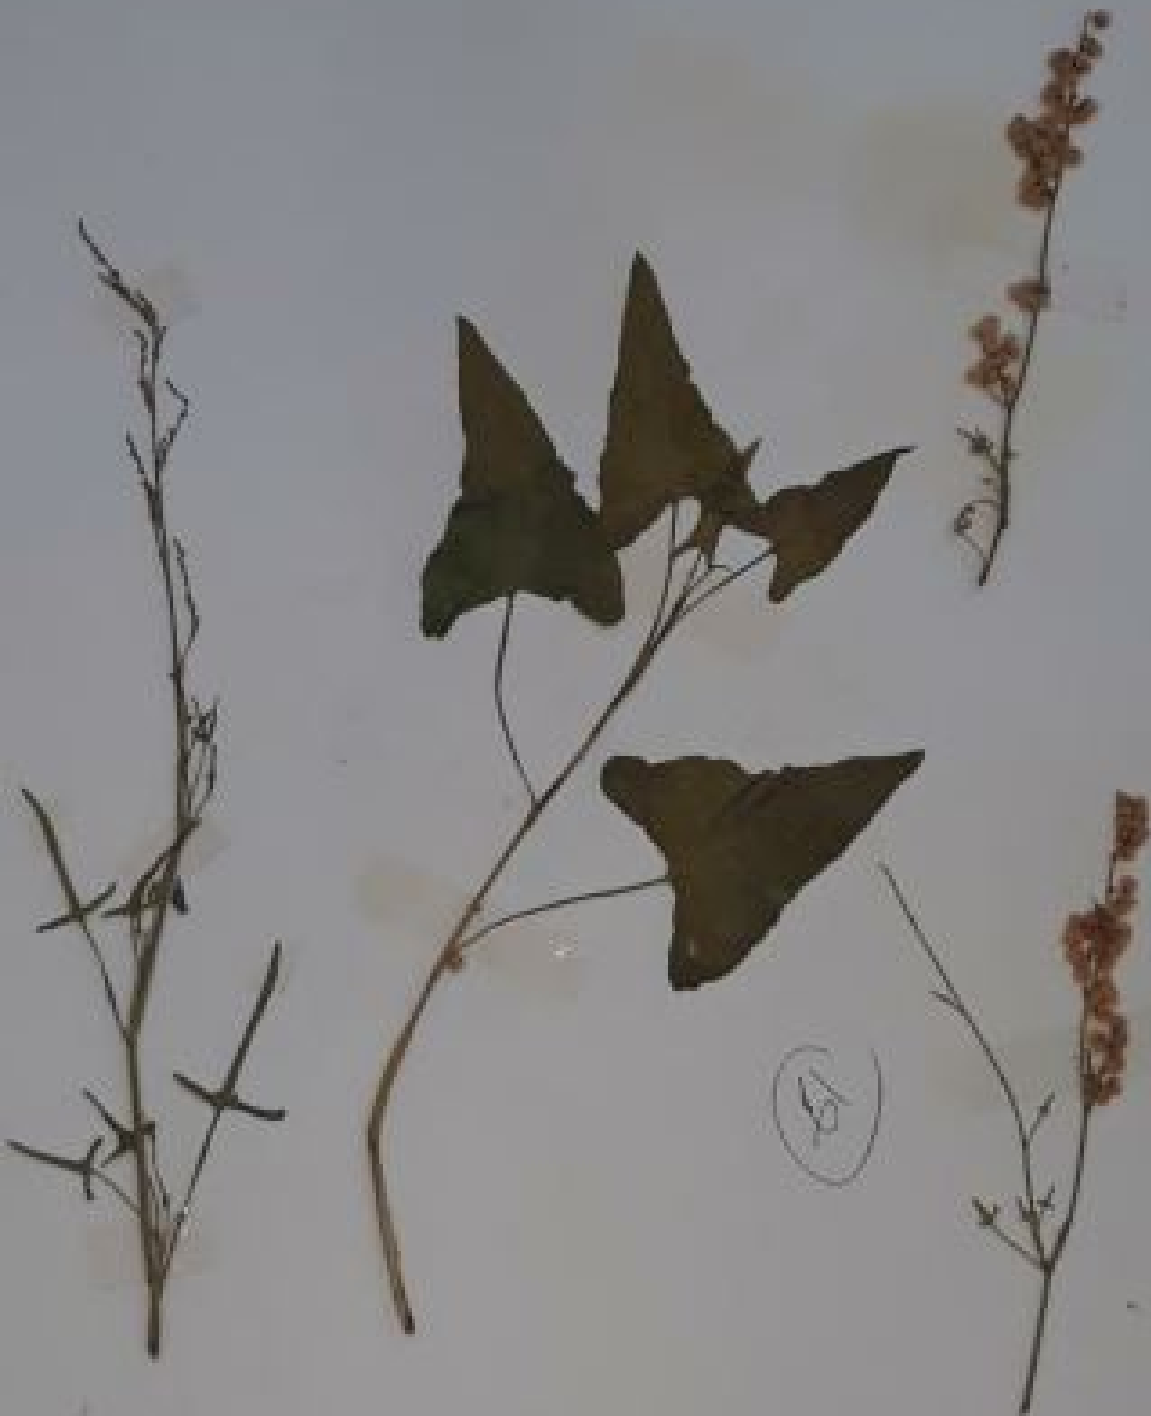

HERBARIUM  
DEPARTMENT OF BOTANY  
PBIAS - ARID AGRICULTURE UNIVERSITY RAWALPINDI

Date \_\_\_\_\_  
Accession No. FA-5051 Voucher Specimen No. 73  
Habit Herb  
Botanical Name *Rumex hastatus* Oakes  
Local Name Chakriya  
Family Ajgoniacae  
Locality In Gulistan (Gardens)  
Date of Collection \_\_\_\_\_  
Collected By Fayaz  
Identified By Dr. Rehman

(12)

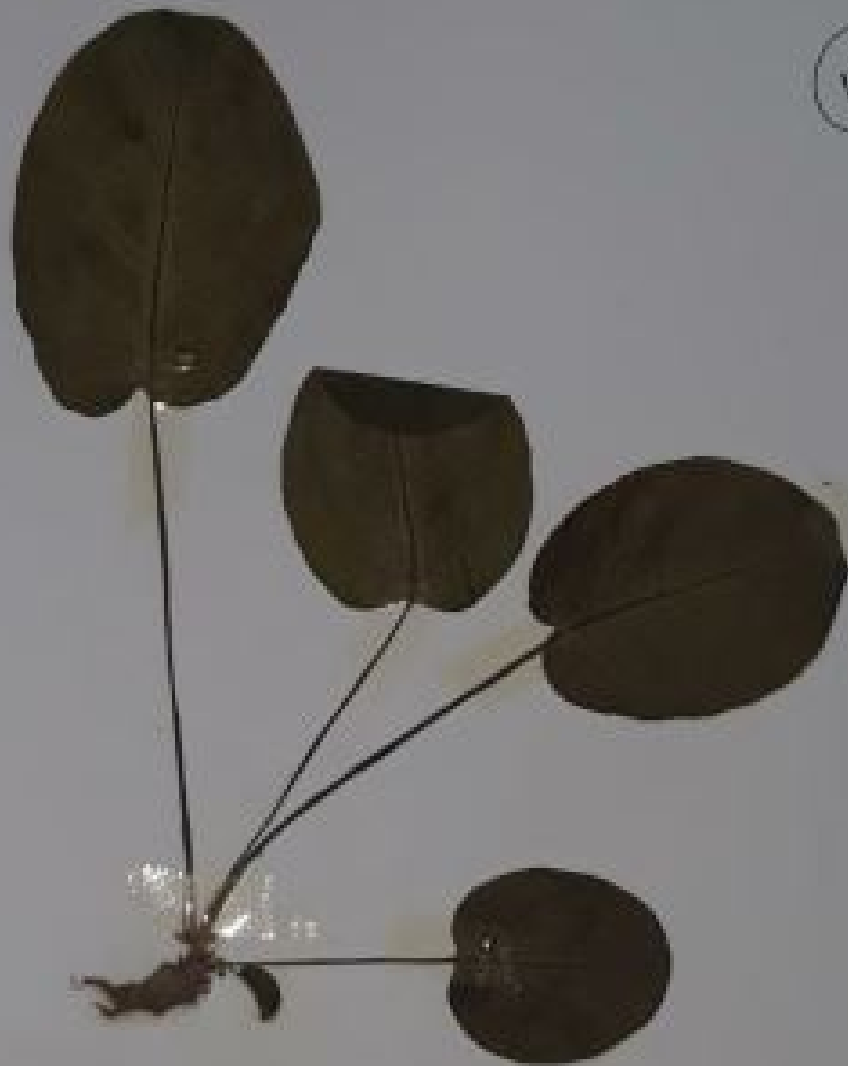

HERBARIUM  
DEPARTMENT OF BOTANY  
PMAS - ARID AGRICULTURE UNIVERSITY RAJAPINDI

Date \_\_\_\_\_  
Accession No. 11553 Voucher specimen No. 73  
Year: 1960  
Botanical Name *Linum nepalense*  
Local Name \_\_\_\_\_  
Family POLYCHALACEAE  
Locality Narayan  
Date of Collection \_\_\_\_\_  
Collected by Arjun Malik  
Determined by Dr. R. S. Mehta



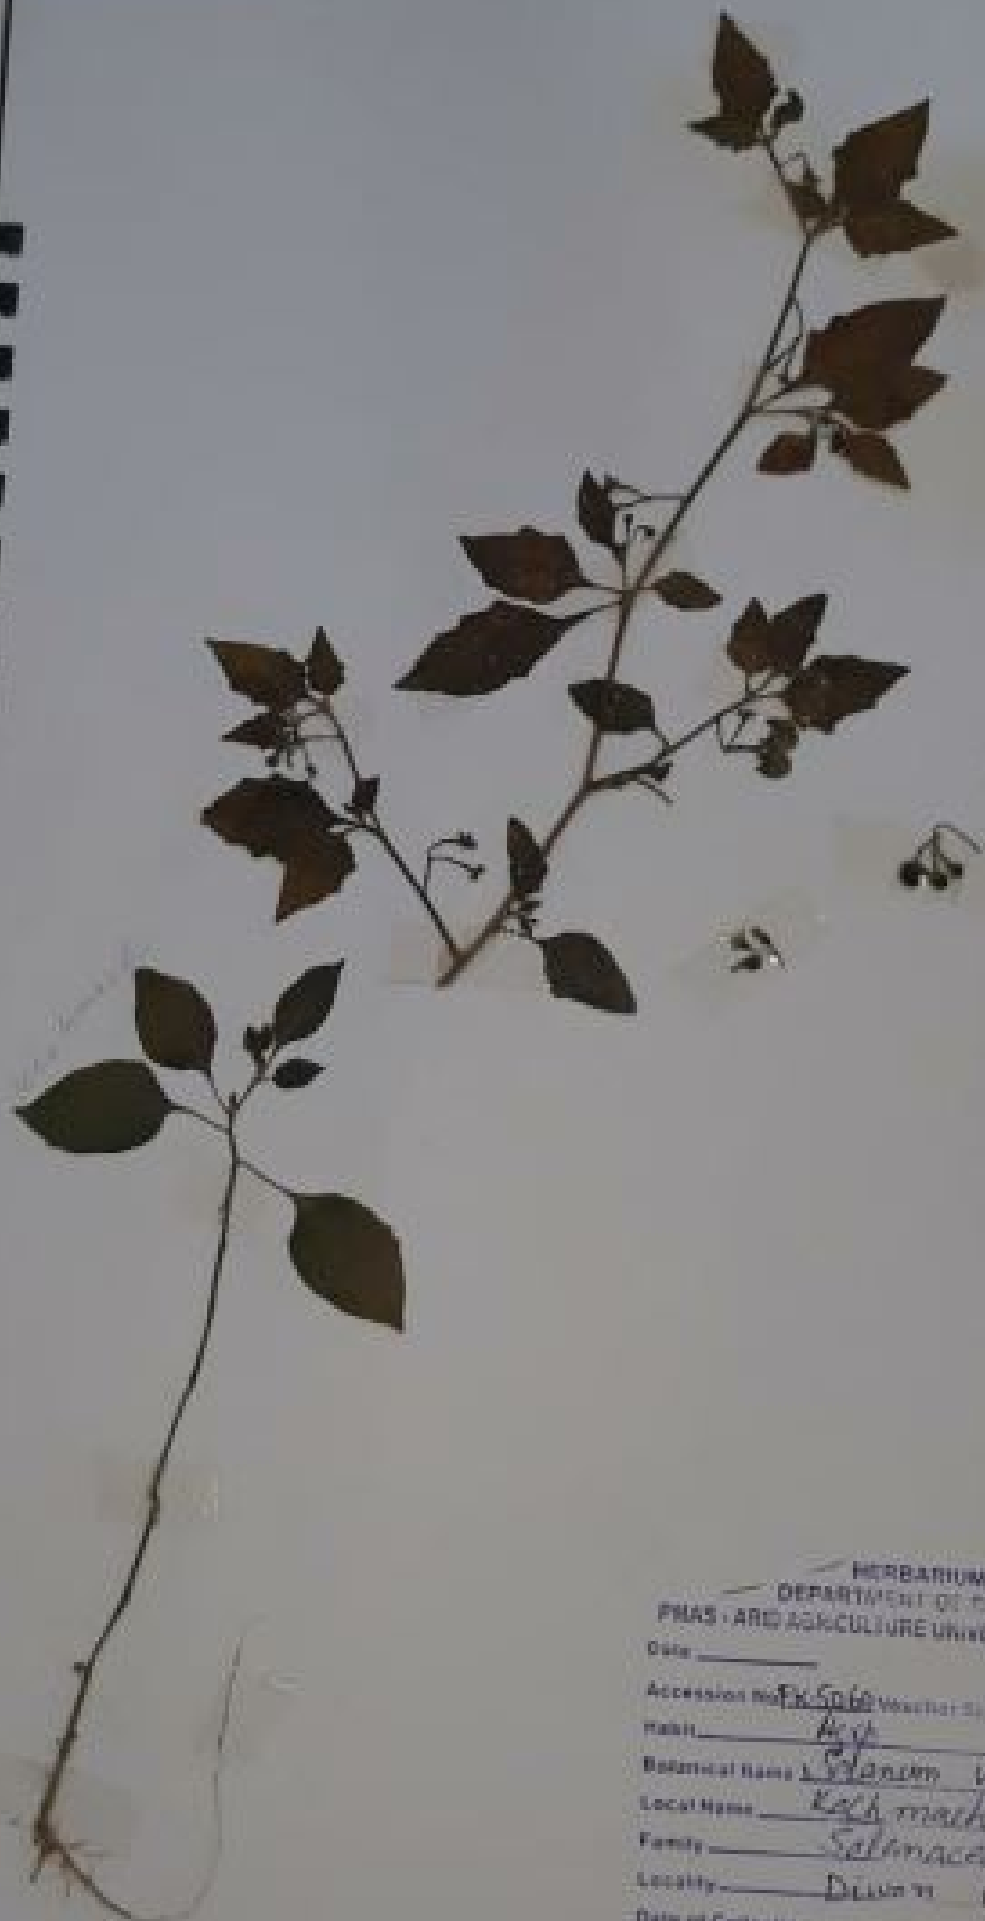

HERBARIUM  
DEPARTMENT OF BOTANY  
PAFSA - AGRICULTURE UNIVERSITY - RAWALPINDI

Date \_\_\_\_\_

Accession No. Pa 506 Voucher Collection No. 77

Plant Herb

Botanical Name *Planum villosum* (L.)

Local Name Kach math

Family Solanaceae

Locality Diwan (Sudh)

Date of Collection \_\_\_\_\_

Collected by Fazal

Identified by Dr. Rehmat

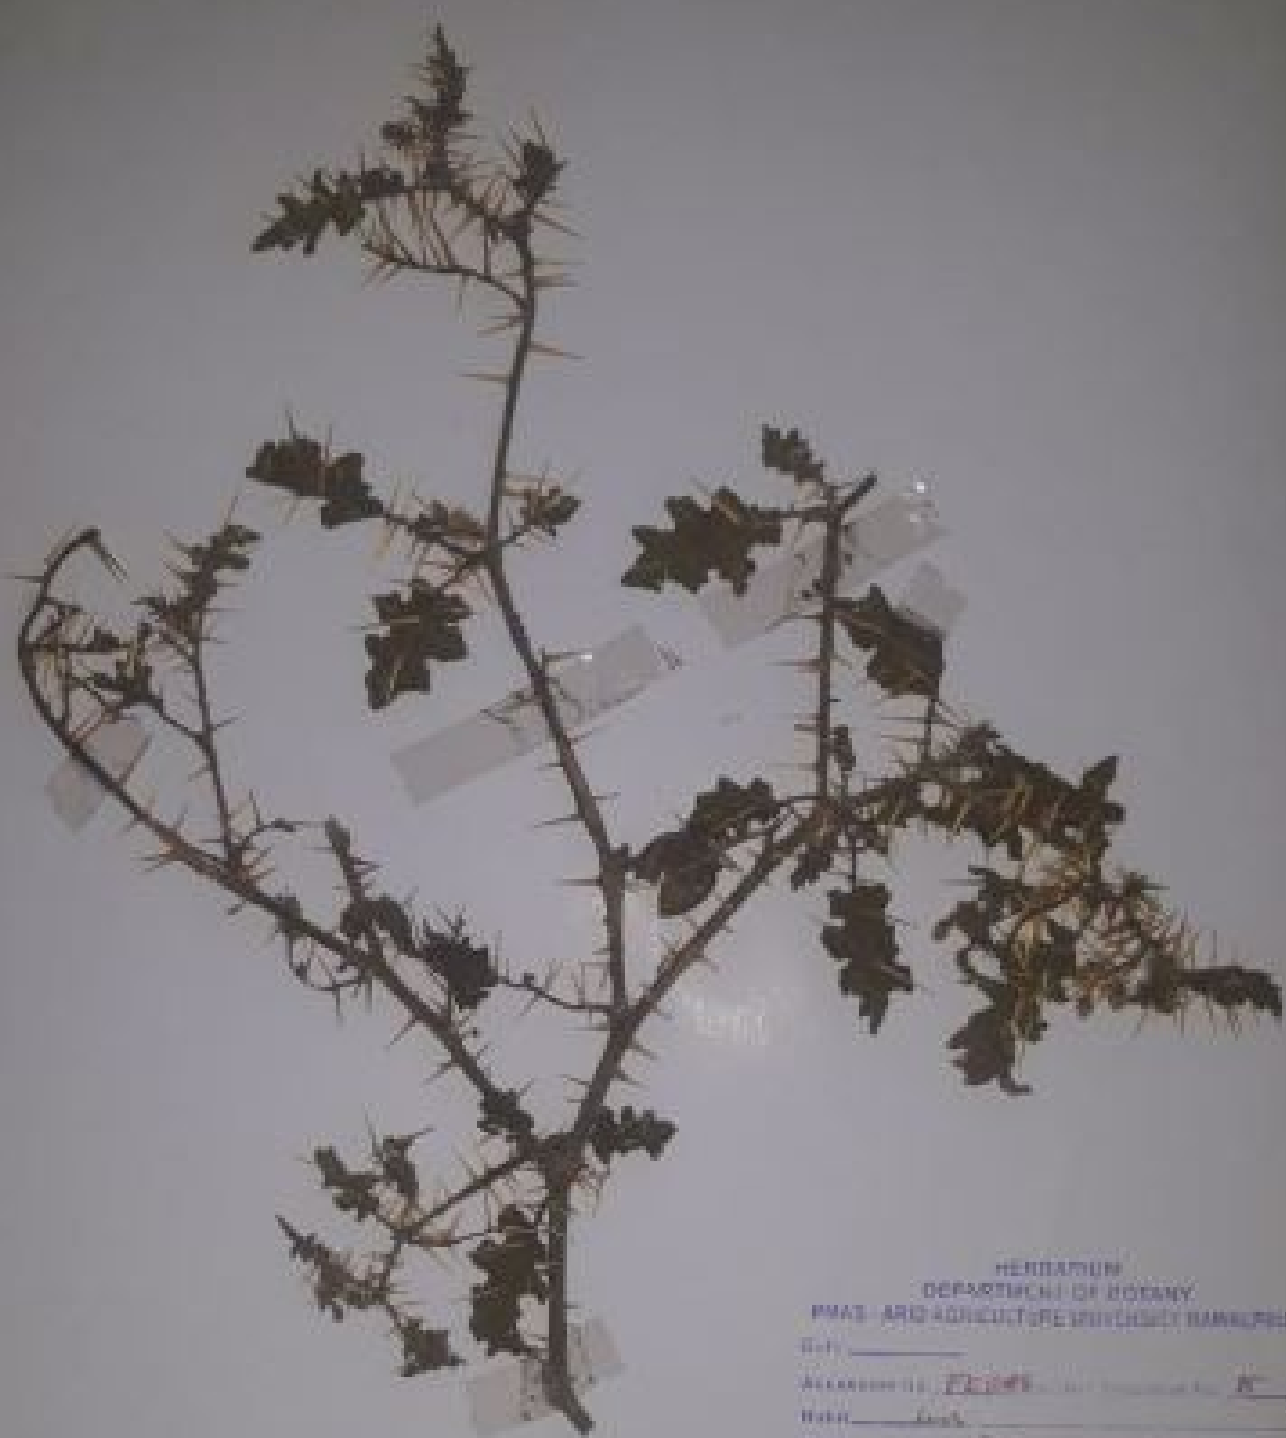

HERBARIUM  
DEPARTMENT OF BOTANY  
PAWIS - AGRICULTURE UNIVERSITY BANGKOK

Date \_\_\_\_\_  
Accession No. PL 208 No. of specimens 10  
Herb. 108  
Botanical Name Solanum sp. 108  
Local Name \_\_\_\_\_  
Family Solanaceae  
Locality \_\_\_\_\_  
Herb. No. \_\_\_\_\_  
Collector Fern  
Number as found

*Solanum sp. 108*  
*Solanum sp. 108*



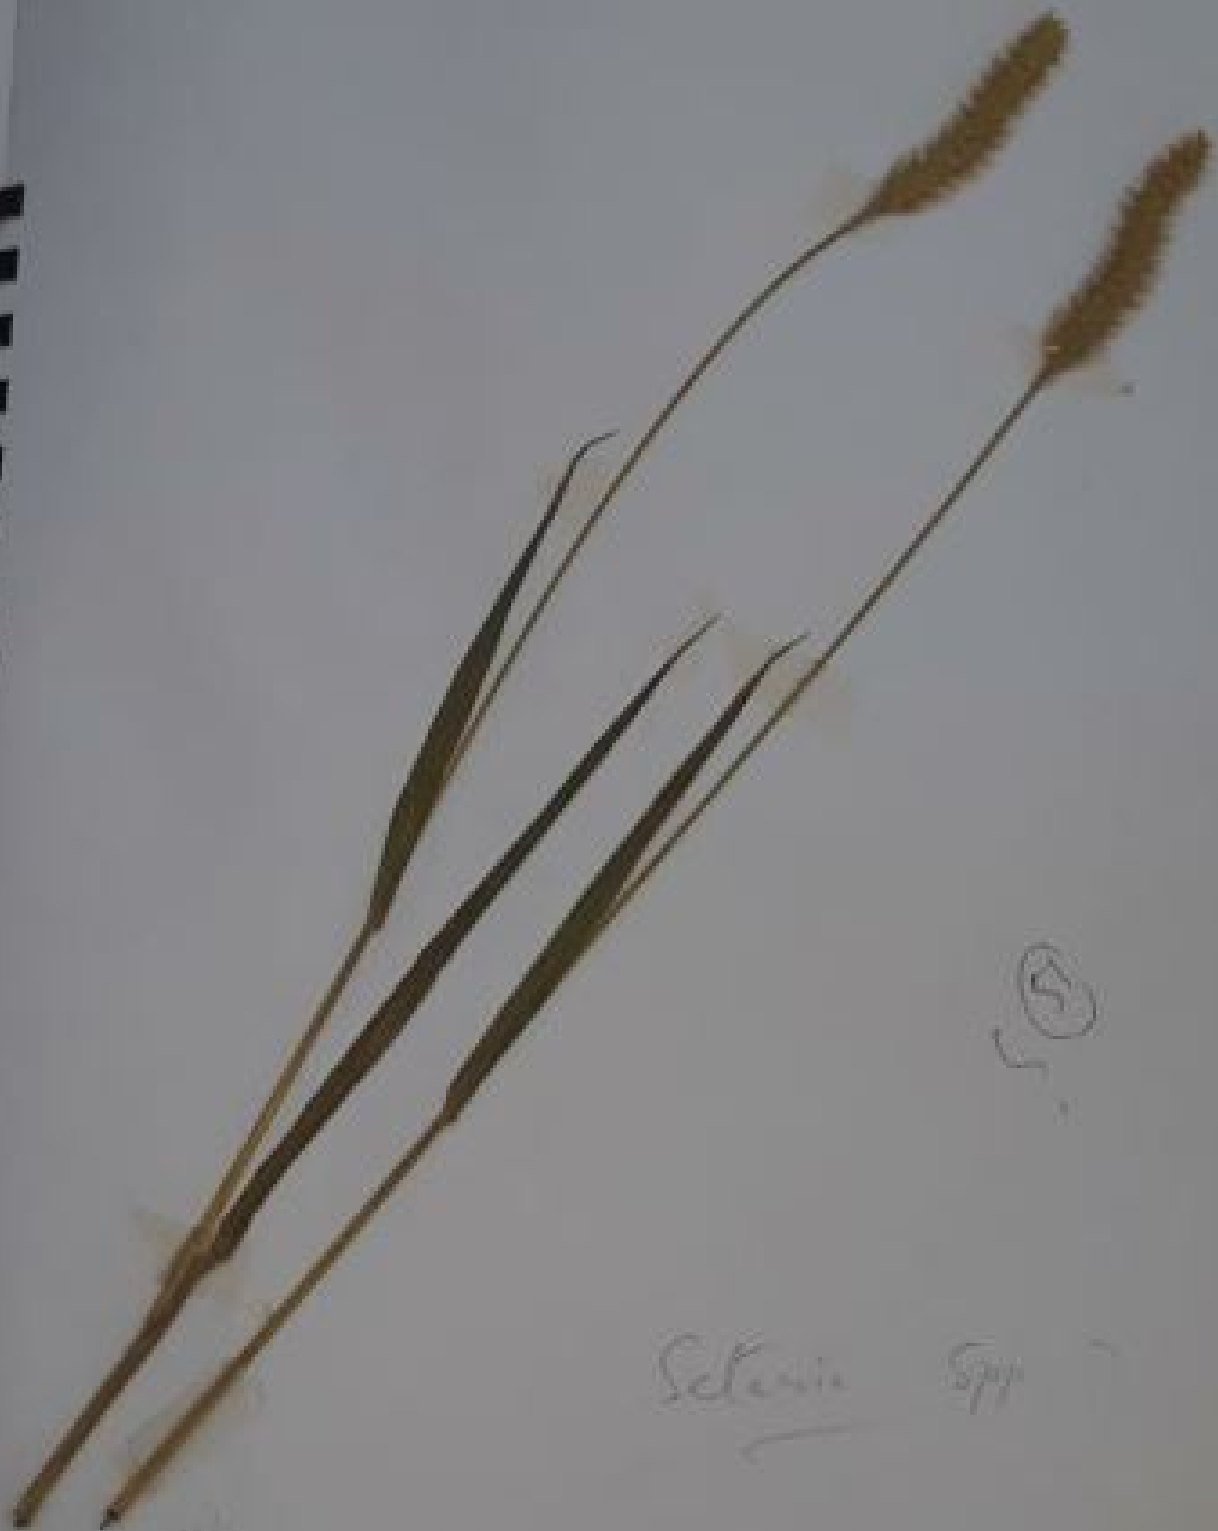

5

*Setaria* spp

50014

HERBARIUM  
DEPARTMENT OF BOTANY  
PMAS - ARID AGRICULTURE UNIVERSITY RAJALPURI

Date \_\_\_\_\_

Accession No. 50014 Voucher Specimen No. 80

Host grass

Botanical Name Setaria viridis

Local Name Somki qah

Family poaceae

Locality Diwan (Sudh)

Date of Collection \_\_\_\_\_

Collected By Farooq

Identified By Dr. Rehman

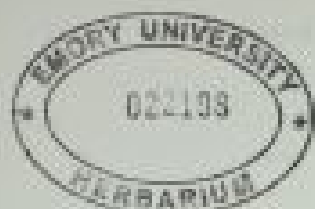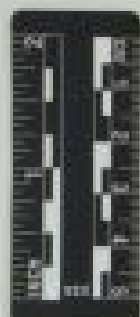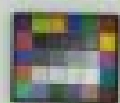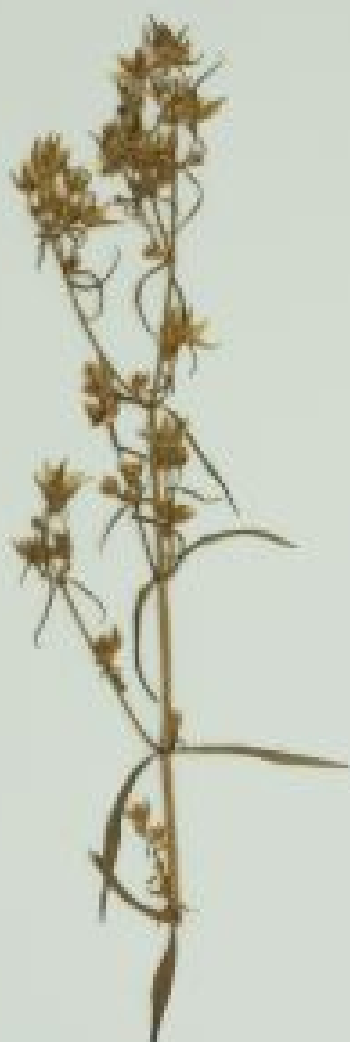

INCORPORATED INTO THE  
MEDICAL BOTANY SPECIAL COLLECTION

PK-103

EMORY UNIVERSITY HERBARIUM  
FLORA OF ISLAMIC REPUBLIC OF PAKISTAN

Swartzia chinensis (Swartz) Planch. et G.B. Clarke GENTIANACEAE  
"Jilweera"

District District, Baluchistan, Azad Kashmir, Islamic Republic of Pakistan

wild herb, abundant

whitish yellow flowers, bitter to taste

roots have cooling effect used to treat diabetes and liver problems  
local name: Chras

Muhammad Farid Khan PK-103

10 October 2017

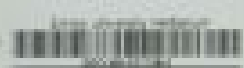

Michelle Lim

25 September 2017

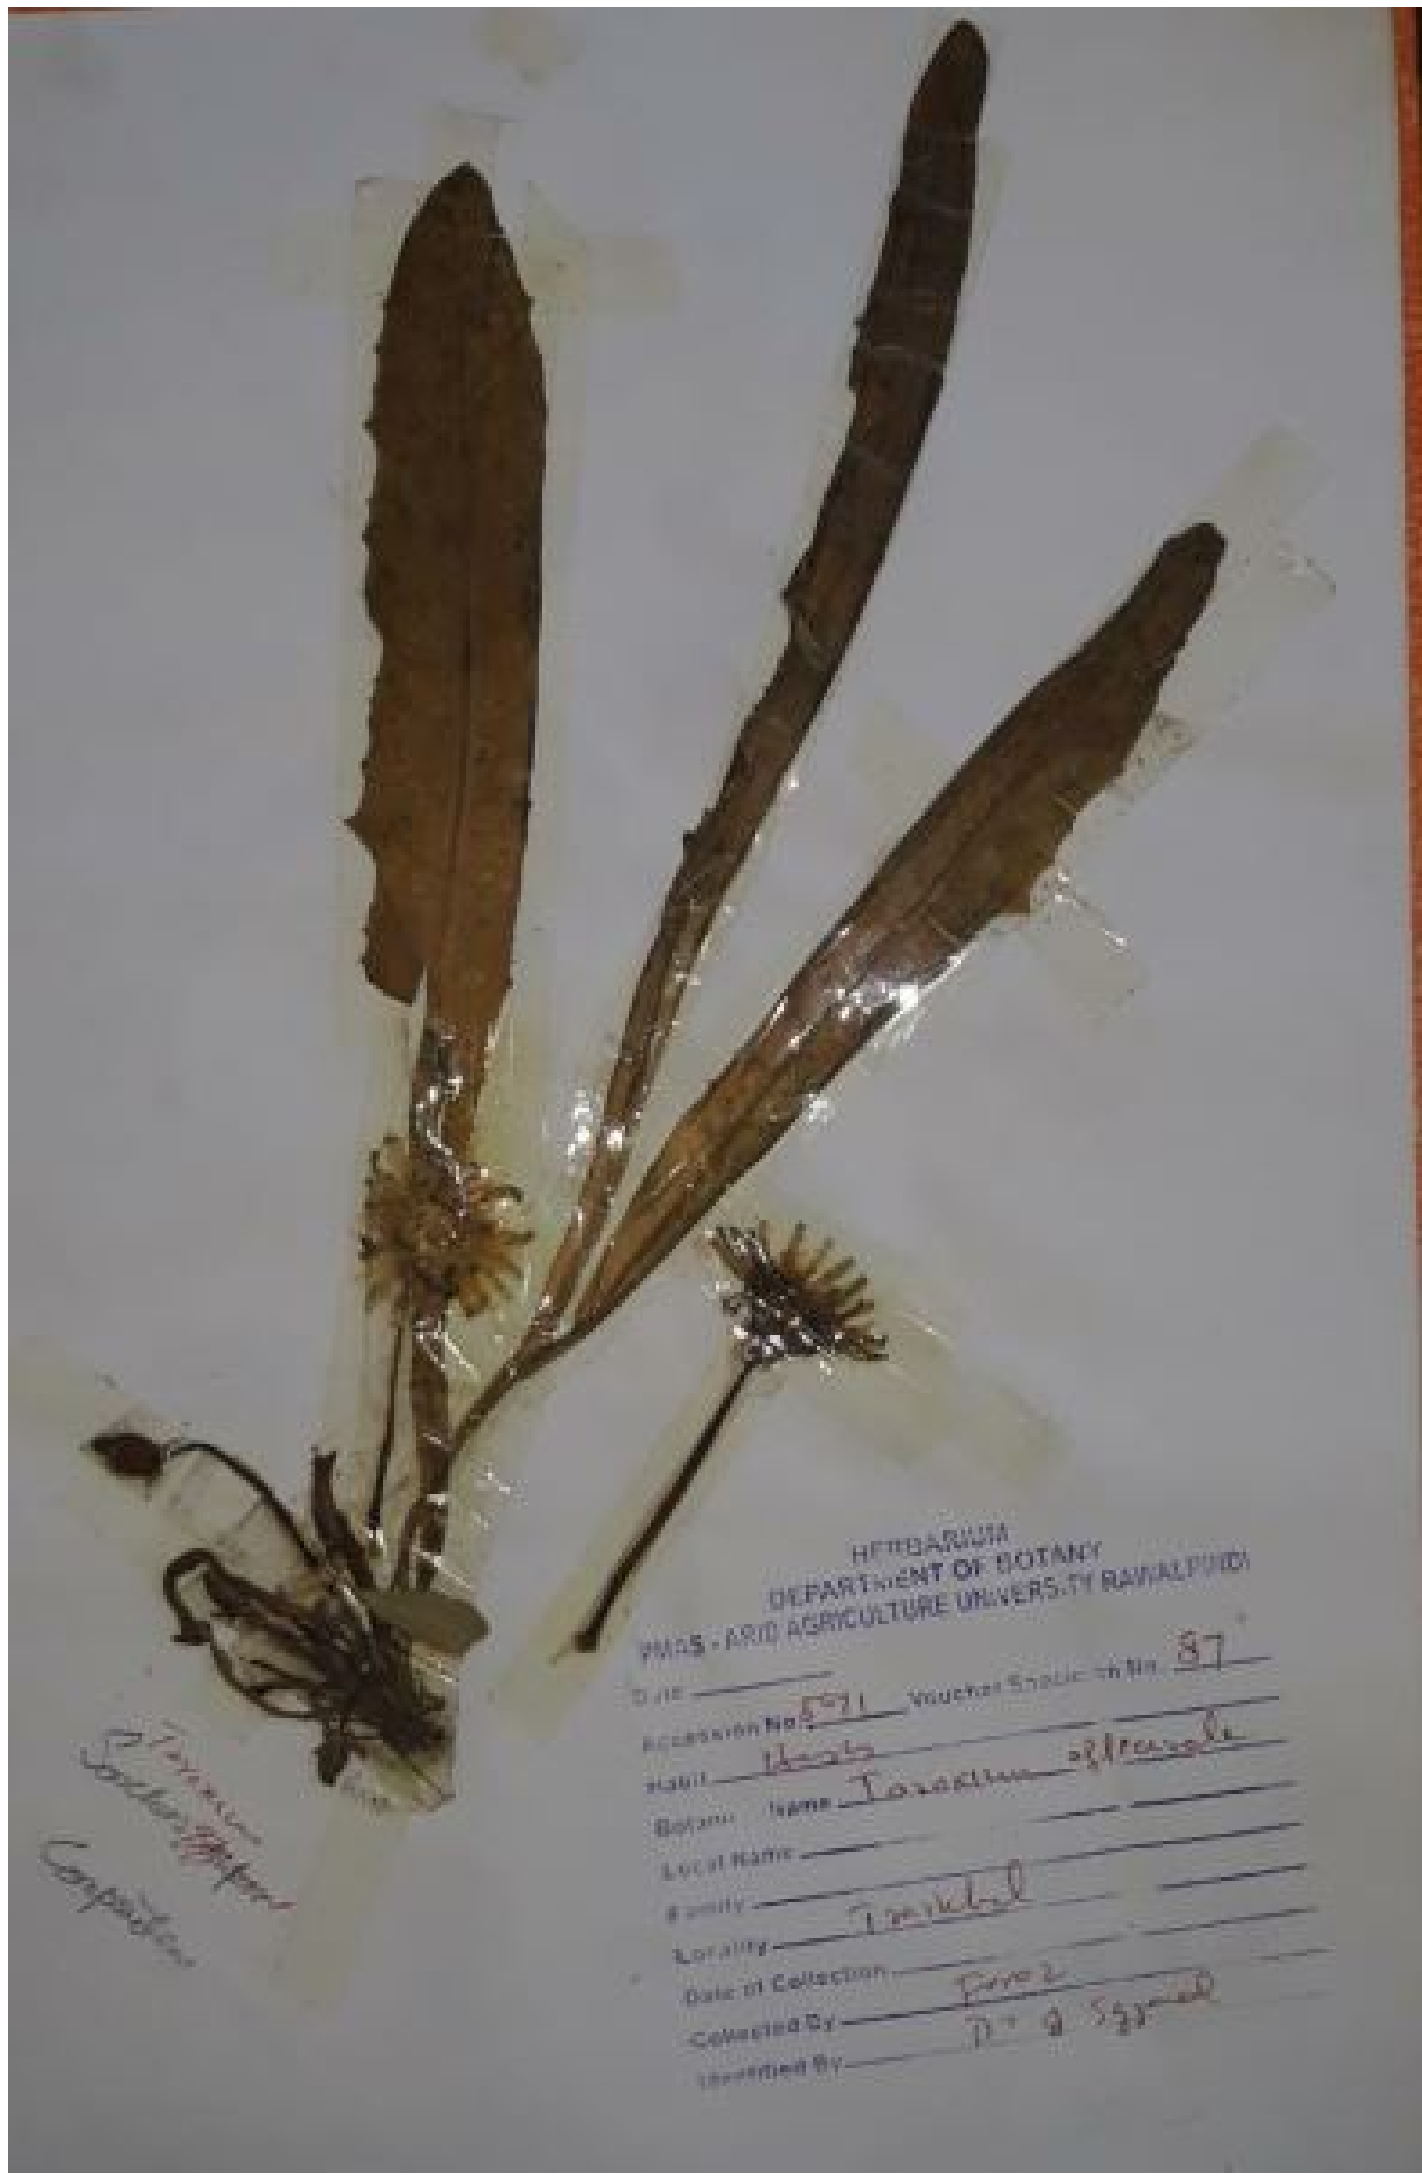

HERBARIUM  
DEPARTMENT OF BOTANY  
PAAS - ARID AGRICULTURE UNIVERSITY RAJALPURI

Date \_\_\_\_\_  
Accession No. 5071 Voucher Specimen No. 87  
Habit Herb  
Botanical Name Taraxacum officinale  
Local Name \_\_\_\_\_  
Family \_\_\_\_\_  
Locality Tankhal  
Date of Collection \_\_\_\_\_  
Collected By Puro 2  
Identified By D. A. S. S. S.

*Taraxacum officinale*  
Compositae

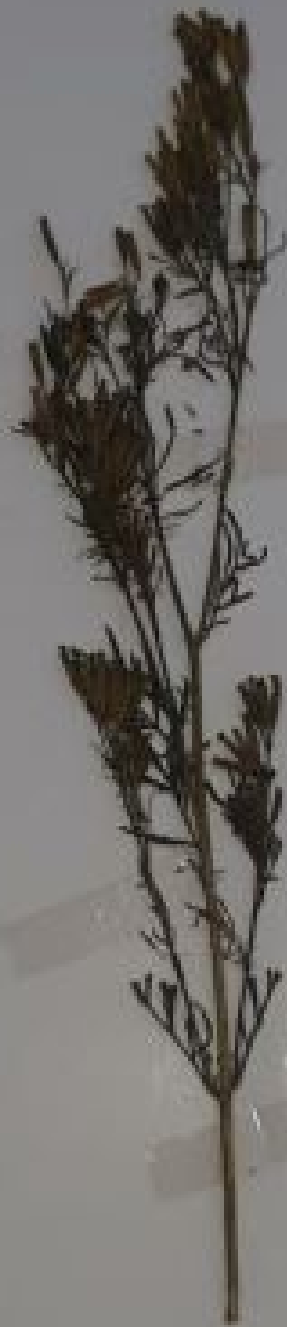

*Tagetes minuta*

DEPARTMENT OF BOTANY  
UNIVERSITY OF KARACHI

Herbarium No. 82

Scientific Name Tagetes Minuta

Local Name \_\_\_\_\_

Number (Sindh)

Family Fam. Compositae

Dr. Rehmat

Looking for?

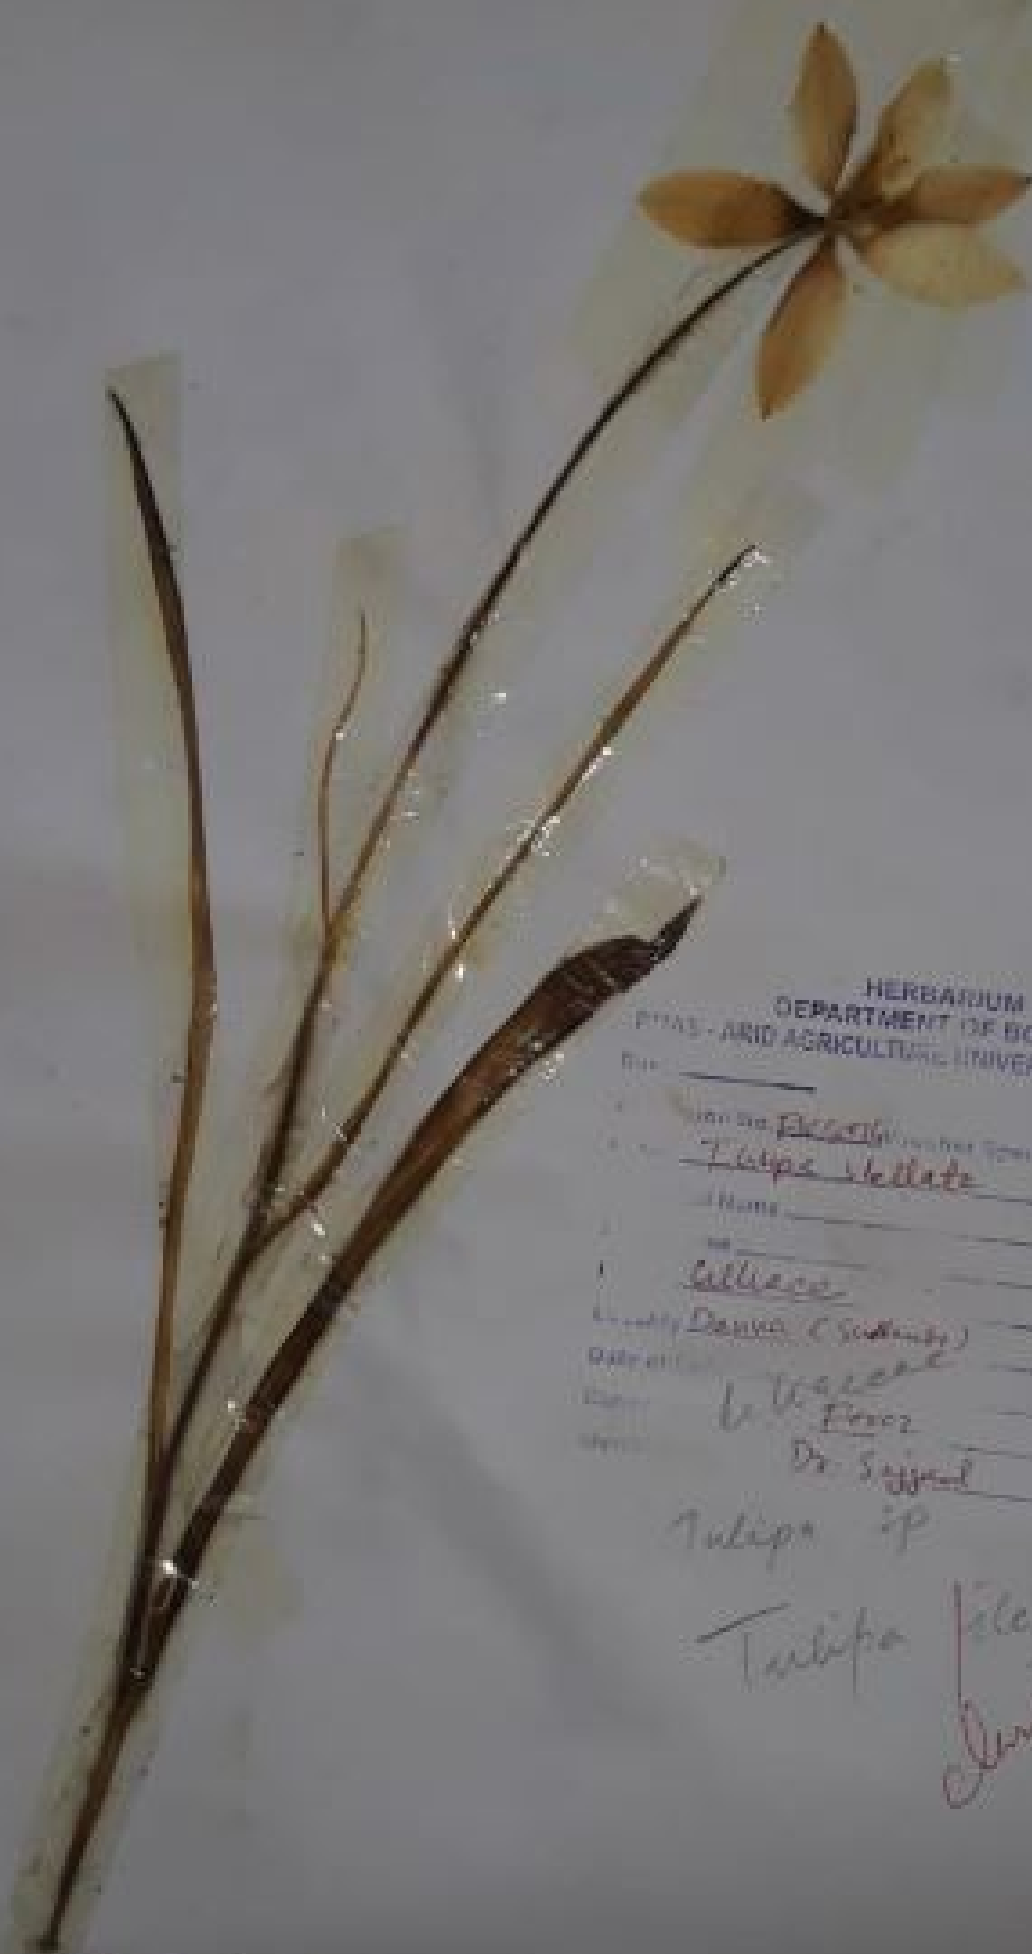

HERBARIUM  
DEPARTMENT OF BOTANY  
PAKISTAN AGRICULTURE UNIVERSITY RAWALPINDI

Date: \_\_\_\_\_  
No. of Sheets: \_\_\_\_\_  
Collector: Tulipa bellata  
Locality: \_\_\_\_\_  
Date: \_\_\_\_\_  
Collector: W. W. Feroz  
Dr. Sajjad

Tulipa sp

Tulipa bellata  
Herbarium

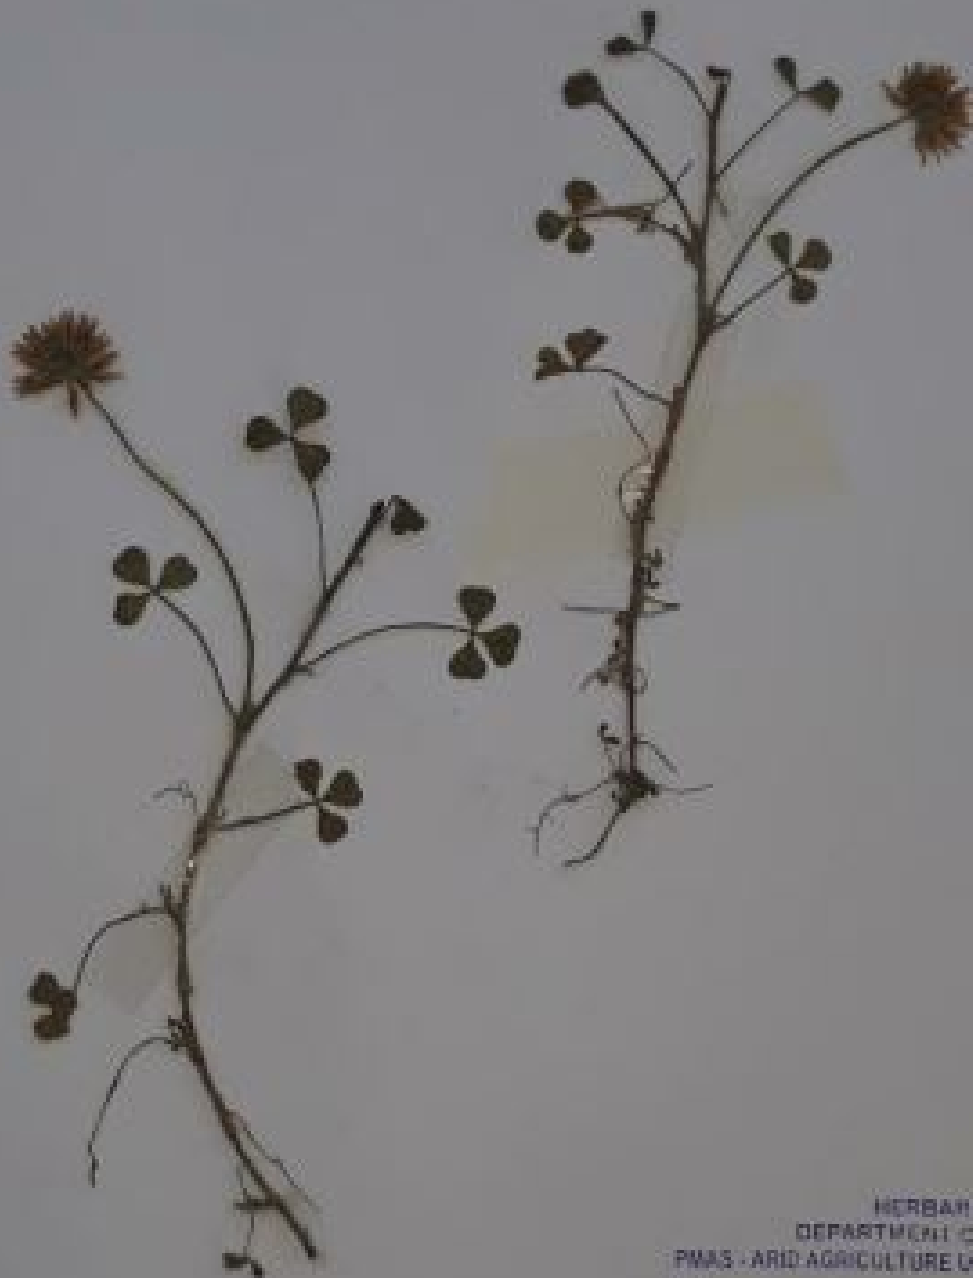

75

HERBARIUM  
DEPARTMENT OF BOTANY  
PMAS - ARID AGRICULTURE UNIVERSITY RAWALPINDI

Date \_\_\_\_\_

Accession No. 507 Voucher Specimen No. 90

Host \_\_\_\_\_

Botanical Name Mimulus repens L.

Local Name Shall / pholl

Family Labiales

Locality Pantthal

Date of Collection \_\_\_\_\_

Collected By Feras

Identified By Dr. Rehmat

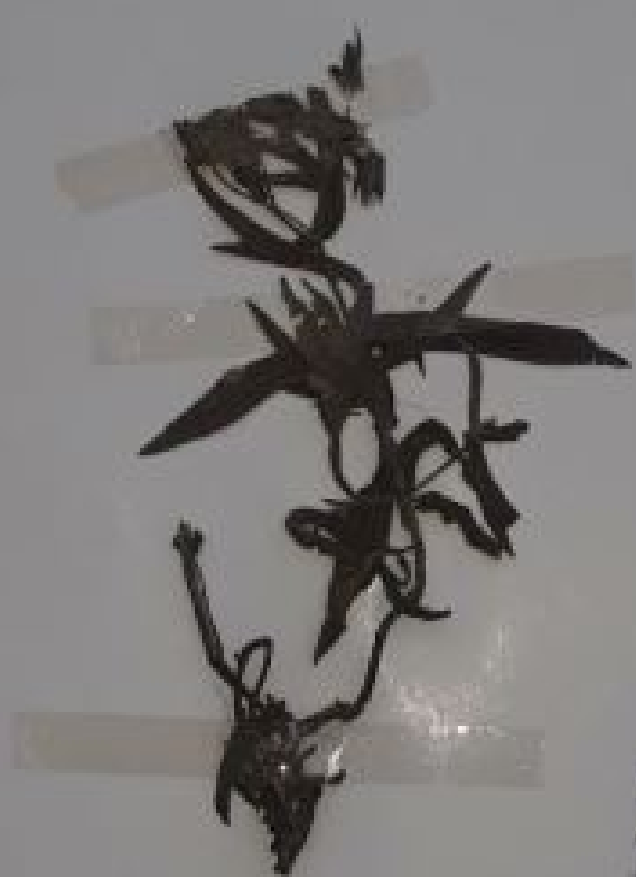

HERBARIUM  
DEPARTMENT OF BOTANY  
AND AGRICULTURE UNIVERSITY  
No. \_\_\_\_\_  
Accession No. FL-6035 91  
Date \_\_\_\_\_  
Botanical Name Trichodesma indicum  
Local Name \_\_\_\_\_  
Collector Mang (Sudh)  
Date of Collection \_\_\_\_\_  
Collector's Name Faraj  
Dr. Rehmat

*Trichodesma indicum*

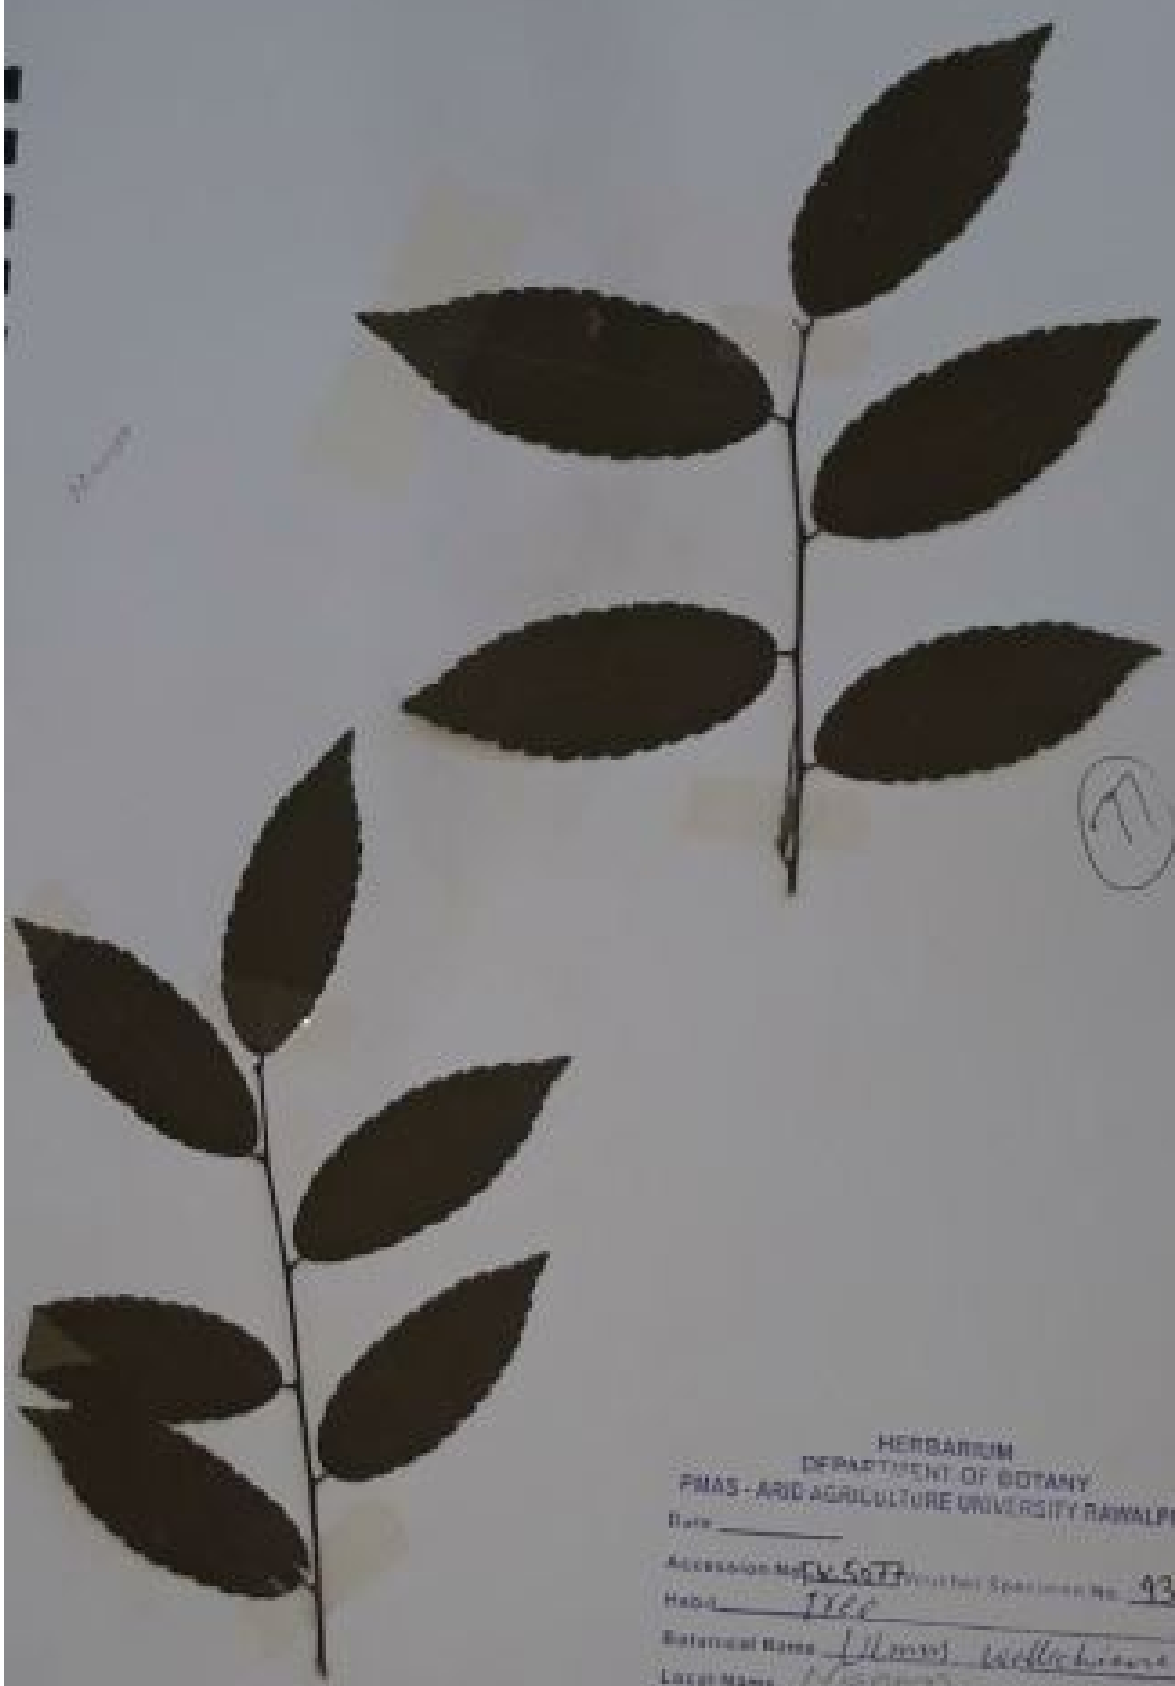

HERBARIUM  
DEPARTMENT OF BOTANY  
PMAS - ARID AGRICULTURE UNIVERSITY RAHWALPINDI

Date \_\_\_\_\_  
Accession No. 1166 Herbarium Specimen No. 93  
Habit Tree  
Botanical Name *Alnus mollissima* Pinet  
Local Name Wahar  
Family Ulmaceae  
Locality Pillandri (Sudhi)  
Date of Collection \_\_\_\_\_  
Collected By Feroz  
Identified By Dr. Rehmat



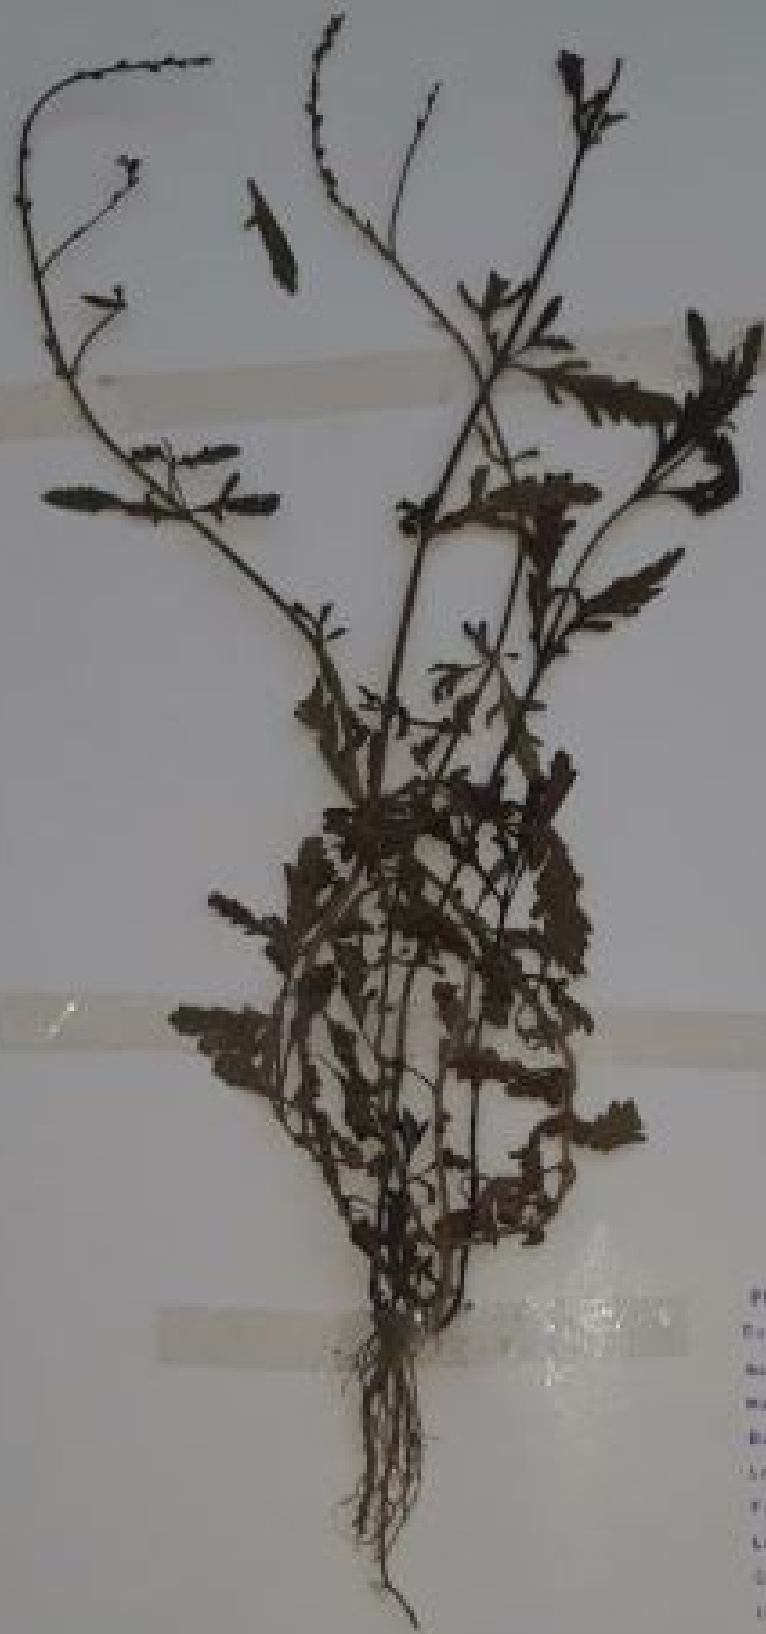

HERBARIUM  
DEPARTMENT OF BOTANY  
PMAS - ARS AGRICULTURE UNIVERSITY RAWALPINDI

Date \_\_\_\_\_  
Accession No. PK 5019 Herbarium 95  
Plant \_\_\_\_\_  
Botanical Name Verbena officinalis  
Local Name \_\_\_\_\_  
Family \_\_\_\_\_  
Locality Pakistan Sher Khan  
Date of Collection \_\_\_\_\_  
Collector(s) Farooq  
Number of Sheets one Sheet

*Verbena officinalis*

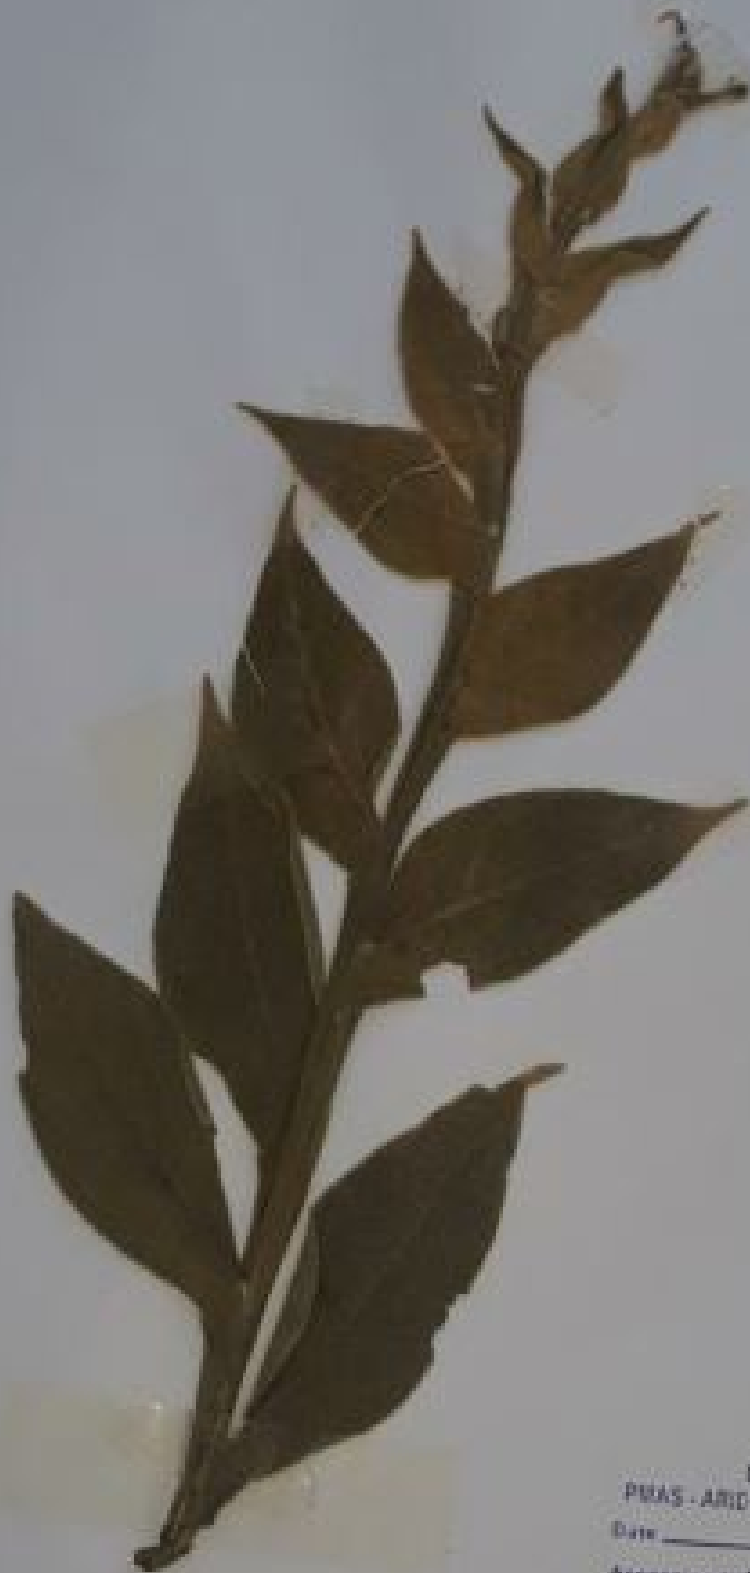

(96)

HERBARIUM  
DEPARTMENT OF BOTANY  
PMAS - ARID AGRICULTURE UNIVERSITY RAWALPINDI

Date \_\_\_\_\_  
Accession No. PK-6280 Voucher Specimen No. 96  
Habit Herb  
Botanical Name Verbena thapsus Linn  
Local Name KAKROT Tambala  
Family Verbenaceae  
Locality Slair (Sindh)  
Date of Collection \_\_\_\_\_  
Collected By Fayaz  
Identified By Dr. Rehmat

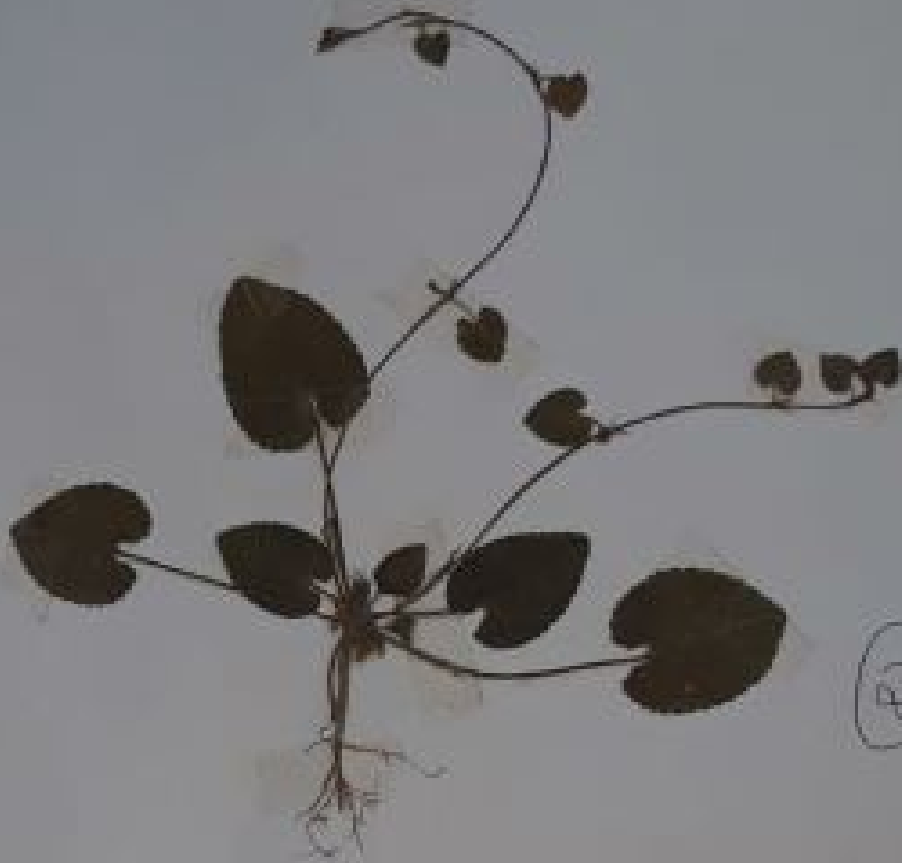

82

HERBARIUM  
DEPARTMENT OF PLANT  
PMAS - ARID AGRICULTURE UNIVERSITY RAWALPINDI  
Date \_\_\_\_\_  
Accession No. 552 Voucher Specimen No. 98  
Habit Herb  
Botanical Name *Vilfa odorata*  
Local Name Gul-Nakha  
Family Violaceae  
Locality Dhandbachi (Cuddi)  
Date of Collection \_\_\_\_\_  
Collected By Fazal  
Herbarium No. Dr. Rehman

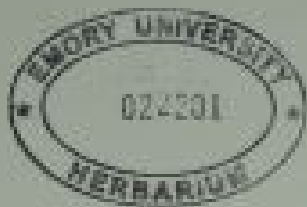

INCORPORATED INTO THE  
MEDICAL BOTANY SPECIAL COLLECTION

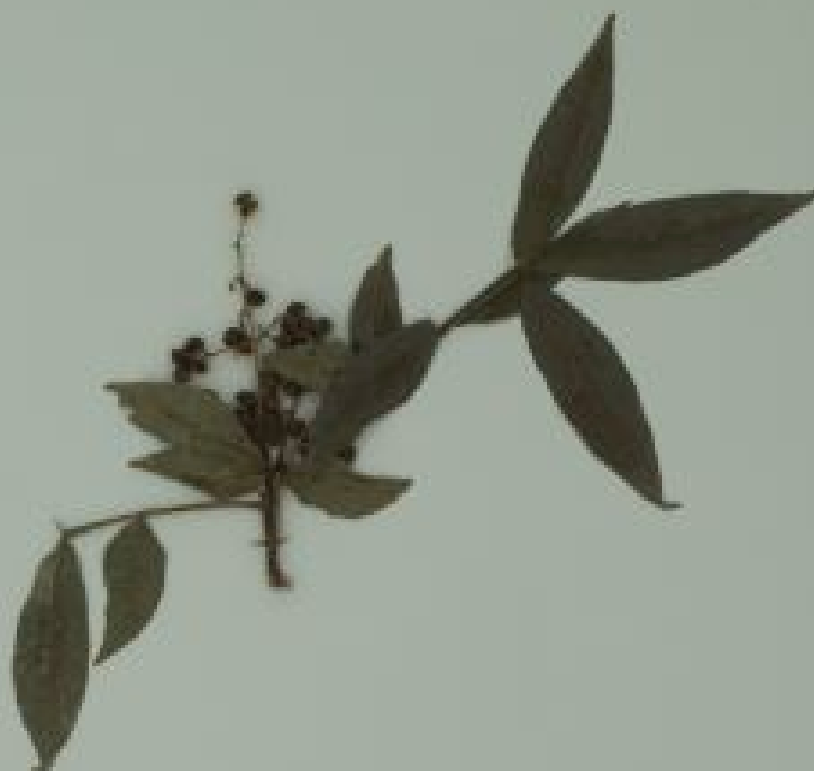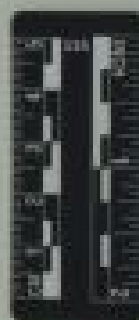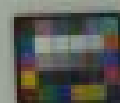

PK-71

Wahidullah Khan  
10/10/2016 - 2017

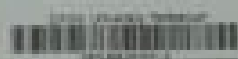

**EMORY UNIVERSITY HERBARIUM**  
FLORA OF ISLAMIC REPUBLIC OF PAKISTAN

*Zanthoxylum armatum* DC. RUTACEAE  
"wajid prickly ash"

Bawal, Palimbi, Azad Kashmir, Islamic Republic of Pakistan.

Distributed in Bangladesh dry areas; common

shrub. Flowers less conspicuous, prominent wood, thorns on the stem

local name: wajid

Muhammad Yasir Khan PK-71

04 April 2016

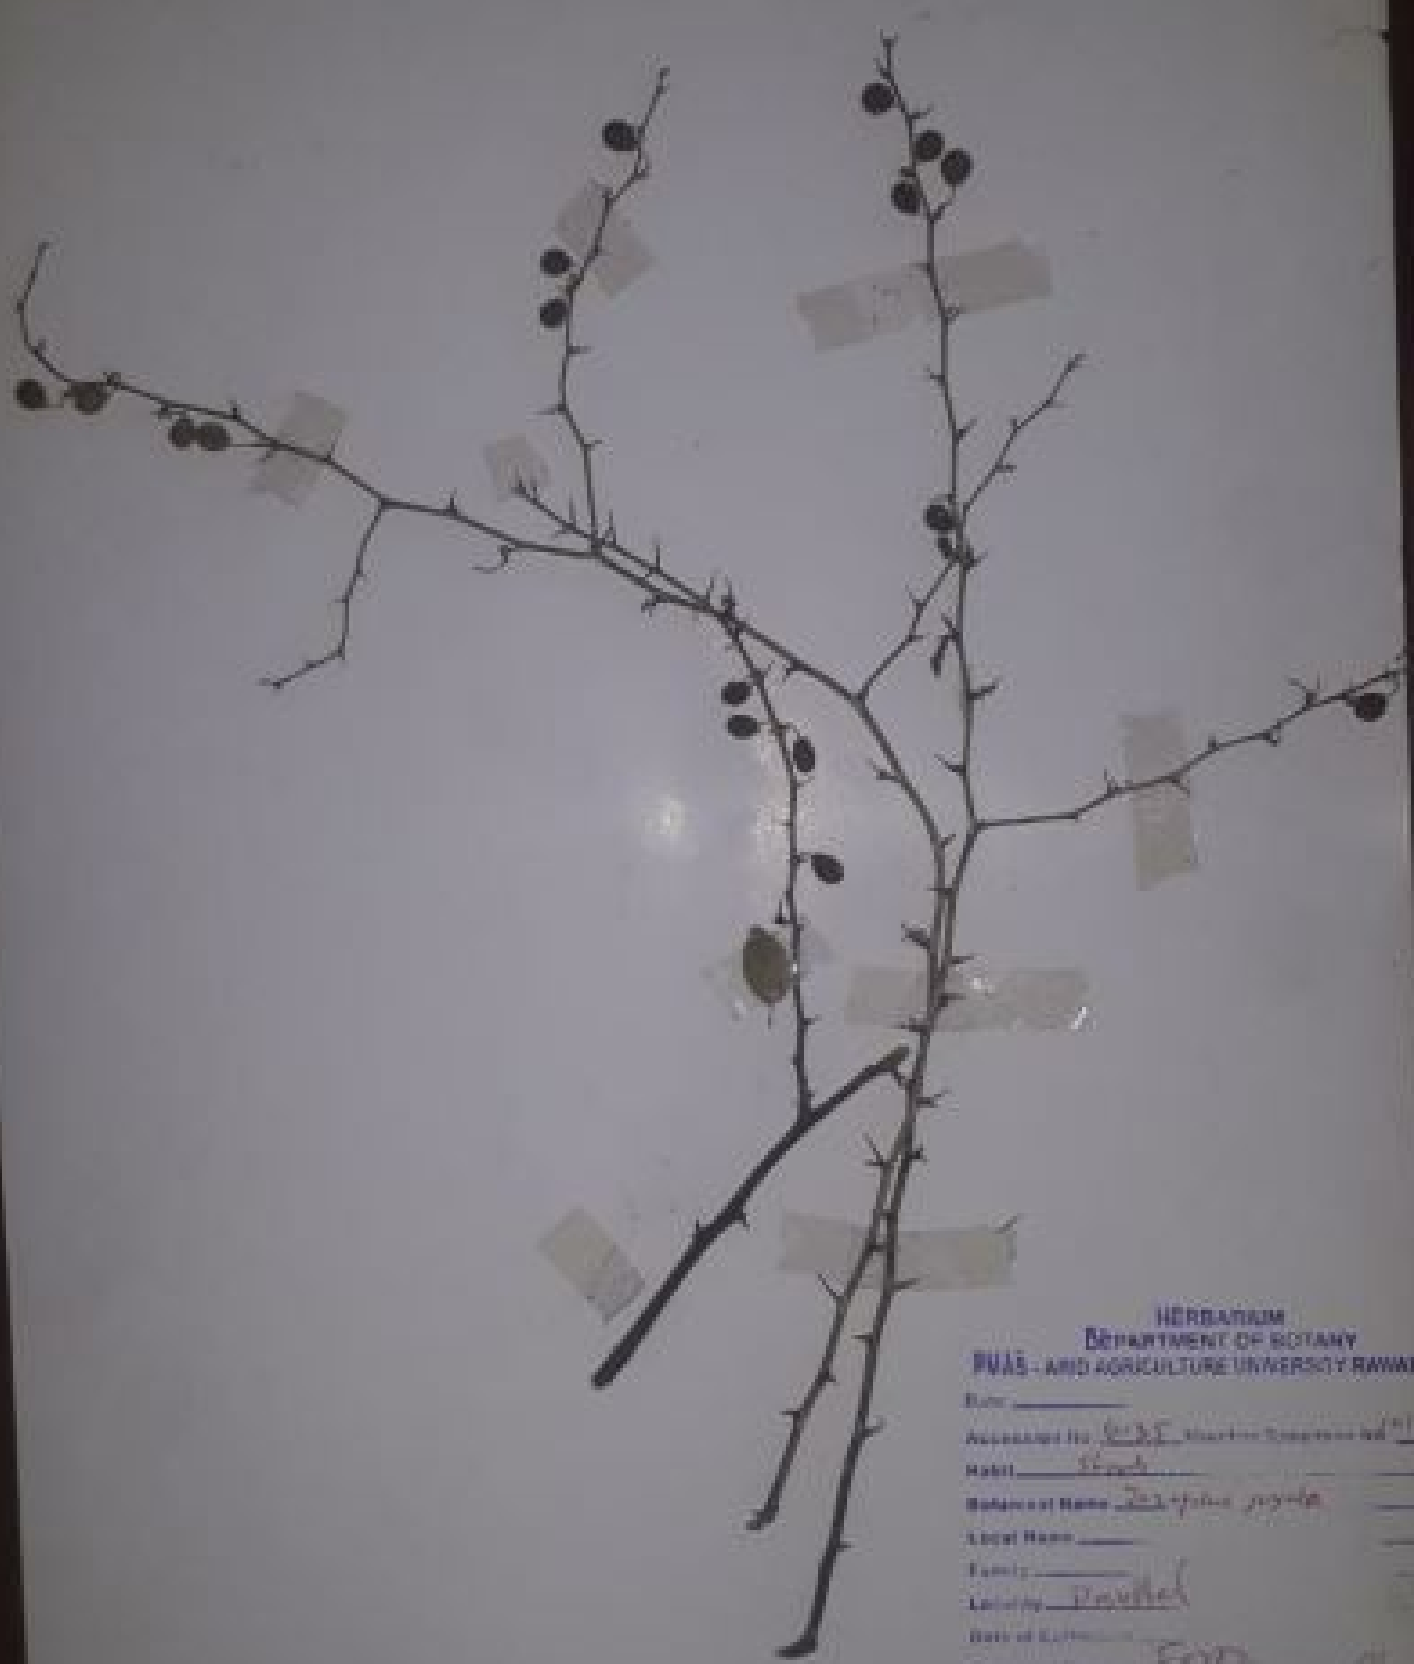

HERBARIUM  
DEPARTMENT OF BOTANY  
PMA5 - AND AGRICULTURE UNIVERSITY RAWALPINDI

Date: \_\_\_\_\_  
Accession No. 9135 Herbarium Department  
Habit: Shrub  
Botanical Name: Zizyphus jujuba  
Local Name: \_\_\_\_\_  
Family: \_\_\_\_\_  
Locality: Rawal  
Date of Collection: \_\_\_\_\_  
Collector: Faris  
Manager: Dr. Akmal
